# Supplementary material for: Late-stage functionalization of the 4-amino-2-pyridone chemotype using electrochemical and MCR approaches
Source: Royal Society of Chemistry journal article supplement (doi:10.1039/d4cc02473g), 2024-01-01
Supplement: d4cc02473g1.pdf [file d4cc02473g1.pdf]

# Supporting information

## Late-Stage Functionalization of the 4-amino-2-Pyridone Chemotype Using Electrochemical and MCR approaches

Lisa Giannessi,<sup>a</sup> Matteo Longo,<sup>a</sup> Chiara Massera<sup>b</sup> and Marco Radi<sup>a,\*</sup>

<sup>a</sup>Dipartimento di Scienze degli Alimenti e del Farmaco (DipALIFAR), Università degli Studi di Parma, Viale delle Scienze, 27/A, 43124 Parma, Italy

<sup>b</sup>Dipartimento di Scienze Chimiche, della Vita e della Sostenibilità Ambientale, Università degli Studi di Parma, Viale delle Scienze 17/A, Parma, 43124, Italy

### Table of contents

|                                                            |     |
|------------------------------------------------------------|-----|
| 1. General considerations.....                             | S2  |
| 2. Electrochemistry experiments .....                      | S3  |
| 3. Proposed reaction mechanisms.....                       | S5  |
| 4. Tables for the optimization of reaction conditions..... | S8  |
| 5. General procedures .....                                | S10 |
| 6. Characterization of the compounds .....                 | S12 |
| 7. NMR Spectra.....                                        | S20 |
| 8. X-ray diffraction analysis.....                         | S35 |

# 1. General considerations

All solvents and commercially available reagents were purchased from Fisher Scientifics and Fluorochem and used without further purification unless otherwise stated. Solvents used for work-up and purification procedures were of technical grade. TLC was carried out using Sigma-Aldrich TLC plates (silica gel on Al foils, SUPELCO Analytical, Merck 60 F254 silica plates). Visualization was accomplished by irradiation with a UV lamp and/or staining with either  $\text{KMnO}_4$  or ninhydrin. Column chromatography was performed over Silica gel 60 Å (40-63 $\mu$  mesh). Residual solvent was removed using a static oil pump (< 10 mbar).

All reactions were carried out under aerobic conditions unless otherwise stated. Electrolyses were performed using an IKA Electrasyn 2.0, using carbon graphite working electrode and graphite counter electrode, and using a variable stirring rate between 400- 1500 rpm. Microwave assisted reaction were performed using a CEM Discover Synthesis Unit (CEM Corp., Matthews, NC). The machine consists of a continuous focused microwave power delivery system with an operator-selectable power output from 0 to 300 W. The temperature inside the reaction vessel was monitored using a calibrated infrared temperature control mounted under the reaction vessel. All experiments were performed using a stirring option whereby the reaction mixtures were stirred by means of a rotating magnetic plate located below the floor of the microwave cavity and a Teflon-coated magnetic stir bar in the vessel.

NMR spectra were obtained using a Bruker AV-400 MHz NMR and Jeol 600 MHz ECZ600R NMR spectrometers and are reported in parts per million (ppm) relative to TMS. All heteronuclear NMR spectra were  $^1\text{H}$ -decoupled and recorded at room temperature unless otherwise stated. Data for  $^1\text{H}$  NMR spectra are reported as follows: chemical shift ( $\delta$ , ppm), integration, multiplicity (s, singlet; d, doublet; t, triplet; m, multiplet; br, broad), and coupling constant (Hz). Data for  $^{13}\text{C}$  NMR are reported in terms of chemical shift ( $\delta$ , ppm). Data for  $^{19}\text{F}$  NMR spectra are reported as follows: chemical shift ( $\delta$ , ppm), integration, and multiplicity (s, singlet).

Elemental analyses were performed by using a FlashSmart CHNS analyzer (Thermo Fisher) with gas-chromatographic separation. All final compounds were >95% pure as determined by elemental analysis (within 0.4% of the theoretical values). Low resolution mass spectrometry measurements were performed on an Agilent 6100 Series InfinityLab LC/MSD iQ, Single Quadrupole analyzer and are reported in the form of (m/z). Melting points were taken using a Gallenkamp melting point apparatus and were uncorrected.

## 2. Electrochemistry experiments

**GENERAL POLISHING PROCEDURE:** Graphite and platinum electrodes were washed after each experiment by sonication in acetone (5 minutes x2) and methanol (5 minutes).

When the platinum electrode surface resulted passivated, the surface layer was removed by alumina scrub, then washed with water, methanol and acetone.

Ag wire electrode was washed using water and acetone.

### CYCLIC VOLTAMMETRY EXPERIMENTS:

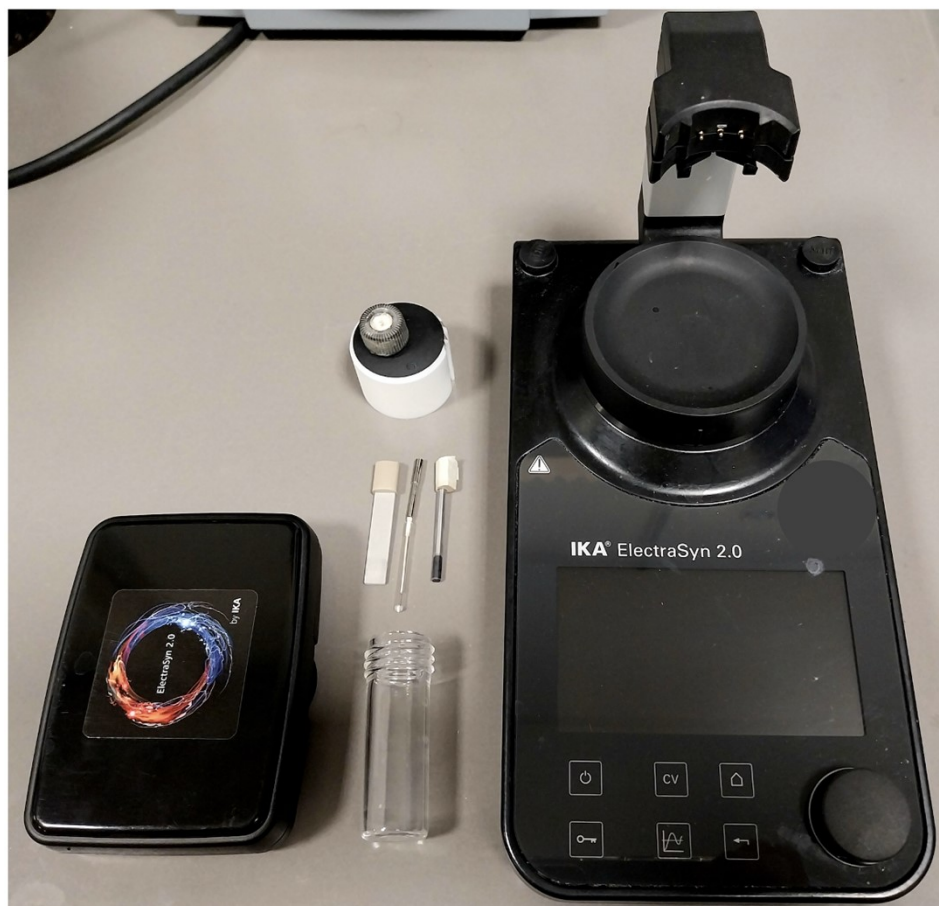

**Figure S1.** Electrasyn 2.0 and cyclic voltammetry set of electrodes used for collecting the voltammograms.

1. All CV Experiments were performed with Electrasyn 2.0.
2. Data were elaborated with Excel.
3. Experimental conditions: Methanol as solvent (4.0 mL); TBAClO<sub>4</sub> as supporting electrolyte (100 mM), cyclic voltammetry kit as electrodes: 1) Working electrode: 3 mm diameter glassy carbon disc electrode, 2) Counter electrode: platinum plate electrode, 3) Reference electrode: Ag wire (Ag/AgCl); TBAClO<sub>4</sub> 0.1 M as supporting electrolyte. Experimental parameters: Segments: 3. Initial voltage: 0.0 V. Upper voltage: 2.0 V. Lower voltage: -1.0 V. Final voltage: 0.0 V. Sweep: 100mV/s.

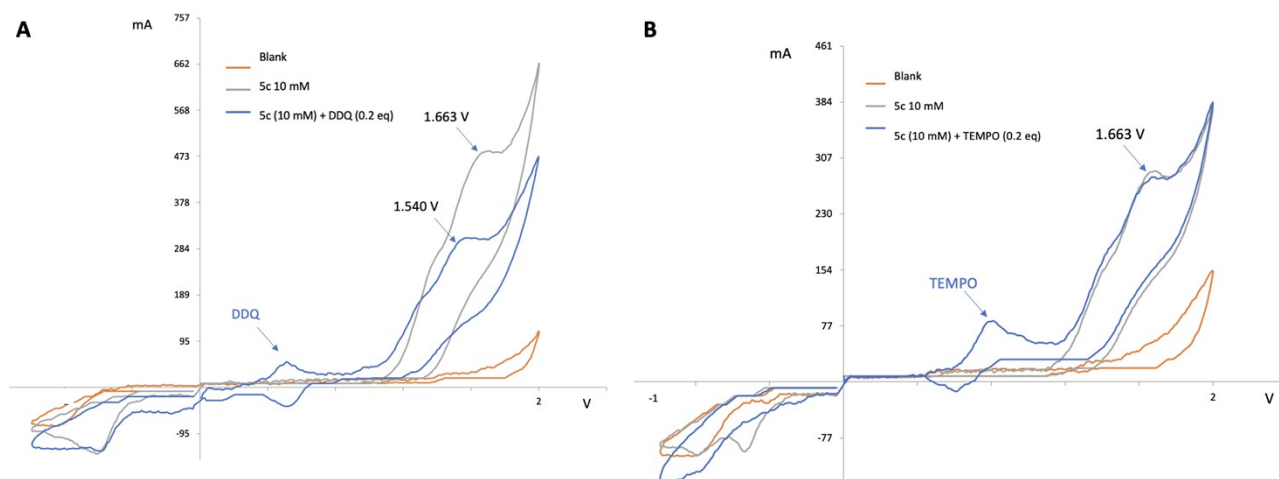

**Figure S2.** Voltammograms of **5c** in combination with different electrocatalyst (DDQ an TEMPO, 0.2 eq). Graphs: A) In orange: blank (only TBAClO<sub>4</sub> 100 mM); In grey: TBAClO<sub>4</sub> 100 mM, **5c** 10 mM; In blue: TBAClO<sub>4</sub> 100 mM, **5c** 10 mM and DDQ 2 mM. B) In orange: blank (only TBAClO<sub>4</sub> 100 mM); In grey: TBAClO<sub>4</sub> 100 mM, **5c** 10 mM; In blue: TBAClO<sub>4</sub> 100 mM, **5c** 10 mM and TEMPO 2 mM.

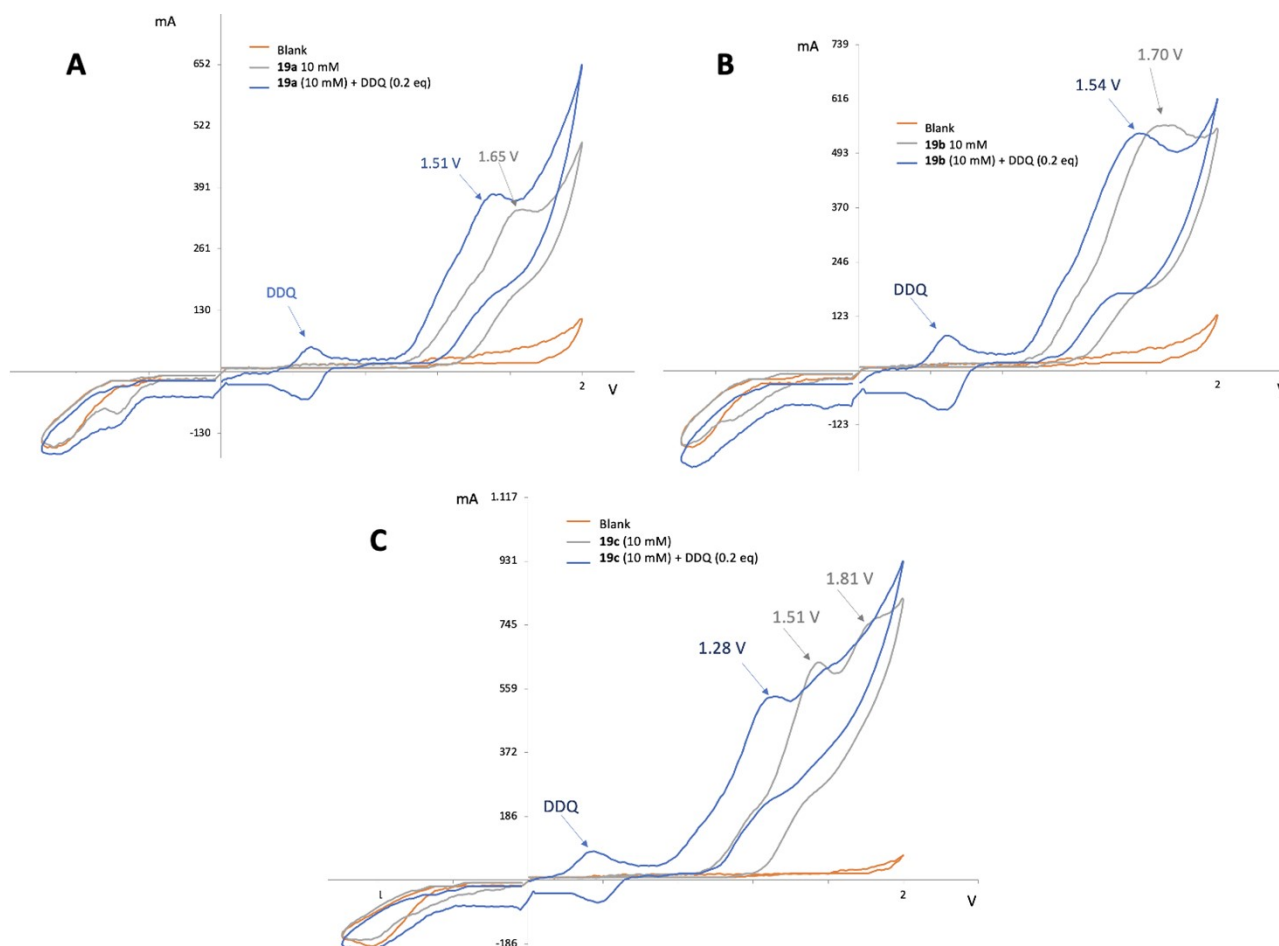

**Figure S3.** Voltammograms of **19a-c** in the reaction conditions. Graphs: A) In orange: blank (only TBAClO<sub>4</sub> 100 mM); In grey: TBAClO<sub>4</sub> 100 mM, **19a** 10 mM; In blue: TBAClO<sub>4</sub> 100 mM, **19a** 10 mM and DDQ 2 mM. B) In orange: blank (only TBAClO<sub>4</sub> 100 mM); In grey: TBAClO<sub>4</sub> 100 mM, **19b** 10 mM; In blue: TBAClO<sub>4</sub> 100 mM, **19b** 10 mM and DDQ 2 mM. C) In orange: blank (only TBAClO<sub>4</sub> 100 mM); In grey: TBAClO<sub>4</sub> 100 mM, **19c** 10 mM; In blue: TBAClO<sub>4</sub> 100 mM, **19c** 10 mM and DDQ 2 mM.

### 3. Proposed reaction mechanisms

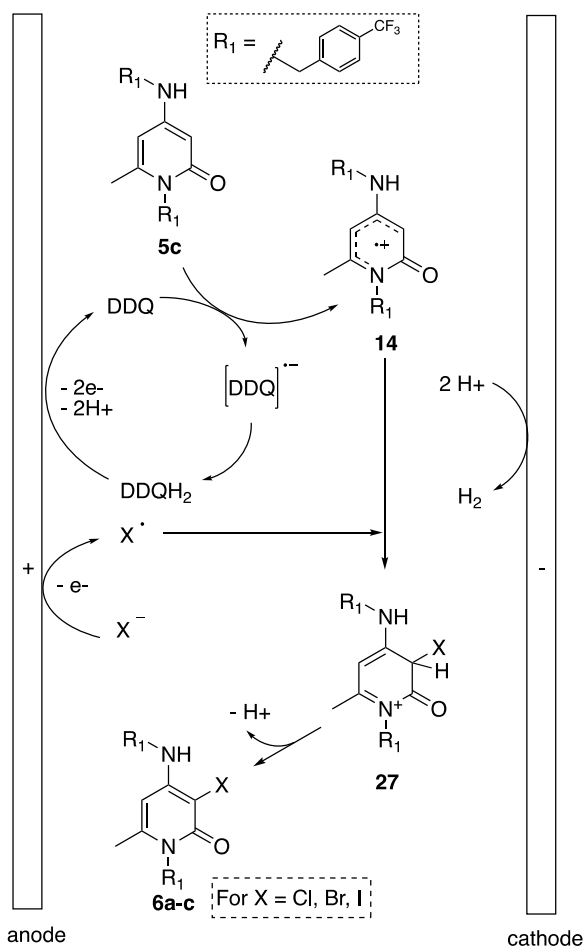

**Scheme S1.** Synthesis of compounds of type **6**.

After the DDQ mediated anodic oxidation of **5c** to radical cation **14**, this intermediate reacts with the radical  $X^\cdot$ , anodically generated starting from the corresponding supporting electrolyte, giving rise to the tetrameric intermediate of type **27** which, by losing a proton, yields the desired product of type **6**.

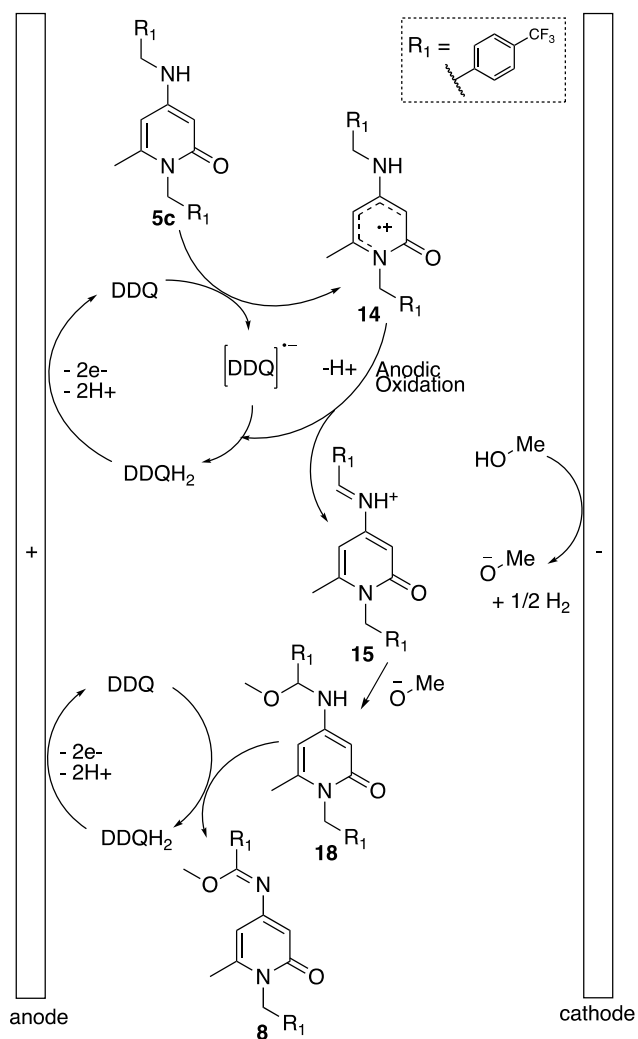

**Scheme S2.** Synthesis of compound **8**.

After the DDQ mediated anodic oxidation of **5c** to radical cation **14**, this intermediate is further oxidized to iminium cation **15**, which then reacts with methoxide (cathodically generated *in situ* from the solvent, MeOH). The resulting amine **18** is further oxidized (DDQ catalyzed reaction), giving rise to the corresponding enamine **8**.

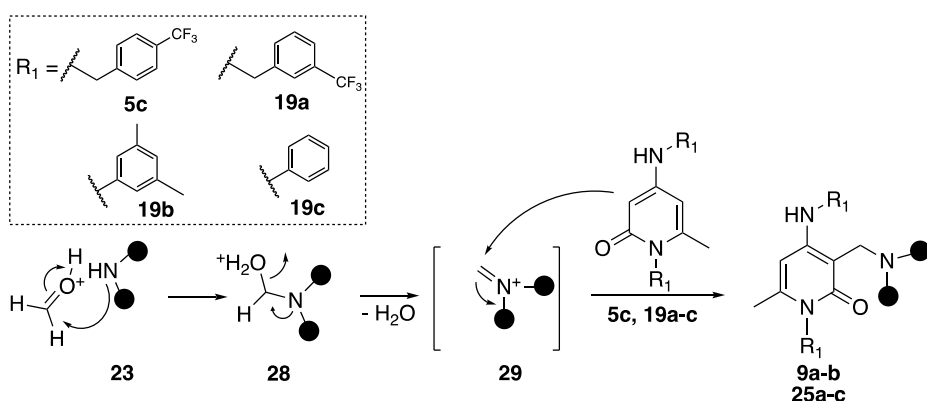

**Scheme S3.** MCR using secondary amine as nucleophiles: Mannich reaction.

The iminium cation **28**, formed through condensation reaction between amine **23** and formaldehyde, reacts with the 4-amino-2-pyridone **5c** or **19a-c**, giving rise to the corresponding product **9a-b** or **25a-c**.

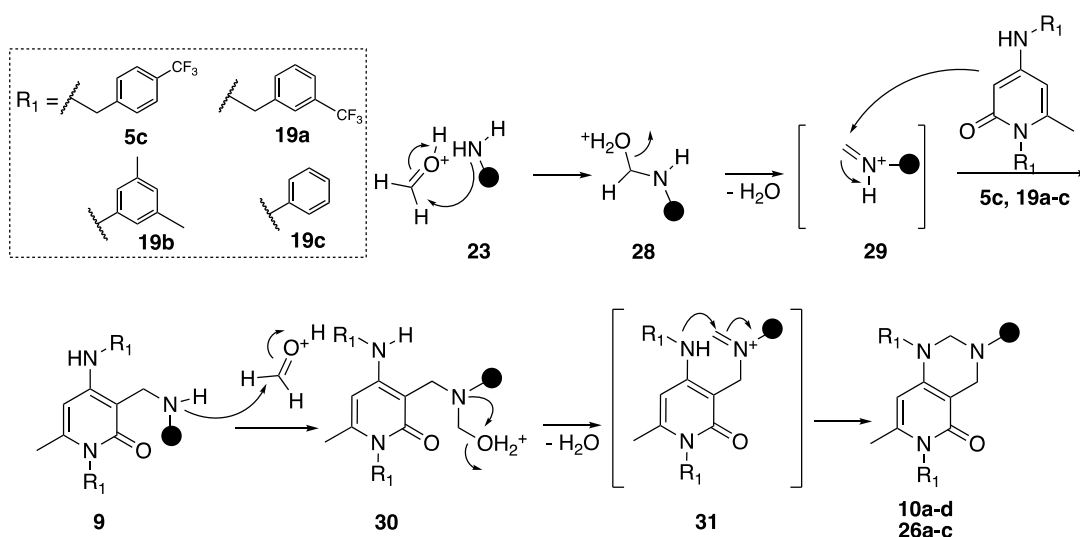

**Scheme S4.** MCR using primary amine as nucleophiles.

The iminium cation **28**, formed through condensation reaction between amine **23** and formaldehyde, reacts with the 4-amino-2-pyridone **5c** or **19a-c**, giving rise to the corresponding intermediate of type **9**. The highly reactive intermediate is not isolable, and reacts with another equivalent of formaldehyde, affording the iminium cation **31**, which then gives rise to the corresponding products **10a-d** or **26a-c** through intramolecular cyclization due to the nucleophilic attack of the N4.

## 4. Tables for the optimization of reaction conditions

**Table S1.** Optimization conditions for the synthesis of compound **8**.<sup>a</sup>

| Entry           | Supporting electrolyte                    | TFA (cat.) | Yield (%) <sup>b</sup> | I (mA)     | Total charge (F/mol) |
|-----------------|-------------------------------------------|------------|------------------------|------------|----------------------|
| 1               | NaCN                                      | no         | 0                      | 10         | 2                    |
| <b>2</b>        | <b>NaCN</b>                               | <b>no</b>  | <b>20</b>              | <b>1.5</b> | <b>8</b>             |
| 3               | <i>n</i> Bu <sub>4</sub> ClO <sub>4</sub> | yes        | 0                      | 1.5        | 2                    |
| 4               | <i>n</i> Bu <sub>4</sub> ClO <sub>4</sub> | no         | 0                      | 1.5        | 2                    |
| 5               | <i>n</i> Bu <sub>4</sub> F                | yes        | 0                      | 1.5        | 2                    |
| 6               | <i>n</i> Bu <sub>4</sub> F                | yes        | 0                      | 1.5        | 2                    |
| 7               | NaClO <sub>4</sub>                        | yes        | 0                      | 1.5        | 2                    |
| 8               | NaClO <sub>4</sub>                        | no         | 0                      | 1.5        | 2                    |
| 9               | MeONa                                     | yes        | 0                      | 1.5        | 2                    |
| 10              | MeONa                                     | no         | 0                      | 1.5        | 2                    |
| 11              | KBr                                       | yes        | 0                      | 1.5        | 2                    |
| 12              | Et <sub>4</sub> NTs                       | yes        | 0                      | 1.5        | 2                    |
| 13              | <i>n</i> Bu <sub>4</sub> PF <sub>6</sub>  | yes        | 0                      | 1.5        | 2                    |
| 14              | <i>n</i> Bu <sub>4</sub> PF <sub>6</sub>  | no         | 0                      | 1.5        | 2                    |
| 15 <sup>c</sup> | /                                         | yes        | 0                      | 1.5        | Not started          |

<sup>a</sup>Reaction Conditions: graphite anode (8 x 52.5 x 2 mm), graphite electrode (8 x 52.5 x 2 mm), **5c** (0.1 mmol), DDQ (0.02 mmol), electrolyte (0.2 mmol), methanol (4 mL), electrolysis at a constant current for 2-8 F/mol in an undivided cell at room temperature.

<sup>b</sup>Isolated yields.

<sup>c</sup>Resistance too high.

**Table S2.** Optimization conditions for the synthesis of **9a**.

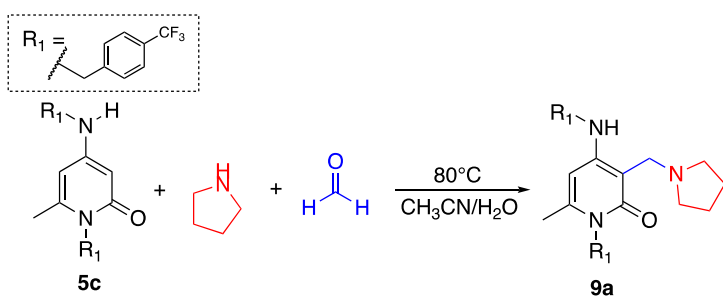

| Entry | heating                | time       | yield (%) |
|-------|------------------------|------------|-----------|
| 1     | conventional           | overnight  | 70        |
| 2     | Microwave, sealed tube | 40 minutes | 73        |
| 3     | Microwave, open vessel | 40 minutes | 72        |



**Table S3.** Optimization conditions for the synthesis of **10a**.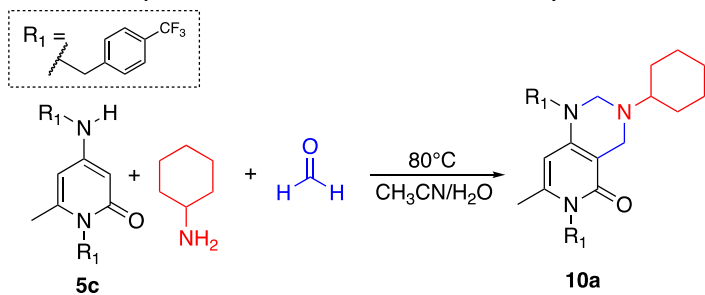

| Entry | heating                | time       | yield (%) |
|-------|------------------------|------------|-----------|
| 1     | conventional           | overnight  | 47        |
| 2     | microwave, sealed tube | 40 minutes | 43        |
| 3     | microwave, open vessel | overnight  | 63        |

**Table S4.** Optimization conditions for the synthesis of **10b**.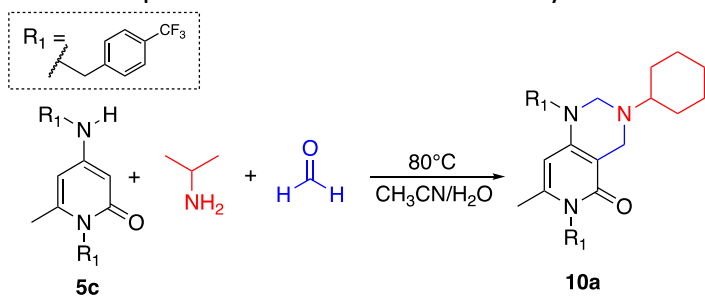

| Entry | heating                | time       | yield (%) |
|-------|------------------------|------------|-----------|
| 1     | conventional           | overnight  | 40        |
| 2     | microwave, sealed tube | 40 minutes | 40        |
| 3     | microwave, open vessel | overnight  | 40        |

## 5. General procedures

### GENERAL PROCEDURE 1 (GP1)

In a 10 mL microwave tube, equipped with magnetic stir bar and septum, a mixture 4-hydroxy-6-methyl-2-pyrone (100 mg, 1 equivalent, 0.79 mmol) and the proper amine (2 equivalents) was heated at 100°C for 6 minutes in the microwave apparatus (maximum power input: 300 W; maximum pressure: 250 psi; power max: OFF; stirring: ON). After cooling to room temperature, the solid was solubilized in AcOEt, washed with distilled H<sub>2</sub>O, and the organic phase extracted 3 times, then the collected organic layers were washed with BRINE, and finally dried over Na<sub>2</sub>SO<sub>4</sub>. Once removed the solvent under reduced pressure, the resulting crude was purified by flash chromatography, affording the desired product.

### GENERAL PROCEDURE 2 (GP2)

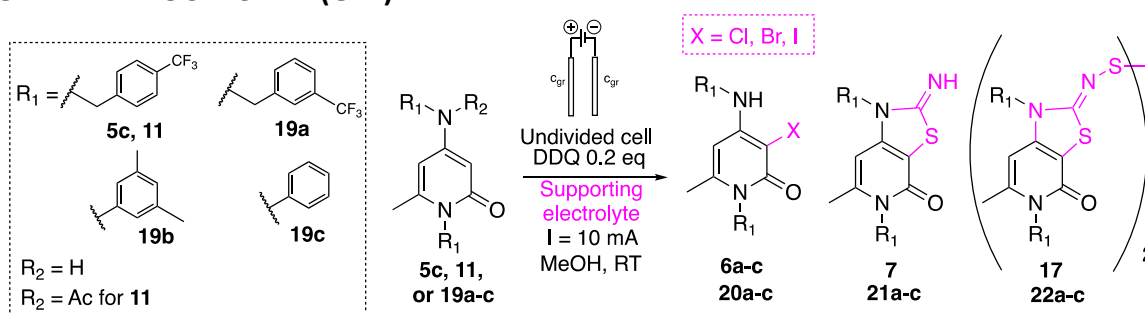

A 10 mL IKA Electrasyn electrochemical vial was charged with compound **5c**, **11** or **19a-c** (0.10 mmol, 1 eq), DDQ (4.54 mg, 0.02 mmol, 0.2 eq), the appropriate supporting electrolyte (0.2 mmol, 2 eq), TFA (depending on the case, catalytic amount, 1 drop), and MeOH (4 mL). The resulting mixture was then electrolysed at a constant current of 10 mA until complete conversion of the starting material, as monitored by TLC analysis (2-4 F/mol). Upon completion, the crude reaction mixture was poured into water and extracted with ethyl acetate. The combined organic extracts were washed with BRINE, dried over Na<sub>2</sub>SO<sub>4</sub>, filtered, and the solvent was removed under vacuum. The desired product was then obtained pure after flash chromatography purification.

### GENERAL PROCEDURE 3 (GP3)

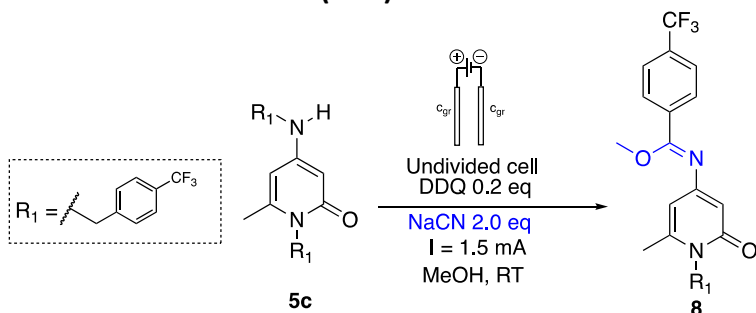

A 10 mL IKA Electrasyn electrochemical vial was charged with compound **5c** (0.10 mmol, 1 eq), DDQ (5.45 mg, 0.02 mmol, 0.2 eq), NaCN (9.8 mg, 0.20 mmol, 2 eq), and MeOH (4.0 mL). The resulting mixture was then electrolysed at a constant current of 1.5 mA until complete conversion of the starting material, as monitored by TLC analysis (8 F/mol). Upon completion, the crude reaction mixture was purified by flash chromatography (DCM/MeOH 98:2), affording the desired product (20%).

#### GENERAL PROCEDURE 4 (GP4)

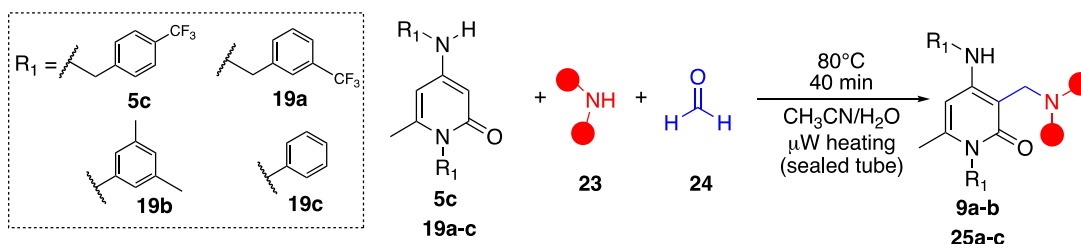

A microwave tube was charged with compound **5c** or **19a-c** (0.1 mmol, 1 eq), the appropriate amine **23** (0.2 mmol, 2 eq), formaldehyde (0.15 mmol, 1.5 eq) acetic acid (20 mol%), and acetonitrile/distilled water (1:1, 2 mL). The resulting mixture was heated at 80°C in the microwave apparatus in sealed tube (maximum power input: 300 W; maximum pressure: 250 psi; power max: OFF; stirring: ON) for 40 minutes, verifying the complete conversion of the starting material by TLC monitoring. Then saturated aqueous  $\text{NaHCO}_3$  was added, and the aqueous phase was extracted three times with dichloromethane, the combined organic layers dried over  $\text{Na}_2\text{SO}_4$ , and the solvent evaporated under reduced pressure. The obtained crude of the reaction was purified by flash chromatography, affording the desired product as yellowish solid.

#### GENERAL PROCEDURE 5 (GP5)

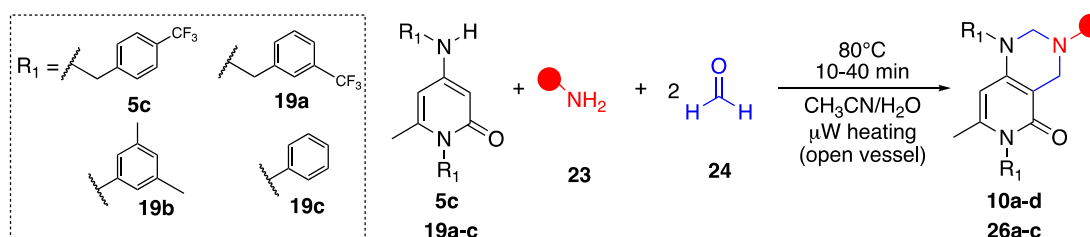

A 10 mL round-bottomed flask was charged with compound **5c** or **19a-b** (0.1 mmol, 1 eq), the appropriate amine **23** (0.2 mmol, 2 eq), formaldehyde (0.4 mmol, 4 eq), acetic acid (20 mol%), and acetonitrile/distilled water (1:1, 2 mL). The resulting mixture was heated at 80°C in the microwave apparatus (maximum power input: 300 W; maximum pressure: 250 psi; power max: OFF; stirring: ON) for 10-40 minutes, verifying the complete conversion of the starting material by TLC monitoring. Then saturated aqueous  $\text{NaHCO}_3$  was added, and the aqueous phase was extracted three times with dichloromethane, the combined organic layers dried over  $\text{Na}_2\text{SO}_4$ , and the solvent evaporated under reduced pressure. The obtained crude of the reaction was purified by flash chromatography, affording the desired product as white solid.

## 6. Characterization of the compounds

### 4-Amino-2-pyridones starting materials:

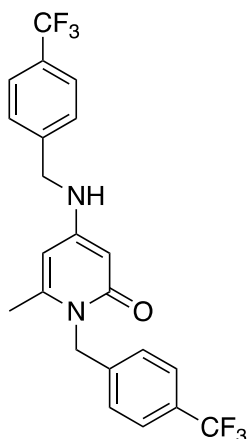

### Compound 5c

#### 6-methyl-1-(4-(trifluoromethyl)benzyl)-4-((4-(trifluoromethyl)benzyl)amino)pyridin-2(1H)-one

According to GP1, using 4-(trifluoromethyl)benzylamine as proper amine (2 equivalents, 1.58 mmol, 138  $\mu$ L) the desired product was obtained after flash chromatography purification ( $\text{CHCl}_3/\text{MeOH}$  99/1-98/2), in 55% yield (180.40 mg). White solid, m.p. 171-173  $^{\circ}\text{C}$ .  $^1\text{H}$  NMR (400 MHz,  $\text{CDCl}_3$ )  $\delta$  7.505 (2H, d,  $J = 7.83$  Hz), 7.46 (2H, d,  $J = 7.83$  Hz), 7.33 (2H, d,  $J = 7.83$  Hz), 7.16 (2H, d,  $J = 7.83$  Hz), 5.53 (1H, d,  $J = 1.89$  Hz), 5.46 (1H, d,  $J = 1.89$  Hz), 5.18 (2H, bs), 4.79 (1H, bs), 4.26 (2H, d,  $J = 4.60$  Hz), 2.04 (3H, s).  $^{13}\text{C}$  NMR (100.6 MHz,  $\text{CDCl}_3$ )  $\delta$  163.5, 153.9, 144.5, 140.7, 140.5, 128.8 (q,  $J_{\text{C-F}} = 32.51$  Hz), 128.5 (q,  $J_{\text{C-F}} = 32.51$  Hz), 126.4, 125.6, 124.7, 124.7, 123.0 (2C, q,  $J_{\text{C-F}} = 271.69$  Hz), 99.0, 89.9, 45.3, 44.9, 19.4.  $^{19}\text{F}$  NMR (564 MHz,  $\text{CDCl}_3$ )  $\delta$  - 62.43 (3F, s), - 62.45 (3F, s). MS (ESI)  $m/z$  441.2  $[\text{M}+\text{H}]^+$ ; 463.3  $[\text{M}+\text{Na}]^+$ .

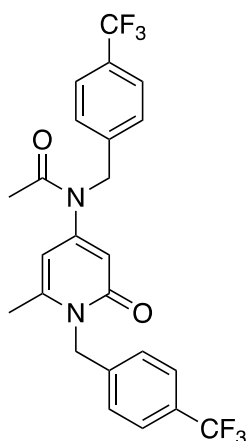

### Compound 11

#### N-(6-methyl-2-oxo-1-(4-(trifluoromethyl)benzyl)-1,2-dihydropyridin-4-yl)-N-(4-(trifluoromethyl)benzyl)acetamide

In a 10 mL microwave tube, equipped with magnetic stir bar and septum, a mixture of compound **5c** (0.10 mmol, 44.04 mg), acetyl chloride (2.5 eq, 0.25 mmol, 17.77  $\mu$ L), and pyridine (2.5 eq, 0.25 mmol, 20.14  $\mu$ L) in anhydrous DCM (1.5 mL) was heated at 45  $^{\circ}\text{C}$  for 30 min in the microwave apparatus (maximum power input: 300 W; maximum pressure: 250 psi; power max: OFF; stirring: ON). After cooling to room temperature, the solution was diluted with Ethyl Acetate and washed with  $\text{NaHCO}_3$  sat. sol. The aqueous phase was then extracted with Ethyl Acetate (3 times), and the

collected organic layers washed with BRINE, dried over  $\text{Na}_2\text{SO}_4$ , filtered, and the solvent removed under reduced pressure. The crude of the reaction was then purified by flash chromatography (DCM/MeOH 98/2), affording in 51% yield (46.00 mg) the desired product as yellowish solids. m.p. 82-84 °C.  $^1\text{H}$  NMR (400 MHz,  $\text{CDCl}_3$ )  $\delta$  7.52-7.49 (m, 4H), 7.28 (2H, d,  $J = 8.37$  Hz), 7.17 (2H, d,  $J = 8.37$  Hz), 6.19 (1H, d,  $J = 2.30$  Hz), 5.84 (1H, s), 5.26 (2H, s), 4.85 (2H, s), 2.18 (3H, s), 2.09 (3H, s).  $^{13}\text{C}$  NMR (100.6 MHz,  $\text{CDCl}_3$ )  $\delta$  168.6, 162.7, 151.7, 146.5, 139.6, 138.7, 128.9 (q,  $J_{\text{C-F}} = 32.83$  Hz), 128.8 (q,  $J_{\text{C-F}} = 32.51$  Hz), 126.9, 125.7, 124.8, 124.8, 124.6, 124.5, 122.9 (q,  $J_{\text{C-F}} = 272.08$  Hz), 121.8 (q,  $J_{\text{C-F}} = 272.08$  Hz), 113.1, 105.4, 50.3, 45.8, 21.7, 19.7.  $^{19}\text{F}$  NMR (564 MHz,  $\text{CDCl}_3$ )  $\delta$  -62.47 (3F, s), -62.57 (3F, s). MS (ESI)  $m/z$  483.1  $[\text{M}+\text{H}]^+$ .

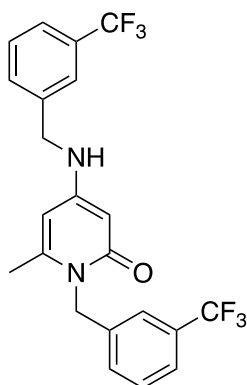

#### Compound 19a

##### 6-methyl-1-(3-(trifluoromethyl)benzyl)-4-((3-(trifluoromethyl)benzyl)amino)pyridin-2(1H)-one

According to GP1, using 3-(trifluoromethyl)benzylamine as proper amine (2 equivalents, 1.58 mmol, 138  $\mu\text{L}$ ) the desired product was obtained after flash chromatography purification ( $\text{CHCl}_3/\text{MeOH}$  99/1-98/2), in 55% yield (180.40 mg). White solid, m.p. 190-194 °C.  $^1\text{H}$  NMR (400 MHz,  $\text{CDCl}_3$ )  $\delta$  7.44-7.28 (6H, m), 7.20 (1H, d,  $J = 7.50$  Hz), 5.52 (1H, d,  $J = 1.87$  Hz), 5.37 (1H, d,  $J = 2.41$  Hz), 5.22 (1H, t,  $J = 5.35$  Hz), 5.14 (2H, bs), 4.20 (2H, d,  $J = 5.62$  Hz), 2.00 (3H, s).  $^{13}\text{C}$  NMR (100.6 MHz,  $\text{CDCl}_3$ )  $\delta$  164.7, 155.0, 145.3, 138.9, 138.6, 131.1 (q,  $J_{\text{C-F}} = 32.21$  Hz), 131.0 (q,  $J_{\text{C-F}} = 33.28$  Hz), 130.6, 129.6, 129.3, 129.2, 124.4, 124.3, 124.0 (2C), 124.0 (q,  $J_{\text{C-F}} = 272.26$  Hz), 124.0 (q,  $J_{\text{C-F}} = 272.97$  Hz), 123.9, 123.8, 123.0, (2C), 100.1, 90.7, 46.3, 45.8, 20.4.  $^{19}\text{F}$  NMR (564 MHz,  $\text{CDCl}_3$ )  $\delta$  -62.49 (6F, bs). MS (ESI)  $m/z$  441.2  $[\text{M}+\text{H}]^+$ .

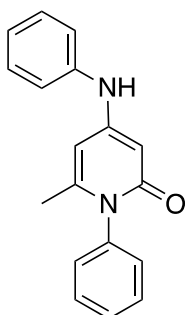

#### Compound 19b

##### 6-methyl-1-phenyl-4-(phenylamino)pyridin-2(1H)-one

According to GP1, using aniline as proper amine (2 equivalents, 1.58 mmol, 156  $\mu\text{L}$ ) the desired product was obtained after flash chromatography purification (hexane/ethyl acetate 6/4), in 50% yield (109.2 mg). White solid, m.p. 190-195 °C.  $^1\text{H}$  NMR (400 MHz,  $\text{CDCl}_3$ )  $\delta$  7.39-7.35 (2H, m), 7.32-7.20 (1H, m), 7.25-7.21 (2H, m), 7.11-7.06 (4H, m), 7.03-7.00 (1H, t,  $J = 7.43$  Hz), 6.55 (1H, s), 5.92 (1H, d,  $J = 2.48$  Hz), 5.75 (1H, d,  $J = 1.73$  Hz), 1.77 (3H, s).  $^{13}\text{C}$  NMR (100.6 MHz,  $\text{CDCl}_3$ )  $\delta$  165.1, 130.1, 145.9, 139.3, 138.9, 129.5, 129.3, 128.5, 124.2, 122.6, 99.7, 93.6, 21.6. MS (ESI)  $m/z$  277.1  $[\text{M}+\text{H}]^+$ .

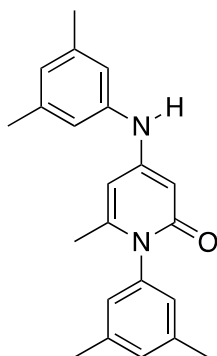

### Compound 19c

#### 1-(3,5-dimethylphenyl)-4-((3,5-dimethylphenyl)amino)-6-methylpyridin-2(1H)-one

According to GP1, using 3,5-dimethylaniline as proper amine (2 equivalents, 1.58 mmol, 197.2  $\mu$ L) the desired product was obtained after flash chromatography purification (Dichloromethane/Methanol 98/2), in 40% yield (105.0 mg). White solid, m.p. 210-215  $^{\circ}$ C.  $^1$ H NMR (400 MHz,  $\text{CDCl}_3$ )  $\delta$  7.01 (1H, s), 6.80 (2H, s), 6.78 (2H, s), 6.74 (1H, s), 6.59 (1H, s), 6.02 (1H, d,  $J$  = 2.34 Hz), 5.74 (1H, d,  $J$  = 1.69 Hz), 2.32 (6H, s), 2.29 (6H, s), 1.87 (3H, s).  $^{13}$ C NMR (100.6 MHz,  $\text{CDCl}_3$ )  $\delta$  165.3, 153.0, 145.7, 139.3, 139.2, 138.9, 138.8, 130.1, 126.0, 125.8, 120.1, 99.8, 93.5, 21.5, 21.4, 21.2. MS (ESI)  $m/z$  355.2  $[\text{M}+\text{Na}]^+$ .

### e-LSF:

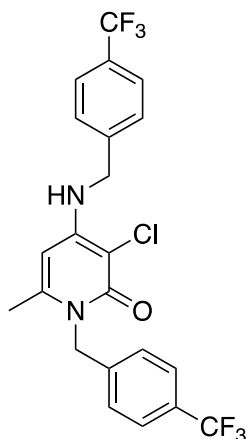

### Compound 6a

#### 3-chloro-6-methyl-1-(4-(trifluoromethyl)benzyl)-4-((4-(trifluoromethyl)benzyl)amino)pyridin-2(1H)-one

According to GP2, with compound **5c** as starting material (44.0 mg), using KCl (14.91 mg) as supporting electrolyte, and in the presence of TFA, after electrolyzing the reaction mixture for 4 F/mol, the title compound (19.00 mg) was isolated by flash chromatography (dichloromethane/methanol 98/2) in 40% yield. White solid. m.p. 72-75  $^{\circ}$ C.  $^1$ H NMR (400 MHz,  $\text{CDCl}_3$ )  $\delta$  7.56 (2H, d,  $J$  = 8.55 Hz), 7.48 (2H, d,  $J$  = 8.55 Hz), 7.35 (2H, d,  $J$  = 7.60 Hz), 7.21 (2H, d,  $J$  = 7.60 Hz), 5.56 (1H, s), 5.33 (1H, t,  $J$  = 5.70 Hz), 5.27 (2H, s), 4.48 (2H, d,  $J$  = 5.70 Hz), 2.10 (3H, s).  $^{13}$ C NMR (100.6 MHz,  $\text{CDCl}_3$ )  $\delta$  158.5, 149.3, 143.6, 140.7, 139.8, 129.1 (q,  $J_{\text{C-F}}$  = 33.88 Hz), 128.8 (q,  $J_{\text{C-F}}$  = 31.88 Hz), 126.0, 125.9, 125.0, 124.9, 124.8, 124.7, 123.0 (2C, q,  $J_{\text{C-F}}$  = 271.78 Hz), 98.7, 94.0, 46.3, 45.3, 19.9.  $^{19}$ F NMR (564 MHz,  $\text{CDCl}_3$ )  $\delta$  -62.46 (3F, s), -62.48 (3F, s). MS (ESI)  $m/z$  475.3, 477.1  $[\text{M}+\text{H}]^+$ .

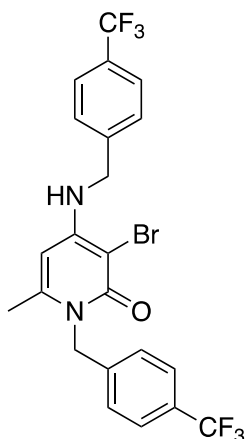

### Compound 6b

#### 3-bromo-6-methyl-1-(4-(trifluoromethyl)benzyl)-4-((4-(trifluoromethyl)benzyl)amino)pyridin-2(1H)-one

According to GP2, with compound **5c** as starting material (44.0 mg), using KBr (23.80 mg) as supporting electrolyte, and in the presence of TFA, after electrolyzing the reaction mixture for 4 F/mol, the title compound (29.60 mg) was isolated by flash chromatography (dichloromethane/methanol 98/2) in 57 % yield. White solid. m.p. 74-76 °C. <sup>1</sup>H NMR (400 MHz, CDCl<sub>3</sub>) δ 7.55 (2H, d, *J* = 8.48 Hz), 7.47 (2H, d, *J* = 8.48 Hz), 7.34 (2H, d, *J* = 7.63 Hz), 7.19 (2H, d, *J* = 8.48 Hz), 5.52 (1H, s), 5.37 (1H, t, *J* = 5.85 Hz), 5.27 (2H, s), 4.47 (2H, d, *J* = 5.85 Hz), 2.08 (3H, s). <sup>13</sup>C NMR (100.6 MHz, CDCl<sub>3</sub>) δ 159.8, 151.8, 145.4, 141.8, 141.0, 130.0 (m), 127.0, 126.9, 126.0, 125.9, 125.7, 125.7, 124.0 (2C, q, *J*<sub>C-F</sub> = 272.1 Hz), 95.2, 91.2, 47.6, 46.5, 20.9. <sup>19</sup>F NMR (564 MHz, CDCl<sub>3</sub>) δ -62.45 (3F, s), -62.48 (3F, s). MS (ESI) *m/z* 519.2, 521.2 [M+H]<sup>+</sup>.

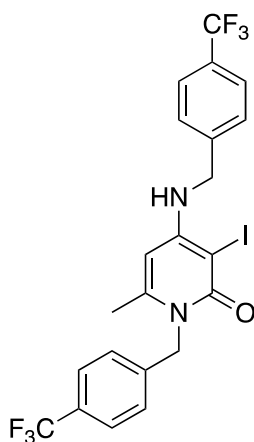

### Compound 6c

#### 3-iodo-6-methyl-1-(4-(trifluoromethyl)benzyl)-4-((4-(trifluoromethyl)benzyl)amino)pyridin-2(1H)-one

According to GP2, with compound **5c** as starting material (44.0 mg), using I<sub>2</sub> (50.76 mg) as supporting electrolyte, after electrolyzing the reaction mixture for 2 F/mol, the title compound (40.80 mg) was isolated by flash chromatography (dichloromethane/methanol 98/2) in 72 % yield. Yellowish solid. m.p. 135-138 °C. <sup>1</sup>H NMR (400 MHz, CDCl<sub>3</sub>) δ 7.56 (2H, d, *J* = 8.18 Hz), 7.47 (2H, d, *J* = 8.18 Hz), 7.34 (2H, d, *J* = 8.18 Hz), 7.19 (2H, d, *J* = 8.18 Hz), 5.33 (1H, t, *J* = 6.00 Hz), 5.29 (2H, s), 4.48 (2H, d, *J* = 6.00 Hz), 2.09 (3H, s). <sup>13</sup>C NMR (100.6 MHz, CDCl<sub>3</sub>) δ 169.7, 163.8, 152.8, 147.6, 140.7, 139.8, 129.9 (2C, q, *J*<sub>C-F</sub> = 33.25 Hz), 128.1, 126.8, 126.0 (2C), 125.7 (2C), 124.0 (2C, q, *J*<sub>C-F</sub> = 272.15 Hz), 114.3, 106.5, 51.5, 46.9, 22.8, 20.8. <sup>19</sup>F NMR (564 MHz, CDCl<sub>3</sub>) δ -62.45 (3F, s), -62.48 (3F, s). MS (ESI) *m/z* 567.2 [M+H]<sup>+</sup>.

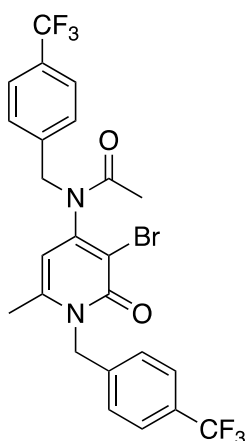

### Compound 13

#### ***N*-(3-bromo-6-methyl-2-oxo-1-(4-(trifluoromethyl)benzyl)-1,2-dihydropyridin-4-yl)-*N*-(4-(trifluoromethyl)benzyl)acetamide**

According to GP2, with compound **11** as starting material (48.2 mg), using KBr (23.80 mg) as supporting electrolyte, and in the presence of TFA, after electrolyzing the reaction mixture for 4 F/mol, the title compound (9.0 mg) was isolated by flash chromatography (dichloromethane 100% – dichloromethane/acetone 95/5) in 16 % yield. White solid. m.p. 73-75 °C. <sup>1</sup>H NMR (400 MHz, CDCl<sub>3</sub>) δ 7.53 (2H, d, *J* = 8.16 Hz), 7.48 (2H, d, *J* = 7.70 Hz), 7.33 (2H, d, *J* = 8.16 Hz), 7.20 (2H, d, *J* = 7.70 Hz), 5.62 (1H, s), 5.32 (2H, d, *J* = 5.22 Hz), 5.26 (1H, d, *J* = 14.70 Hz), 4.35 (1H, d, *J* = 14.70 Hz), 2.14 (3H, s), 1.95 (3H, s). <sup>13</sup>C NMR (100.6 MHz, CDCl<sub>3</sub>) δ 167.7, 159.6, 150.0, 144.9, 139.3, 137.9, 129.1 (2C, q, *J*<sub>C-F</sub> = 32.51 Hz), 128.1, 125.9, 124.9, 124.8, 124.2, 122.8 (q, *J*<sub>C-F</sub> = 273.5 Hz), 122.6 (q, *J*<sub>C-F</sub> = 270.1 Hz), 113.5, 107.0, 49.1, 47.6, 21.0, 19.4. <sup>19</sup>F NMR (564 MHz, CDCl<sub>3</sub>) δ -62.47 (3F, s), -62.63 (3F, s). MS (ESI) *m/z* 561.3, 563.3 [M+H]<sup>+</sup>.

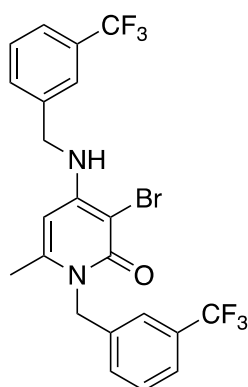

### Compound 20a

#### **3-bromo-6-methyl-1-(3-(trifluoromethyl)benzyl)-4-((3-(trifluoromethyl)benzyl)amino)pyridin-2(1H)-one**

According to GP2, with compound **19a** as starting material (44.0 mg), using KBr (23.80 mg) as supporting electrolyte, and in the presence of TFA, after electrolyzing the reaction mixture for 4 F/mol, the title compound (27.40 mg) was isolated by flash chromatography (dichloromethane/methanol 98/2) in 53 % yield. Yellow solid. m.p. 100-105 °C. <sup>1</sup>H NMR (400 MHz, CDCl<sub>3</sub>) δ 7.49-7.48 (2H, m), 7.43-7.41 (3H, m), 7.35-7.31 (2H, m), 7.27-7.25 (1H, m), 5.56 (1H, s), 5.35 (1H, t, *J* = 6.00 Hz), 5.27 (2H, s), 4.46 (2H, d, *J* = 6.00 Hz), 2.09 (3H, s). <sup>13</sup>C NMR (100.6 MHz, CDCl<sub>3</sub>) δ 159.8, 151.8, 146.0, 145.3, 138.7, 137.9, 131.4 (q, *J*<sub>C-F</sub> = 31.52 Hz), 131.0 (q, *J*<sub>C-F</sub> = 31.52 Hz), 130.1



(2C), 129.6, 129.4, 124.7 (2C), 124.3 (2C), 124.0 (2C, q,  $J_{C-F} = 273.0$  Hz), 123.7, 123.6, 123.3 (2C), 95.3, 91.2, 47.6, 46.6, 20.9.  $^{19}\text{F}$  NMR (564 MHz,  $\text{CDCl}_3$ )  $\delta$  -62.47 (3F, s), -62.56 (3F, s). MS (ESI)  $m/z$  519.1, 521.1  $[\text{M}+\text{H}]^+$ , 541.1, 543.1  $[\text{M}+\text{Na}]^+$ .

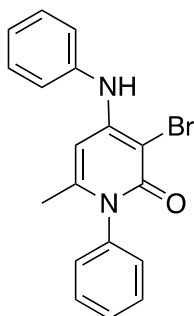

### Compound 20b

#### 3-bromo-6-methyl-1-phenyl-4-(phenylamino)pyridin-2(1H)-one

According to GP2, with compound **19b** as starting material (27.3 mg), using KBr (23.80 mg) as supporting electrolyte, and in the presence of TFA, after electrolyzing the reaction mixture for 4 F/mol, the title compound (17.10 mg) was isolated by flash chromatography (petroleum ether/ethyl acetate 6/4- 5/5) in 48 % yield. Yellow solid. m.p. 186-189 °C.  $^1\text{H}$  NMR (400 MHz,  $\text{CDCl}_3$ )  $\delta$  7.43-7.42 (2H, m), 7.37-7.33 (3H, m), 7.20-7.16 (3H, m), 7.13-7.11 (2H, m), 6.63 (1H, s), 5.91 (1H, s), 1.78 (3H, s).  $^{13}\text{C}$  NMR (100.6 MHz,  $\text{CDCl}_3$ )  $\delta$  160.2, 150.3, 144.9, 138.9, 138.4, 129.6, 129.5, 128.7, 128.3, 125.8, 124.6, 95.8, 92.7, 21.7. MS (ESI)  $m/z$  355.1, 357.1  $[\text{M}+\text{H}]^+$  377.0, 379.0  $[\text{M}+\text{Na}]^+$ .

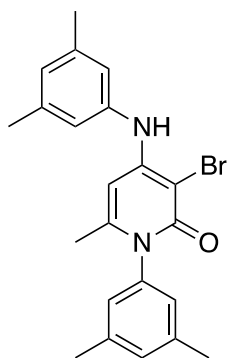

### Compound 20c

#### 3-bromo-1-(3,5-dimethylphenyl)-4-((3,5-dimethylphenyl)amino)-6-methylpyridin-2(1H)-one

According to GP2, with compound **19c** as starting material (33.2 mg), using KBr (23.80 mg) as supporting electrolyte, and in the presence of TFA, after electrolyzing the reaction mixture for 4 F/mol, the title compound (20.2 mg) was isolated by flash chromatography (petroleum ether/ethyl acetate 7/3) in mixture with a second bromination product in 48 % yield (yield of the mixture of product), which cannot be separated.\* Yellow solid. m.p. 115-120 °C.  $^1\text{H}$  NMR (400 MHz,  $\text{CDCl}_3$ )  $\delta$  6.88 (2H, s), 6.77 (1H, s), 6.72 (2H, s), 6.46 ((1H, s), 5.83 (1H, s), 2.36 (6H, s), 2.26 (6H, s), 1.81 (3H, s).  $^{13}\text{C}$  NMR (100.6 MHz,  $\text{CDCl}_3$ )  $\delta$  160.3, 150.0, 145.2, 139.7, 139.4, 138.7, 138.3, 137.0, 125.8, 125.7, 124.2, 122.3, 95.6, 92.9, 24.0, 21.7, 21.3. MS (ESI)  $m/z$  411.1, 413.1  $[\text{M}+\text{H}]^+$ .

**\*N.B.** Compound **20c** could not be isolated as a pure product, but in mixture with a second bromination product. The loss of complete chemoselectivity might be due to a higher reactivity of the more electron-rich starting material **19c**, as shown in the voltammograms reported in Figure S3.

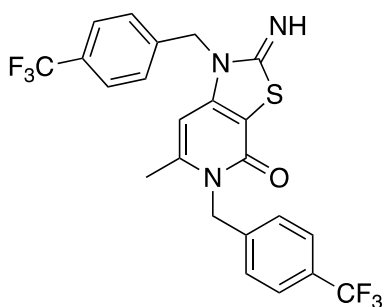

### Compound 7

#### 2-imino-6-methyl-1,5-bis(4-(trifluoromethyl)benzyl)-1,2-dihydrothiazolo[5,4-c]pyridin-4(5H)-one

According to GP2, with compound **5c** as starting material (44.0 mg), using KSCN (19.44 mg) as supporting electrolyte, after electrolyzing the reaction mixture for 4 F/mol, the title compound (13.43 mg) was isolated by flash chromatography (Petroleum ether/AcOEt 9/1- 8-2) in 27 % yield. Yellow solid. m.p. 155-160 °C. <sup>1</sup>H NMR (400 MHz, CDCl<sub>3</sub>) δ 7.54 (2H, d, *J* = 8.28 Hz), 7.49 (2H, d, *J* = 8.28 Hz), 7.32 (2H, d, *J* = 8.28 Hz), 7.20 (2H, d, *J* = 8.28 Hz), 7.57 (1H, s), 5.30 (2H, s), 5.08 (2H, s), 2.18 (3H, s). <sup>1</sup>H NMR (400 MHz, DMSO-*d*<sub>6</sub>) δ 8.84 (1H, bs), 7.74-7.70 (4H, m), 7.53 (2H, d, *J* = 7.97 Hz), 7.35 (2H, d, *J* = 7.97 Hz), 6.47 (1H, s), 5.37 (2H, s), 5.18 (2H, s), 2.26 (3H, s). <sup>13</sup>C NMR (100.6 MHz, CDCl<sub>3</sub>) δ 163.0, 156.9, 146.7, 146.0, 140.3, 139.5, 130.1 (2C, q, *J*<sub>C-F</sub> = 32.39 Hz), 127.03, 126.9, 126.0 (2C), 125.9, 122.4 (2C, q, *J*<sub>C-F</sub> = 272.1 Hz), 103.9, 94.4, 46.8, 45.8, 21.3. <sup>19</sup>F NMR (564 MHz, CDCl<sub>3</sub>) δ -62.53 (3F, s), -62.54 (3F, s). MS (ESI) *m/z* 498.1 [M+H]<sup>+</sup>.

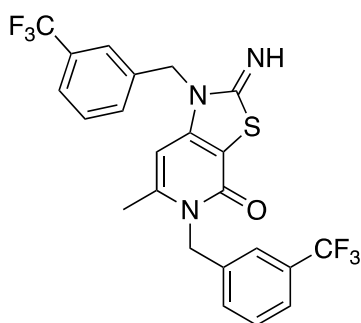

### Compound 21a

#### 2-imino-6-methyl-1,5-bis(3-(trifluoromethyl)benzyl)-1,2-dihydrothiazolo[5,4-c]pyridin-4(5H)-one

According to GP2, with compound **19a** as starting material (44.0 mg), using KSCN (19.44 mg) as supporting electrolyte, after electrolyzing the reaction mixture for 4 F/mol, the title compound (14.00 mg) was isolated by flash chromatography (dichloromethane/methanol 98/2) in 28 % yield. White solid. m.p. 155-158 °C. <sup>1</sup>H NMR (400 MHz, CDCl<sub>3</sub>) δ 7.49-7.35 (7H, m), 7.27-7.25 (1H, m), 5.77 (1H, s), 5.30 (2H, bs), 5.08 (2H, s), 2.20 (3H, s). <sup>13</sup>C NMR (100.6 MHz, CDCl<sub>3</sub>) δ 163.1, 156.9, 146.7, 145.9, 137.3, 136.6, 131.3 (q, *J*<sub>C-F</sub> = 32.79 Hz), 131.2 (q, *J*<sub>C-F</sub> = 32.46 Hz), 130.0, 129.9, 129.5, 124.8 (2C), 124.6 (2C), 123.8 (2C, q, *J*<sub>C-F</sub> = 273.0 Hz), 123.7, 123.6, 123.4 (2C), 104.0, 94.4, 46.8, 45.9, 21.3. <sup>19</sup>F NMR (564 MHz, CDCl<sub>3</sub>) δ -62.52 (3F, s), -62.55 (3F, s). MS (ESI) *m/z* 498.2 [M+H]<sup>+</sup>.

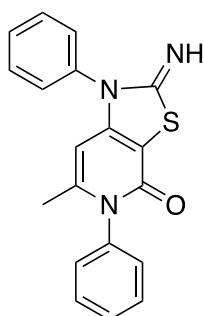

### Compound 21b

#### 2-imino-6-methyl-1,5-diphenyl-1,2-dihydrothiazolo[5,4-c]pyridin-4(5H)-one

According to GP2, with compound **19b** as starting material (27.3 mg), using KSCN (19.44 mg) as supporting electrolyte, after electrolyzing the reaction mixture for 4 F/mol, the title compound (9.00 mg) was isolated by flash chromatography (petroleum ether/AcOEt/Et<sub>3</sub>N 40/60/1) in 27 % yield. White solid. m.p. 160-163 °C. <sup>1</sup>H NMR (400 MHz, CDCl<sub>3</sub>) δ 7.55-7.51 (2H, m), 7.47-7.38 (4H, m), 7.35-7.32 (2H, m), 7.14-7.12 (2H, m), 5.56 (1H, s), 1.82 (3H, s). <sup>13</sup>C NMR (100.6 MHz, CDCl<sub>3</sub>) δ 164.6, 157.3, 147.5, 145.8, 138.1, 130.3, 129.8, 129.5, 129.0, 128.5, 128.1, 104.3, 94.5, 22.0. MS (ESI) *m/z* 334.1 [M+H]<sup>+</sup>.

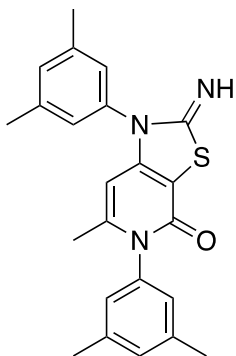

### Compound 21c

#### 1,5-bis(3,5-dimethylphenyl)-2-imino-6-methyl-1,2-dihydrothiazolo[5,4-c]pyridin-4(5H)-one

According to GP2, with compound **19c** as starting material (33.2 mg), using KSCN (19.44 mg) as supporting electrolyte, after electrolyzing the reaction mixture for 4 F/mol, the title compound (8.00 mg) was isolated by flash chromatography (petroleum ether/AcOEt/Et<sub>3</sub>N 50/50/1) in 21 % yield. Yellow solid. m.p. 103-108 °C. <sup>1</sup>H NMR (400 MHz, CDCl<sub>3</sub>) δ 7.06 (1H, s), 6.99 (1H, s), 6.91 (2H, s), 6.73 (2H, s), 5.51 (1H, s), 2.33 (6H, s), 2.27 (6H, s), 1.84, 3H, s). <sup>13</sup>C NMR (100.6 MHz, CDCl<sub>3</sub>) δ 157.4, 147.6, 145.8, 140.3, 139.5, 138.0, 131.3, 130.7, 126.0, 125.6, 104.1, 94.4, 21.9, 21.3 (2C). MS (ESI) *m/z* 390.2 [M+H]<sup>+</sup>.

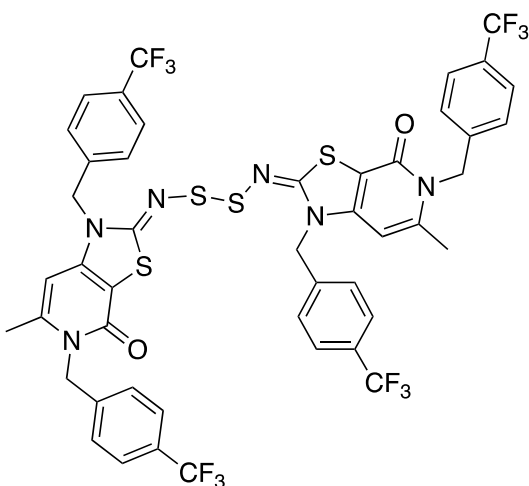

### Compound 17

#### (2Z,2'E)-2,2'-(disulfaneyldiylbis(azaneylylidene))bis(6-methyl-1,5-bis(4-(trifluoromethyl)benzyl)-1,2-dihydrothiazolo[5,4-c]pyridin-4(5H)-one)

According to GP2, with compound **5c** as starting material (44.0 mg), using KSCN (19.44 mg) as supporting electrolyte, after electrolyzing the reaction mixture for 4 F/mol, the title compound (14.26 mg) was isolated by flash chromatography (Petroleum ether/Acetone 9/1- 8-2) in 27 % yield. Yellow solid. m.p. 156-159 °C. <sup>1</sup>H NMR (400 MHz, CDCl<sub>3</sub>) δ 7.49 (4H, d, *J* = 8.71 Hz), 7.42 (4H, d, *J* =

7.66 Hz), 7.27 (4H, d,  $J = 7.66$  Hz), 7.20 (4H, d,  $J = 8.71$  Hz), 5.82 (2H, s), 5.32 (4H, s), 5.17 (4H, s), 2.20 (6H, s).  $^{13}\text{C}$  NMR (100.6 MHz,  $\text{CDCl}_3$ )  $\delta$  171.2, 157.3, 146.3 (2C), 140.1, 138.9, 130.1 (2C, q,  $J_{\text{C-F}} = 32.39$  Hz), 127.2, 126.8, 125.9 (2C), 125.3-122.5 (2C, q,  $J_{\text{C-F}} = 271.49$  Hz), 106.5, 94.2, 47.2, 46.9, 21.4.  $^{19}\text{F}$  NMR (564 MHz,  $\text{CDCl}_3$ )  $\delta$  -62.56 (6F, s), -62.58 (6F, s). MS (ESI)  $m/z$  1079.0  $[\text{M}+\text{Na}]^+$ .

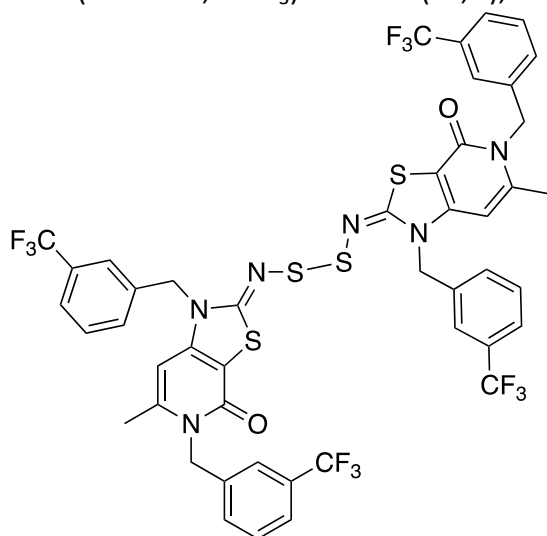

#### Compound 22a

##### **(2Z,2'E)-2,2'-(disulfanediylbis(azaneylylidene))bis(6-methyl-1,5-bis(3-(trifluoromethyl)benzyl)-1,2-dihydrothiazolo[5,4-c]pyridin-4(5H)-one)**

According to GP2, with compound **19a** as starting material (44.0 mg), using KSCN (19.44 mg) as supporting electrolyte, after electrolyzing the reaction mixture for 4 F/mol, the title compound (8.9 mg) was isolated by flash chromatography (Petroleum ether/Acetone 9/1- 8-2) in 17 % yield. Yellow solid. m.p. 110-115 °C.  $^1\text{H}$  NMR (400 MHz,  $\text{CDCl}_3$ )  $\delta$  7.46-7.42 (8H, m), 7.39-7.36 (6H, m), 7.24 (2H, d,  $J = 7.93$  Hz), 5.84 (2H, s), 5.32 (4H, s), 5.18 (4H, s), 2.21 (6H, s).  $^{13}\text{C}$  NMR (100.6 MHz,  $\text{CDCl}_3$ )  $\delta$  171.4, 157.3, 146.3, 146.2, 137.2, 136.0, 130.3, 129.8, 129.7, 129.6, 125.2, 124.9 (2C), 124.6, 123.8 (2C), 123.4 (2C), 122.5, 106.6, 94.3, 47.9, 46.9, 21.4.  $^{19}\text{F}$  NMR (564 MHz,  $\text{CDCl}_3$ )  $\delta$  -62.53 (12F, s). MS (ESI)  $m/z$  1079.0  $[\text{M}+\text{Na}]^+$ .

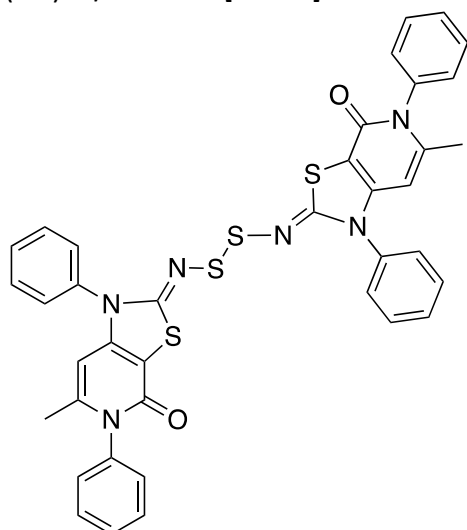

#### Compound 22b

##### **(2Z,2'Z)-2,2'-(disulfanediylbis(azaneylylidene))bis(6-methyl-1,5-diphenyl-1,2-dihydrothiazolo[5,4-c]pyridin-4(5H)-one)**

According to GP2, with compound **19b** as starting material (27.3 mg), using KSCN (19.44 mg) as supporting electrolyte, after electrolyzing the reaction mixture for 4 F/mol, the title compound (3.5 mg) was isolated by flash chromatography (Petroleum ether/AcOEt 5/5) in 10 % yield. Yellow solid.

m.p. 164-166 °C. <sup>1</sup>H NMR (400 MHz, CDCl<sub>3</sub>) δ 7.48-7.44 (8H, m), 7.41-7.37 (4H, m), 7.36-7.34 (4H, m), 7.15-7.13 (4H, m), 5.59 (2H, s), 1.81 (6H, s). <sup>13</sup>C NMR (100.6 MHz, CDCl<sub>3</sub>) δ 173.6, 157.6, 147.5, 145.8, 138.2, 135.1, 130.2, 129.9, 129.5, 129.1, 128.4, 128.1, 106.7, 94.6, 22.1. MS (ESI) *m/z* 729.2 [M+H]<sup>+</sup>, 751.2 [M+Na]<sup>+</sup>.

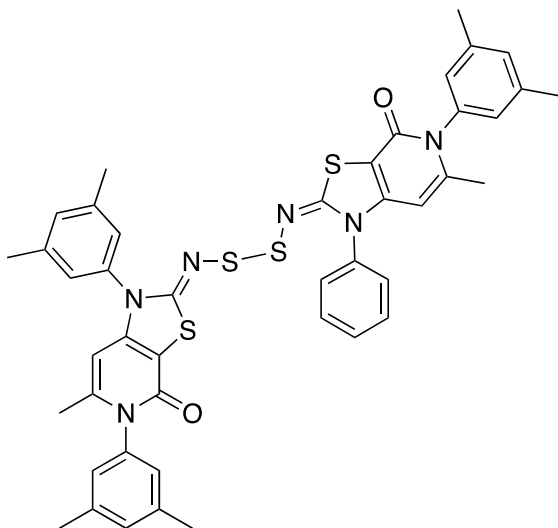

#### Compound 22c

**(*E*)-2-((((*Z*)-1,5-bis(3,5-dimethylphenyl)-6-methyl-4-oxo-4,5-dihydrothiazolo[5,4-*c*]pyridin-2(1*H*)-ylidene)amino)disulfaneyl)imino)-5-(3,5-dimethylphenyl)-6-methyl-1-phenyl-1,2-dihydrothiazolo[5,4-*c*]pyridin-4(5*H*)-one**

According to GP2, with compound **19c** as starting material (33.2 mg), using KSCN (19.44 mg) as supporting electrolyte, after electrolyzing the reaction mixture for 4 F/mol, the title compound (4.0 mg) was isolated by flash chromatography (Petroleum ether/AcOEt 6/4) in 10 % yield. Yellow solid. m.p. 179-183 °C. <sup>1</sup>H NMR (400 MHz, CDCl<sub>3</sub>) δ 6.99 (4H, s), 6.74 (4H, s), 6.72 (4H, s), 5.52 (2H, s), 2.28 (12H, s), 2.27 (12H, s), 1.83 (6H, s). <sup>13</sup>C NMR (100.6 MHz, CDCl<sub>3</sub>) δ 174.8, 157.6, 147.7, 145.8, 139.9, 139.5, 138.0, 134.9, 131.4, 130.7, 125.9, 125.6, 106.6, 94.5, 29.7, 22.0, 21.3. MS (ESI) *m/z* 813.2 [M+H]<sup>+</sup>.

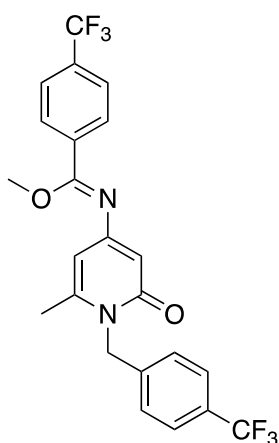

#### Compound 8

**methyl (Z)-N-(6-methyl-2-oxo-1-(4-(trifluoromethyl)benzyl)-1,2-dihydropyridin-4-yl)-4-(trifluoromethyl)benzimidate**

According to GP3, with compound **5c** as starting material (44.0 mg), using NaCN (9.80 mg) as supporting electrolyte, after electrolyzing the reaction mixture for 8 F/mol, the title compound (10.0 mg) was isolated by flash chromatography (petroleum ether/ethyl acetate 60/40 – 50/50) in 20 %

yield. Yellowish solid. m.p. 80-90 °C.  $^1\text{H}$  NMR (400 MHz,  $\text{CDCl}_3$ )  $\delta$  7.5 (4H, s), 7.48 (2H,  $J = 8.00$  Hz, s), 7.13 (2H, d,  $J = 8.00$  Hz), 5.71 (1H, d,  $J = 2.00$  Hz), 5.62 (1H, s), 5.25 (2H, s), 3.89 (3H, s), 2.11 (3H, s).  $^{13}\text{C}$  NMR (100.6 MHz,  $\text{CDCl}_3$ )  $\delta$  163.0, 156.6, 156.5, 145.1, 139.5, 132.4, 131.5, 128.4 (2C, q,  $J_{\text{C-F}} = 33.34$  Hz), 128.0, 125.3, 124.49, 124.46, 124.0 (2C, q,  $J_{\text{C-F}} = 270.1$  Hz), 103.7, 103.3, 53.4, 45.0, 28.4, 19.3.  $^{19}\text{F}$  NMR (564 MHz,  $\text{CDCl}_3$ )  $\delta$  -62.53 (3F, s), -62.54 (3F, s). MS (ESI)  $m/z$  469.2  $[\text{M}+\text{H}]^+$ .

#### MCR-LSF:

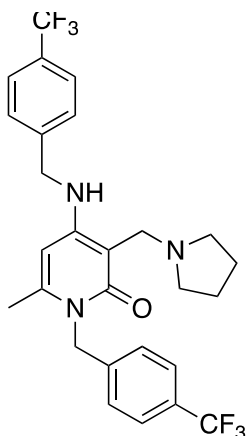

#### Compound 9a

##### 6-methyl-3-(pyrrolidin-1-ylmethyl)-1-(4-(trifluoromethyl)benzyl)-4-((4-(trifluoromethyl)benzyl)amino)pyridin-2(1H)-one

According to GP4, using pyrrolidine (14.22 mg, 16.42  $\mu\text{L}$ ) as amine and **5c** as substrate (44.04 mg), the title compound (38.3 mg) was isolated by flash chromatography (dichloromethane/methanol 90/10) in 73% yield after 40 minutes of reaction. White solid. m.p. 120-123 °C.  $^1\text{H}$  NMR (400 MHz,  $\text{CDCl}_3$ )  $\delta$  8.19 (1H, s), 7.62 (2H, d,  $J = 7.79$  Hz), 7.56 (2H, d,  $J = 7.79$  Hz), 7.45 (2H, d,  $J = 8.12$  Hz), 7.25 (2H, d,  $J = 8.12$  Hz), 5.60 (1H, s), 5.30 (2H, s), 4.52 (2H, d,  $J = 5.91$  Hz), 4.03 (2H, s), 2.87 (4H, s), 2.15 (3H, s), 1.88 (4H, s).  $^{13}\text{C}$  NMR (100.6 MHz,  $\text{CDCl}_3$ )  $\delta$  163.4, 154.6, 146.7, 141.8, 140.0, 128.7, (q,  $J_{\text{C-F}} = 30.79$  Hz), 128.4 (q,  $J_{\text{C-F}} = 32.02$  Hz), 126.1, 125.3, 124.8 (2C), 124.6 (2C), 123.11 (q,  $J_{\text{C-F}} = 272.1$  Hz), 122.9 (q,  $J_{\text{C-F}} = 272.1$  Hz), 95.5, 92.0, 51.5, 48.8, 45.7, 45.0, 22.1, 20.2.  $^{19}\text{F}$  NMR (564 MHz,  $\text{CDCl}_3$ )  $\delta$  -62.33 (3F, s), -62.50 (3F, s). MS (ESI)  $m/z$  524.2  $[\text{M}+\text{H}]^+$ .

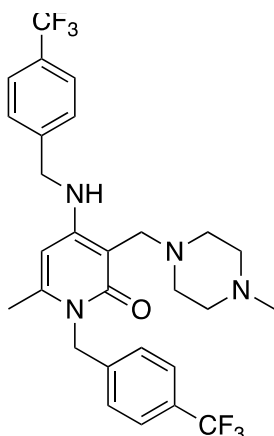

#### Compound 9b

##### 6-methyl-3-((4-methylpiperazin-1-yl)methyl)-1-(4-(trifluoromethyl)benzyl)-4-((4-(trifluoromethyl)benzyl)amino)pyridin-2(1H)-one

According to GP4, using 1-methylpiperazine as amine (20.03 mg, 22.26  $\mu\text{L}$ ) and **5c** as substrate (44.04 mg), the title compound (36.0 mg) was isolated by flash chromatography

(dichloromethane/methanol 90:10) in 65% yield after 40 minutes. White solid. m.p. 134-136 °C.  $^1\text{H}$  NMR (400 MHz,  $\text{CDCl}_3$ )  $\delta$  7.97 (1H, t,  $J = 5.67$  Hz), 7.55 (2H, d,  $J = 8.09$  Hz), 7.46 (2H, d,  $J = 8.09$  Hz), 7.37 (2H, d,  $J = 8.09$ ), 7.16 (2H, d,  $J = 8.09$ ), 5.52 (1H, s), 5.21 (2H, s), 4.39 (2H, d,  $J = 5.67$  Hz), 3.70 (2H, s), 2.49-2.11 (8H, m), 2.15 (3H, s), 2.07 (3H, s).  $^{13}\text{C}$  NMR (100.6 MHz,  $\text{CDCl}_3$ )  $\delta$  163.2, 154.9, 145.3, 143.1, 141.8, 129.7 (q,  $J_{\text{C-F}} = 32.06$  Hz), 129.4 (q,  $J_{\text{C-F}} = 32.06$  Hz), 127.2, 126.7, 125.7, 124.1 (2C, q,  $J_{\text{C-F}} = 271.4$  Hz), 95.6, 55.1, 54.2, 52.1, 46.5, 46.1, 45.9, 21.1.  $^{19}\text{F}$  NMR (564 MHz,  $\text{CDCl}_3$ )  $\delta$  -62.36 (3F, s), -62.42 (3F, s). MS (ESI)  $m/z$  553.2  $[\text{M}+\text{H}]^+$ .

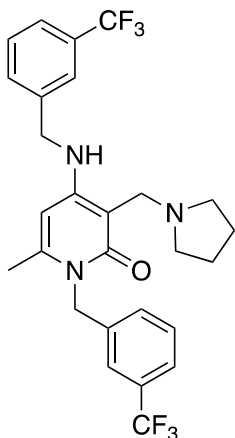

#### Compound 25a

#### 6-methyl-3-(pyrrolidin-1-ylmethyl)-1-(3-(trifluoromethyl)benzyl)-4-((3-(trifluoromethyl)benzyl)amino)pyridin-2(1H)-one

According to GP4, using pyrrolidine (14.22 mg, 16.42  $\mu\text{L}$ ) as amine and compound **19a** as substrate (44.04 mg), the title compound (29.0 mg) was isolated by flash chromatography (dichloromethane/methanol 95/5) in 55% yield after 40 minutes of reaction. Yellow oil.  $^1\text{H}$  NMR (400 MHz,  $\text{CDCl}_3$ )  $\delta$  8.09 (1H, s), 7.48-7.37 (5H, m), 7.33 (1H, t,  $J = 7.80$  Hz), 7.28 (1H, s), 7.21 (1H, d,  $J = 7.80$  Hz), 5.53 (1H, s), 5.22 (2H, s), 4.42 (2H, d,  $J = 6.32$  Hz), 3.93 (2H, s), 2.75 (4H, bs), 2.06 (3H, s), 1.77 (4H, bs).  $^{13}\text{C}$  NMR (100.6 MHz,  $\text{CDCl}_3$ )  $\delta$  163.3, 155.0, 145.7, 140.1, 138.6, 131.1 (q,  $J_{\text{C-F}} = 31.14$  Hz), 130.1, 129.7, 129.3, 129.2, 124.1, 124.1 (q,  $J_{\text{C-F}} = 271.16$  Hz), 124.0 (q,  $J_{\text{C-F}} = 271.16$  Hz), 123.4, 123.0, 96.0, 53.0, 46.5, 46.0, 29.7, 23.5, 21.1.  $^{19}\text{F}$  NMR (564 MHz,  $\text{CDCl}_3$ )  $\delta$  -62.43 (3F, s), -62.50 (3F, s). MS (ESI)  $m/z$  524.3  $[\text{M}+\text{H}]^+$ .

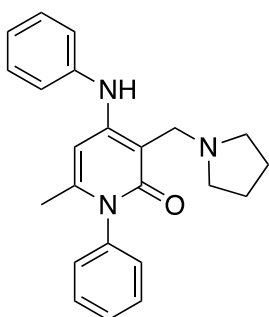

#### Compound 25b

#### 6-methyl-1-phenyl-4-(phenylamino)-3-(pyrrolidin-1-ylmethyl)pyridin-2(1H)-one

According to GP4, using pyrrolidine (14.22 mg, 16.42  $\mu\text{L}$ ) as amine and compound **19b** as substrate (27.30 mg), the title compound (21.5 mg) was isolated by flash chromatography (dichloromethane/methanol 96/4 – 90/10) in 60% yield after 40 minutes of reaction. Yellow oil.  $^1\text{H}$  NMR (400 MHz,  $\text{CDCl}_3$ )  $\delta$  9.96 (1H, bs), 7.42-7.38 (2H, m), 7.33 (1H, d,  $J = 7.35$  Hz), 7.30-7.25 (2H, m), 7.21-7.08 (4H, m), 7.02 (1H, t,  $J = 7.35$  Hz), 6.05 (1H, s), 3.87 (2H, s), 2.72 (4H, bs), 1.81 (4H, bs), 1.78

(3H, s).  $^{13}\text{C}$  NMR (100.6 MHz,  $\text{CDCl}_3$ )  $\delta$  164.1, 153.3, 145.1, 140.5, 139.3, 129.5, 129.3, 128.4, 128.3, 123.5, 122.5, 96.8, 53.1, 51.1, 23.7, 21.8. MS (ESI)  $m/z$  360.2  $[\text{M}+\text{H}]^+$ .

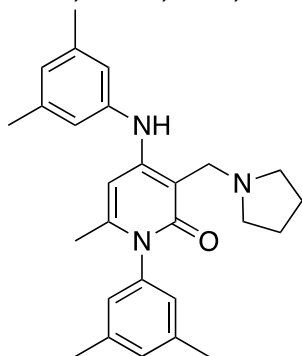

### Compound 25c

#### 1-(3,5-dimethylphenyl)-4-((3,5-dimethylphenyl)amino)-6-methyl-3-(pyrrolidin-1-ylmethyl)pyridin-2(1H)-one

According to GP4, using pyrrolidine (14.22 mg, 16.42  $\mu\text{L}$ ) as amine and **19c** as substrate (32.24 mg), the title compound (27.8 mg) was isolated by flash chromatography (dichloromethane/methanol 96/4 – 90/10) in 67% yield after 40 minutes of reaction. Yellow oil.  $^1\text{H}$  NMR (400 MHz,  $\text{CDCl}_3$ )  $\delta$  9.94 (1H, s), 7.03 (1H, s), 6.83 (2H, s), 6.77 (3H, s), 6.11 (1H, s), 3.90 (2H, s), 2.73 (4H, bs), 2.36 (6H, s), 2.34 (6H, s), 1.89 (3H, s), 1.88 (4H, s).  $^{13}\text{C}$  NMR (100.6 MHz,  $\text{CDCl}_3$ )  $\delta$  164.0, 152.9, 144.7, 140.5, 139.3, 139.1, 139.0, 129.9, 125.9, 125.2, 120.2, 96.8, 53.1, 51.2, 23.8, 21.8, 21.4, 21.2. MS (ESI)  $m/z$  416.3  $[\text{M}+\text{H}]^+$ .

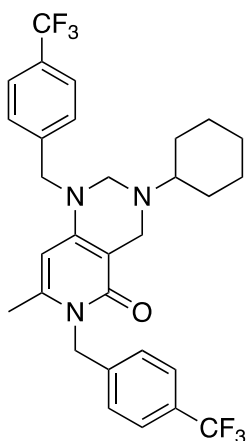

### Compound 10a

#### 3-cyclohexyl-7-methyl-1,6-bis(4-(trifluoromethyl)benzyl)-2,3,4,6-tetrahydropyrido[4,3-d]pyrimidin-5(1H)-one

According to GP5, using cyclohexylamine as amine (19.83 mg, 22.93  $\mu\text{L}$ ) and **5c** as substrate (44.04 mg, 0.1mmol), the title compound (24.0 mg) was isolated by flash chromatography (ethyl acetate/methanol 98/2 – 95/5) in 63% yield after 40 minutes of reaction. White solid. m.p. 155-158  $^\circ\text{C}$ .  $^1\text{H}$  NMR (400 MHz,  $\text{CDCl}_3$ )  $\delta$  7.64 (2H, d,  $J = 7.95$  Hz), 7.57 (2H, d,  $J = 7.95$  Hz), 7.40 (2H, d,  $J = 7.95$  Hz), 7.28 (2H, d,  $J = 7.95$  Hz), 5.62 (1H, s), 5.33 (2H, s), 4.53 (2H, s), 4.16 (2H, s), 3.90 (2H, s), 2.55-2.51 (1H, m), 2.15 (3H, s), 1.95 (2H, m), 1.79 (2H, m), 1.63 (1H, m), 1.33-1.13 (5H, m).  $^{13}\text{C}$  NMR (100.6 MHz,  $\text{CDCl}_3$ )  $\delta$  161.6, 150.7, 143.8, 142.0, 141.7, 129.8 (q,  $J_{\text{C-F}} = 39.65$  Hz), 129.5 (q,  $J_{\text{C-F}} = 39.65$  Hz), 129.3, 126.8, 125.9, 125.8, 125.7 (2C), 124.1 (2C, q,  $J_{\text{C-F}} = 271.6$  Hz), 99.7, 96.2, 66.8, 59.4, 52.3, 46.0, 30.3, 26.0, 25.5, 20.9.  $^{19}\text{F}$  NMR (564 MHz,  $\text{CDCl}_3$ )  $\delta$  -62.40 (3F, s), -62.42 (3F, s). MS (ESI)  $m/z$  564.2  $[\text{M}+\text{H}]^+$ .



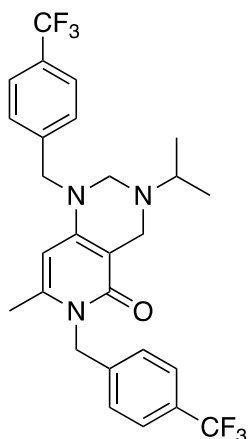

### Compound 10b

#### 3-isopropyl-7-methyl-1,6-bis(4-(trifluoromethyl)benzyl)-2,3,4,6-tetrahydropyrido[4,3-d]pyrimidin-5(1H)-one

According to GP5, using isopropylamine as amine (11.82 mg, 17.03  $\mu\text{L}$ ) and **5c** as substrate (44.04 mg), the title compound (20.5 mg) was isolated by flash chromatography (ethyl acetate/methanol 100/0 – 97/3) in 40% yield after 20 minutes of reaction. White solid. m.p. 83-87  $^{\circ}\text{C}$ .  $^1\text{H}$  NMR (400 MHz,  $\text{CDCl}_3$ )  $\delta$  7.64 (2H, d,  $J = 8.11$  Hz), 7.57 (2H, d,  $J = 8.11$  Hz), 7.41 (2H, d,  $J = 8.11$  Hz), 7.28 (2H, d,  $J = 8.11$  Hz), 5.63 (1H, s), 5.34 (2H, s), 4.57 (2H, s), 4.10 (2H, s), 3.85 (2H, s), 3.00-2.95 (1H, m), 2.15 (3H, s), 1.18 (3H, s), 1.16 (3H, s).  $^{13}\text{C}$  NMR (100.6 MHz,  $\text{CDCl}_3$ )  $\delta$  161.6, 150.5, 143.8, 141.9, 141.6, 129.8 (q,  $J_{\text{C-F}} = 39.83$  Hz), 129.5 (q,  $J_{\text{C-F}} = 40.06$  Hz), 126.8, 125.9 (2C), 125.7 (2C), 124.1 (2C, q,  $J_{\text{C-F}} = 277.54$  Hz), 99.9, 96.2, 67.1, 52.5, 51.4, 46.1, 29.7, 20.9, 19.9.  $^{19}\text{F}$  NMR (564 MHz,  $\text{CDCl}_3$ )  $\delta$  -62.40 (3F, s), -62.41 (3F, s). MS (ESI)  $m/z$  524.2  $[\text{M}+\text{H}]^+$ .

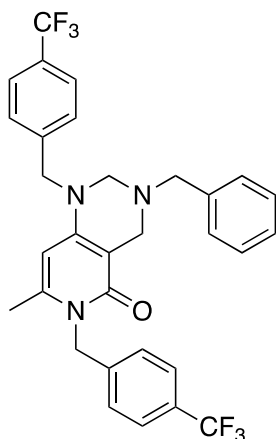

### Compound 10c

#### 3-benzyl-7-methyl-1,6-bis(4-(trifluoromethyl)benzyl)-2,3,4,6-tetrahydropyrido[4,3-d]pyrimidin-5(1H)-one

According to GP5, using benzylamine as amine (21.43 mg, 21.85  $\mu\text{L}$ ) and **5c** as substrate (44.04 mg), the title compound (42.0 mg) was isolated by flash chromatography (ethyl acetate 100%) in 73% yield after 10 minutes of reaction. White solid. m.p. 145-148  $^{\circ}\text{C}$ .  $^1\text{H}$  NMR (400 MHz,  $\text{CDCl}_3$ )  $\delta$  7.62 (2H, d,  $J = 8.23$  Hz), 7.59 (2H, d,  $J = 8.23$  Hz), 7.36 (2H, d,  $J = 7.99$  Hz), 7.31-7.26 (7H, m), 5.67 (1H, s), 5.34 (2H, s), 4.46 (2H, s), 4.03 (2H, s), 3.92 (2H, s), 3.77 (2H, s), 2.18 (3H, s).  $^{13}\text{C}$  NMR (100.6 MHz,  $\text{CDCl}_3$ )  $\delta$  161.8, 150.3, 144.04, 141.9, 141.7, 137.8, 130.0 (2C, q,  $J_{\text{C-F}} = 32.06$  Hz), 129.0, 128.4, 127.7, 127.4, 126.8, 125.8 (3C), 125.7 (2C), 124.2 (q,  $J_{\text{C-F}} = 272.03$  Hz), 124.1 (q,  $J_{\text{C-F}} = 271.36$  Hz), 98.4, 96.0, 68.1, 57.8, 52.1, 49.7, 46.2, 21.0.  $^{19}\text{F}$  NMR (564 MHz,  $\text{CDCl}_3$ )  $\delta$  -62.39 (3F, s), -62.40 (3F, s). MS (ESI)  $m/z$  572.2  $[\text{M}+\text{H}]^+$ .

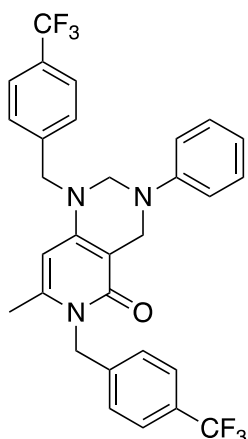

### Compound 10d

#### 7-methyl-3-phenyl-1,6-bis(4-(trifluoromethyl)benzyl)-2,3,4,6-tetrahydropyrido[4,3-*d*]pyrimidin-5(1*H*)-one

According to GP5, using aniline as amine (8.63 mg, 18.26  $\mu$ L) and **5c** as substrate (44.04 mg), the title compound (32.4mg) was isolated by flash chromatography (petroleum ether/ethyl acetate 40/60) in 58% yield after 10 minutes of reaction. White solid. m.p. 160-165  $^{\circ}$ C.  $^1\text{H}$  NMR (400 MHz,  $\text{CDCl}_3$ )  $\delta$  7.59 (2H, d,  $J = 8.09$  Hz), 7.54 (2H, d,  $J = 8.09$  Hz), 7.31 (2H, d,  $J = 8.09$  Hz), 7.26 (2H, m), 7.22 (2H, d,  $J = 8.09$  Hz), 6.98 (2H, d,  $J = 8.09$  Hz), 6.94 (2H, t,  $J = 7.74$  Hz), 5.58 (1H, s), 5.36 (2H, s), 4.76 (2H, s), 4.54 (2H, s), 4.50 (2H, s), 2.14 (3H, s).  $^{13}\text{C}$  NMR (100.6 MHz,  $\text{CDCl}_3$ )  $\delta$  161.5, 151.0, 148.7, 144.3, 141.5, 129.9 (2C, q,  $J_{\text{C-F}} = 32.09$  Hz), 126.8, 125.8 (3C), 124.1 (2C, q,  $J_{\text{C-F}} = 272.2$  Hz), 121.0, 117.8, 99.0, 96.2, 67.8, 51.8, 46.5, 46.2, 29.7, 20.9.  $^{19}\text{F}$  NMR (564 MHz,  $\text{CDCl}_3$ )  $\delta$  -62.41 (6F, bs). MS (ESI)  $m/z$  558.2  $[\text{M}+\text{H}]^+$ .

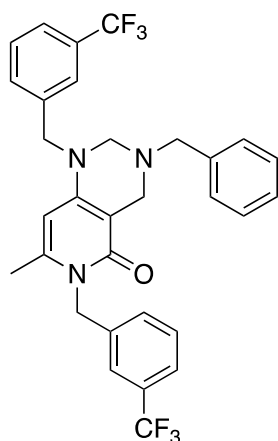

### Compound 26a

#### 3-benzyl-7-methyl-1,6-bis(3-(trifluoromethyl)benzyl)-2,3,4,6-tetrahydropyrido[4,3-*d*]pyrimidin-5(1*H*)-one

According to GP5, using benzylamine as amine (21.43 mg, 21.85  $\mu$ L) and **19a** as substrate (44.04 mg), the title compound (45.9 mg) was isolated by flash chromatography (dichloromethane/ethyl acetate 1/1) in 80% yield after 10 minutes of reaction. Yellow oil.  $^1\text{H}$  NMR (600 MHz,  $\text{CDCl}_3$ )  $\delta$  7.53 (1H, d,  $J = 8.10$  Hz), 7.49 (1H, d,  $J = 7.26$  Hz), 7.46 (2H, t,  $J = 7.74$  Hz), 7.44-7.40 (3H, m), 7.34 (1H, d,  $J = 8.04$  Hz), 7.29-7.25 (4H, m), 7.23-7.20 (1H, m), 5.65 (1H, s), 5.30 (2H, s), 4.43 (2H, s), 4.00 (2H, s), 3.88 (2H, s), 3.74 (2H, s), 2.15 (3H, s).  $^{13}\text{C}$  NMR (150 MHz,  $\text{CDCl}_3$ )  $\delta$  161.9, 150.4, 144.1, 139.0, 138.7, 137.9, 131.1 (q,  $J_{\text{C-F}} = 32.66$  Hz), 131.1 (q,  $J_{\text{C-F}} = 31.98$  Hz), 130.0, 129.9, 129.5, 129.4, 129.0, 128.5, 127.4, 124.1 (q,  $J_{\text{C-F}} = 272.03$  Hz), 124.1 (q,  $J_{\text{C-F}} = 272.23$  Hz), 124.5, 124.2, 123.4, 123.3, 98.6, 96.1, 68.2, 57.8, 52.1, 49.6, 46.2, 21.0.  $^{19}\text{F}$  NMR (564 MHz,  $\text{CDCl}_3$ )  $\delta$  -62.55 (6F, s). MS (ESI)  $m/z$  572.3  $[\text{M}+\text{H}]^+$ .

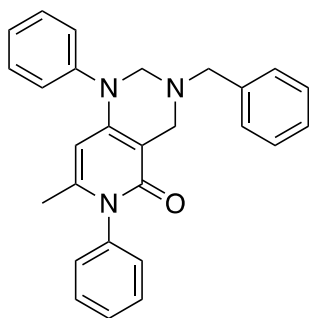

### Compound 26b

#### 3-benzyl-7-methyl-1,6-diphenyl-2,3,4,6-tetrahydropyrido[4,3-d]pyrimidin-5(1H)-one

According to GP5, using benzylamine as amine (21.43 mg, 21.85  $\mu$ L) and **19b** as substrate (27.30 mg), the title compound (31.0 mg) was isolated by flash chromatography (dichloromethane/methanol 98/2) in 76% yield after 10 minutes of reaction. White solid. m.p. 110-115  $^{\circ}$ C.  $^1$ H NMR (600 MHz,  $\text{CDCl}_3$ )  $\delta$  7.46 (2H, t,  $J = 7.80$  Hz), 7.39 (3H, t,  $J = 7.38$  Hz), 7.29 (2H, m), 7.26-7.23 (3H, m), 7.22-7.18 (5H, m), 7.67 (1H, s), 4.36 (2H, s), 3.97 (2H, s), 3.86 (2H, s), 1.80 (3H, s).  $^{13}$ C NMR (150 MHz,  $\text{CDCl}_3$ )  $\delta$  162.7, 149.7, 144.0, 143.1, 139.1, 138.3, 129.7, 129.5, 129.1, 128.6, 128.4 (2C), 127.3, 126.3, 126.1, 99.6, 97.4, 69.6, 57.2, 49.4, 21.7. MS (ESI)  $m/z$  408.2  $[\text{M}+\text{H}]^+$ .

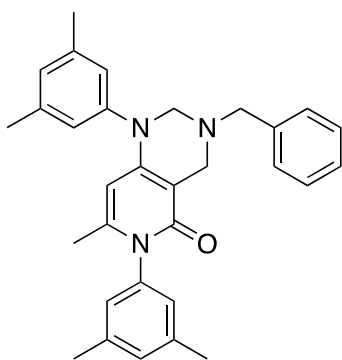

### Compound 26c

#### 3-benzyl-1,6-bis(3,5-dimethylphenyl)-7-methyl-2,3,4,6-tetrahydropyrido[4,3-d]pyrimidin-5(1H)-one

According to GP5, using benzylamine as amine (21.43 mg, 21.85  $\mu$ L) and **19c** as substrate (33.24 mg), the title compound (42.4 mg) was isolated by flash chromatography (DCM/Methanol 98/2) in 91% yield after 20 minutes of reaction. White solid. m.p. 115-120  $^{\circ}$ C.  $^1$ H NMR (400 MHz,  $\text{CDCl}_3$ )  $\delta$  7.37-7.34 (2H, m), 7.32-7.28 (2H, m), 7.26-7.24 (1H, m), 7.04 (1H, s), 6.91 (1H, s), 6.85 (2H, s), 6.84 (2H, s), 5.67 (1H, s), 3.90 (2H, s), 2.36 (6H, s), 2.35 (6H, s), 1.86 (3H, s).  $^{13}$ C NMR (100.6 MHz,  $\text{CDCl}_3$ )  $\delta$  162.7, 149.7, 143.7, 143.1, 139.3, 139.0, 138.4, 130.0, 129.1, 128.3, 127.8, 127.2, 126.0, 124.1, 98.9, 97.2, 69.7, 57.1, 49.1, 21.6, 21.3 (2C). MS (ESI)  $m/z$  464.3  $[\text{M}+\text{H}]^+$ ; 468.3  $[\text{M}+\text{Na}]^+$ .

**Table S5.** Elemental Analysis

| Cmpd.      | Elemental analysis (%) |      |       |       |      |       |
|------------|------------------------|------|-------|-------|------|-------|
|            | Calculated             |      |       | Found |      |       |
|            | C                      | H    | N     | C     | H    | N     |
| <b>5c</b>  | 60.00                  | 4.12 | 6.36  | 60.10 | 4.02 | 6.38  |
| <b>11</b>  | 59.75                  | 4.18 | 5.81  | 59.95 | 4.11 | 5.76  |
| <b>19a</b> | 60.00                  | 4.12 | 6.36  | 60.05 | 4.10 | 6.40  |
| <b>19b</b> | 78.24                  | 5.84 | 10.14 | 78.20 | 5.88 | 10.05 |
| <b>19c</b> | 79.48                  | 7.28 | 8.43  | 79.42 | 7.26 | 8.40  |
| <b>6a</b>  | 55.65                  | 3.61 | 5.90  | 55.48 | 3.67 | 5.86  |
| <b>6b</b>  | 50.89                  | 3.30 | 5.39  | 50.95 | 3.34 | 5.27  |
| <b>6c</b>  | 46.66                  | 3.03 | 4.95  | 46.63 | 3.12 | 4.90  |
| <b>13</b>  | 51.35                  | 3.41 | 4.99  | 51.43 | 3.45 | 4.92  |
| <b>20a</b> | 50.89                  | 3.30 | 5.39  | 50.86 | 3.25 | 5.42  |
| <b>20b</b> | 60.86                  | 4.26 | 7.89  | 60.80 | 4.21 | 7.92  |
| <b>20c</b> | 64.24                  | 5.64 | 6.81  | 64.22 | 5.61 | 6.78  |
| <b>7</b>   | 55.53                  | 3.44 | 8.45  | 55.48 | 3.40 | 8.65  |
| <b>21a</b> | 55.53                  | 3.44 | 8.45  | 55.50 | 3.41 | 8.50  |
| <b>21b</b> | 68.45                  | 4.53 | 12.60 | 68.41 | 4.57 | 12.60 |
| <b>21c</b> | 70.92                  | 5.95 | 10.79 | 70.90 | 5.95 | 10.75 |
| <b>17</b>  | 52.27                  | 3.05 | 7.95  | 52.35 | 3.01 | 7.78  |
| <b>22a</b> | 52.27                  | 3.05 | 7.95  | 52.25 | 3.01 | 7.91  |
| <b>22b</b> | 62.62                  | 3.87 | 11.53 | 62.60 | 3.85 | 11.49 |
| <b>22c</b> | 65.69                  | 5.27 | 9.99  | 65.64 | 5.29 | 9.95  |
| <b>8</b>   | 58.98                  | 3.87 | 5.98  | 58.96 | 3.81 | 5.77  |
| <b>9a</b>  | 61.95                  | 5.20 | 8.03  | 61.91 | 5.15 | 8.22  |
| <b>9b</b>  | 60.86                  | 5.47 | 10.14 | 60.88 | 5.43 | 10.24 |
| <b>25a</b> | 61.95                  | 5.20 | 8.03  | 61.91 | 5.15 | 8.06  |
| <b>25b</b> | 76.85                  | 7.01 | 11.69 | 76.80 | 6.99 | 11.73 |
| <b>25c</b> | 78.03                  | 8.00 | 10.11 | 78.00 | 7.95 | 10.06 |
| <b>10a</b> | 63.93                  | 3.41 | 4.99  | 63.98 | 3.45 | 4.86  |
| <b>10b</b> | 61.95                  | 5.20 | 8.03  | 61.84 | 5.23 | 8.00  |
| <b>10c</b> | 65.14                  | 4.76 | 7.35  | 65.12 | 4.73 | 7.39  |
| <b>10d</b> | 64.63                  | 4.52 | 7.54  | 64.57 | 4.49 | 7.59  |
| <b>26a</b> | 65.14                  | 4.76 | 7.35  | 65.10 | 4.71 | 7.32  |
| <b>26b</b> | 79.58                  | 6.18 | 10.31 | 79.57 | 8.16 | 10.29 |
| <b>26c</b> | 80.31                  | 7.17 | 9.06  | 80.32 | 7.19 | 9.04  |

# 7. NMR Spectra

Starting materials:  
Compound 5c

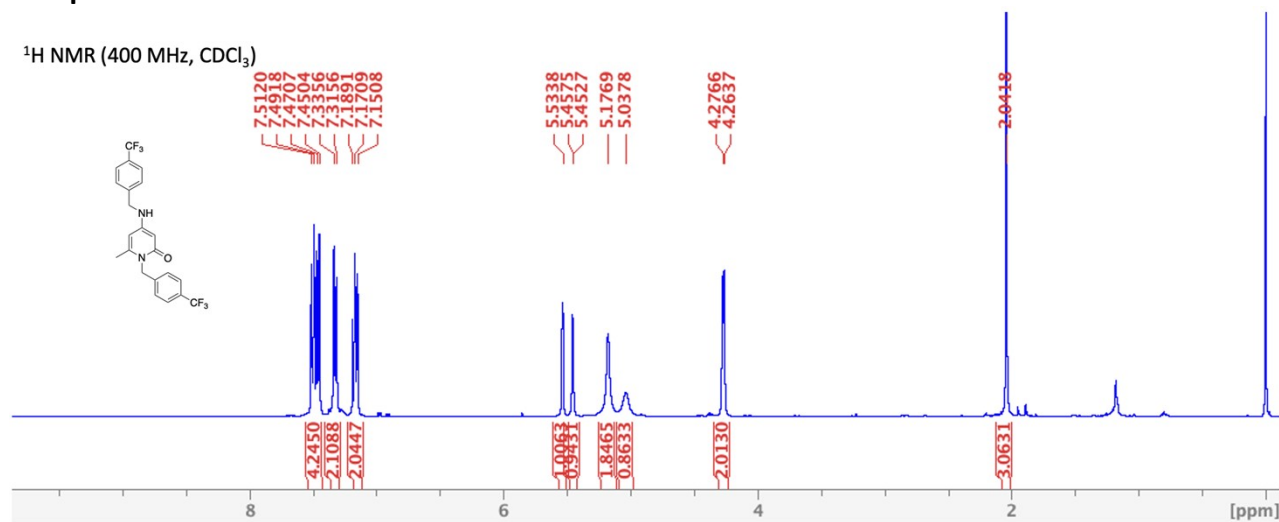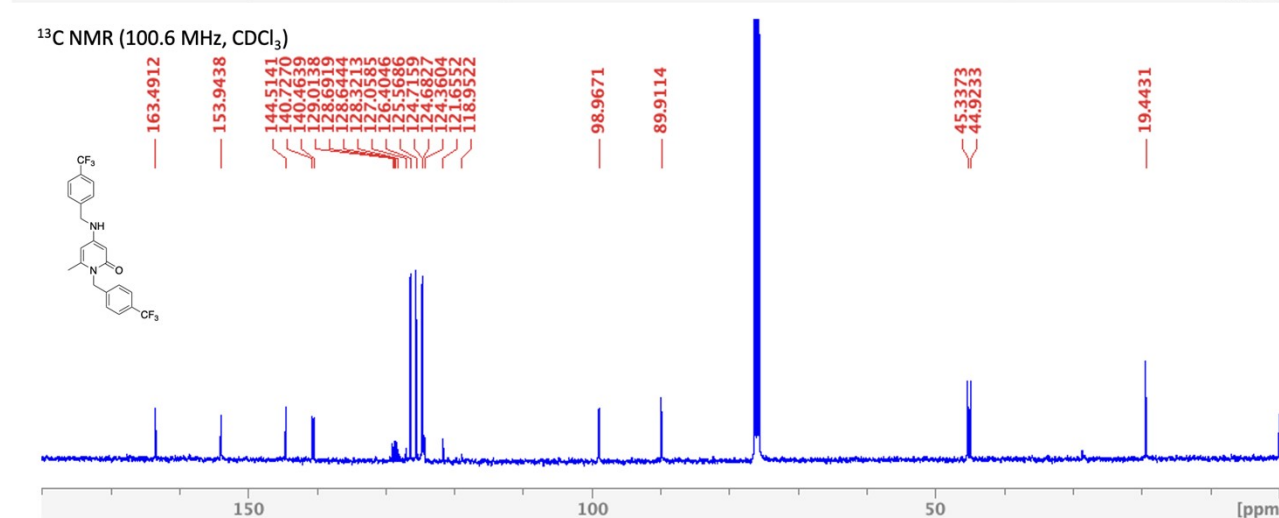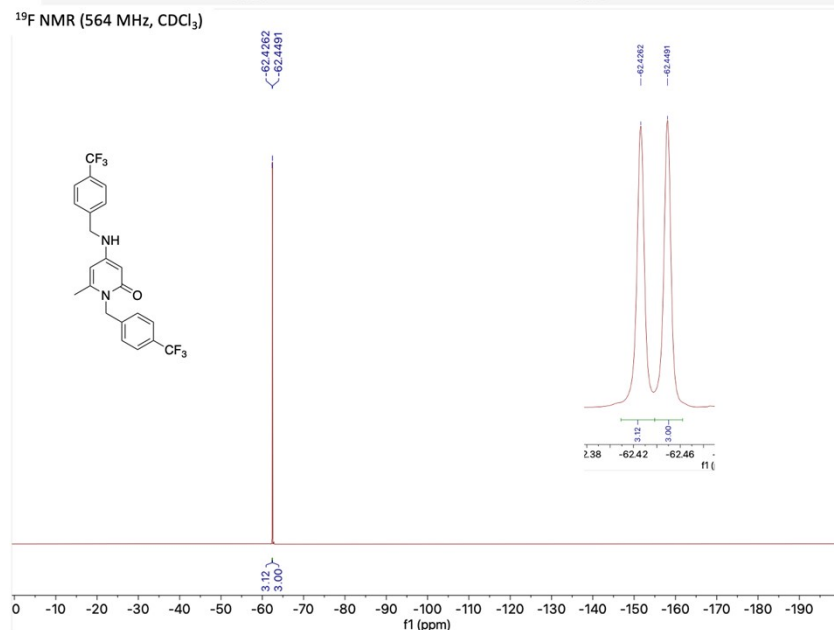

# Compound 11

<sup>1</sup>H NMR (400 MHz, CDCl<sub>3</sub>)

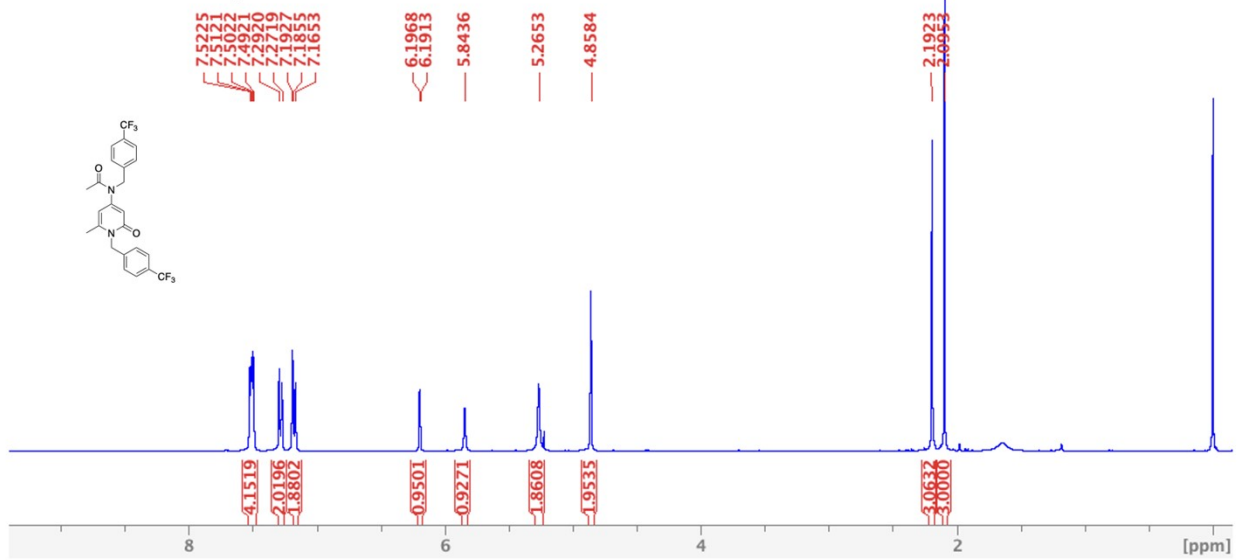

<sup>13</sup>C NMR (100.6 MHz, CDCl<sub>3</sub>)

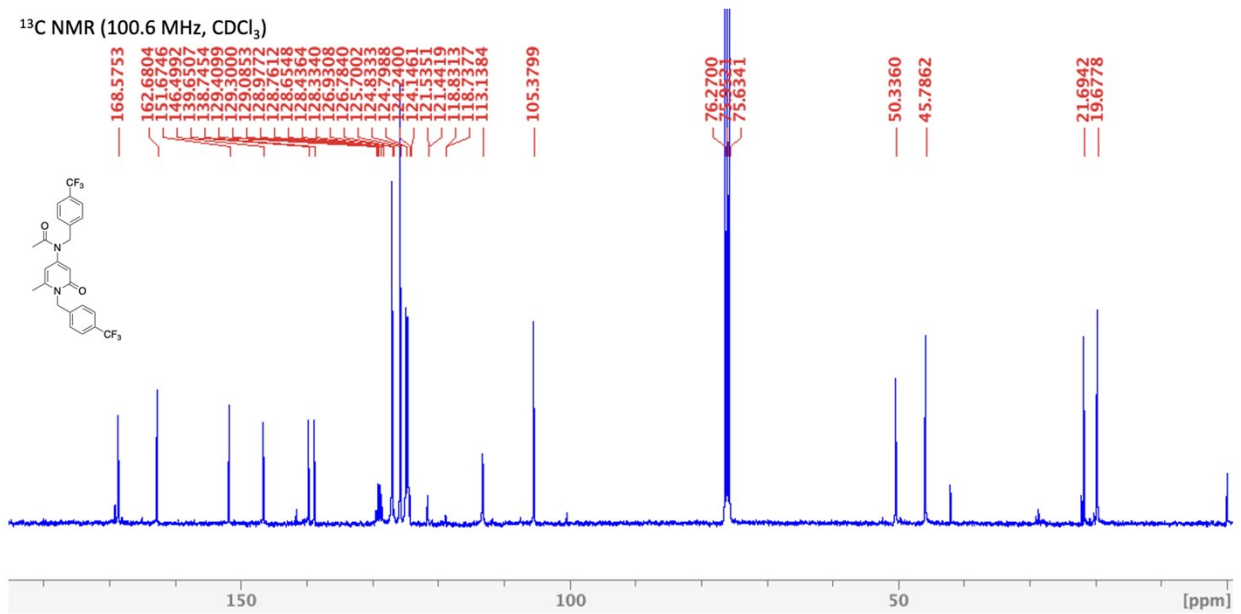

<sup>19</sup>F NMR (564 MHz, CDCl<sub>3</sub>)

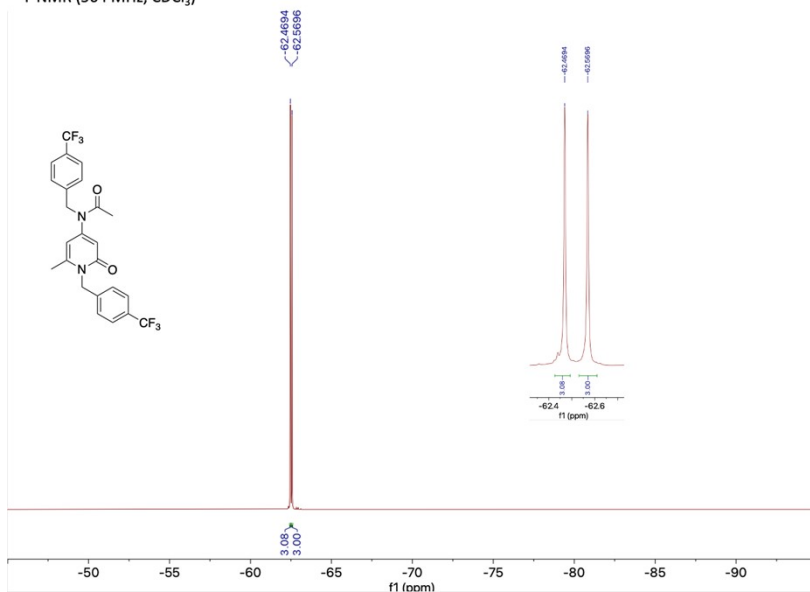

# Compound 19a

<sup>1</sup>H NMR (400 MHz, CDCl<sub>3</sub>)

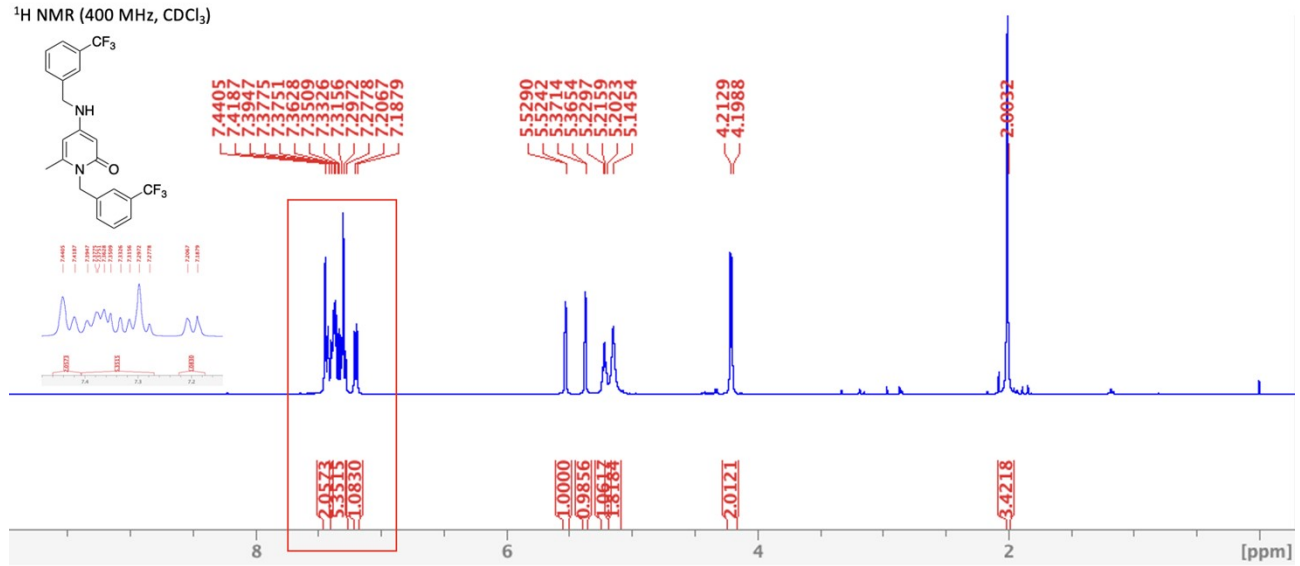

<sup>13</sup>C NMR (100.6 MHz, CDCl<sub>3</sub>)

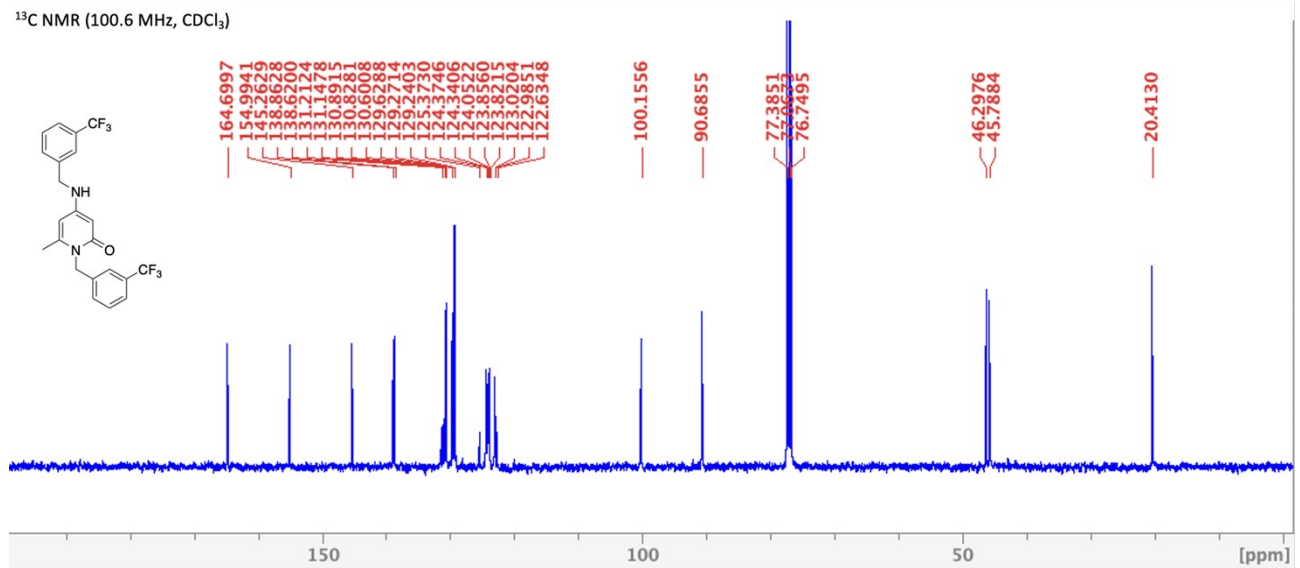

<sup>19</sup>F NMR (564 MHz, CDCl<sub>3</sub>)

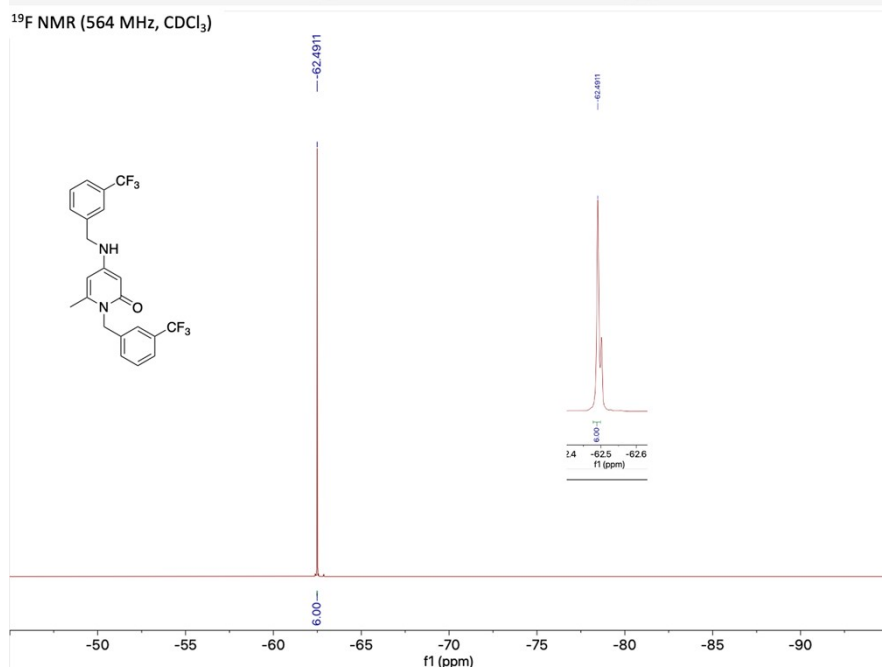

# Compound 19b

<sup>1</sup>H NMR (400 MHz, CDCl<sub>3</sub>)

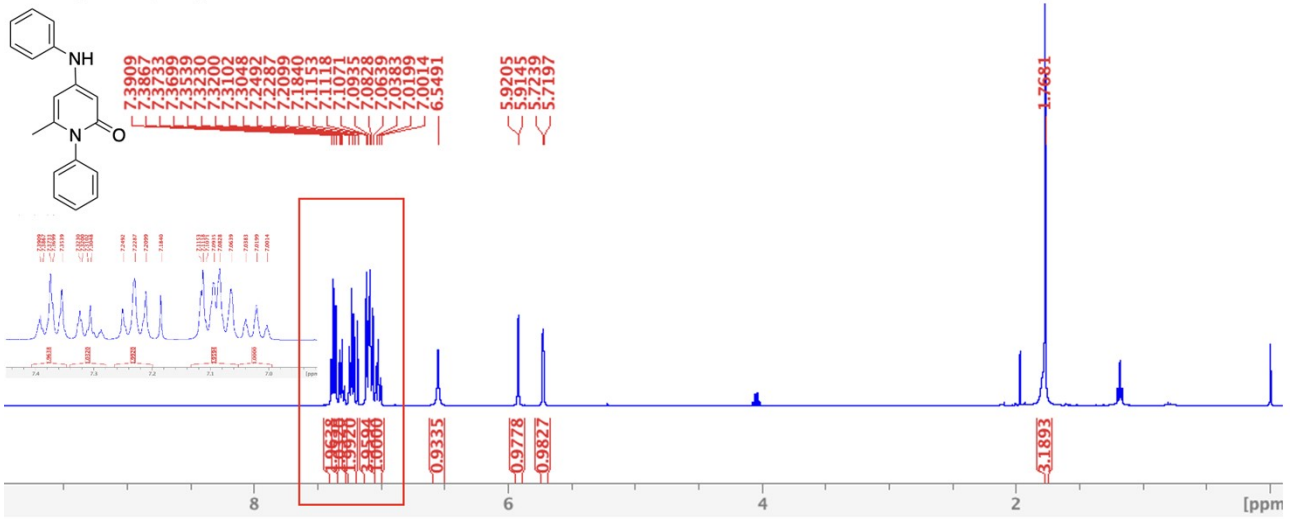

<sup>13</sup>C NMR (100.6 MHz, CDCl<sub>3</sub>)

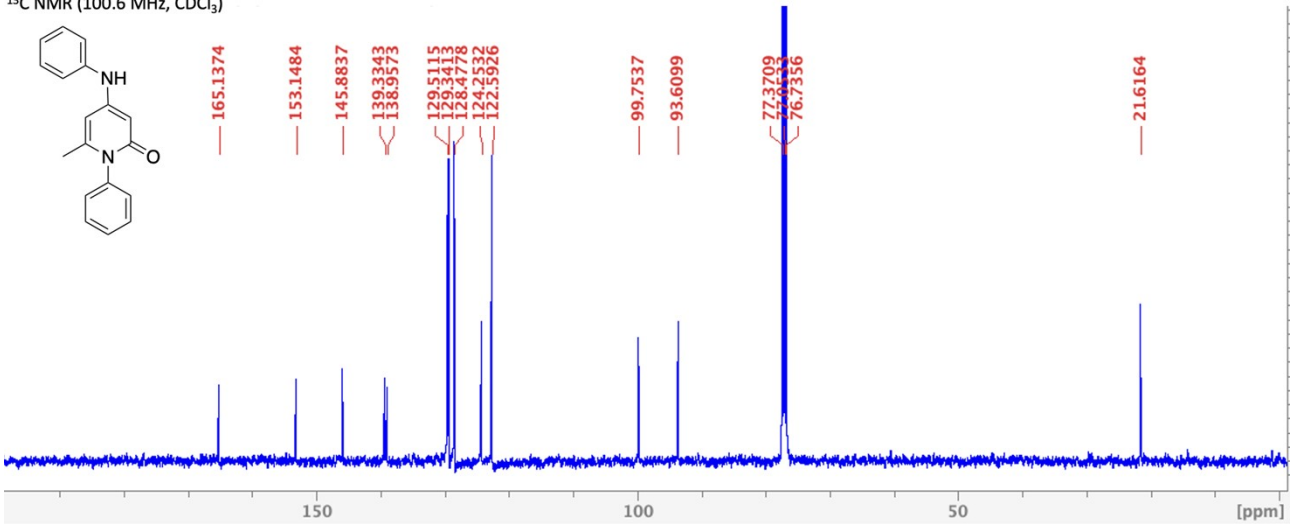



# Compound 19c

<sup>1</sup>H NMR (400 MHz, CDCl<sub>3</sub>)

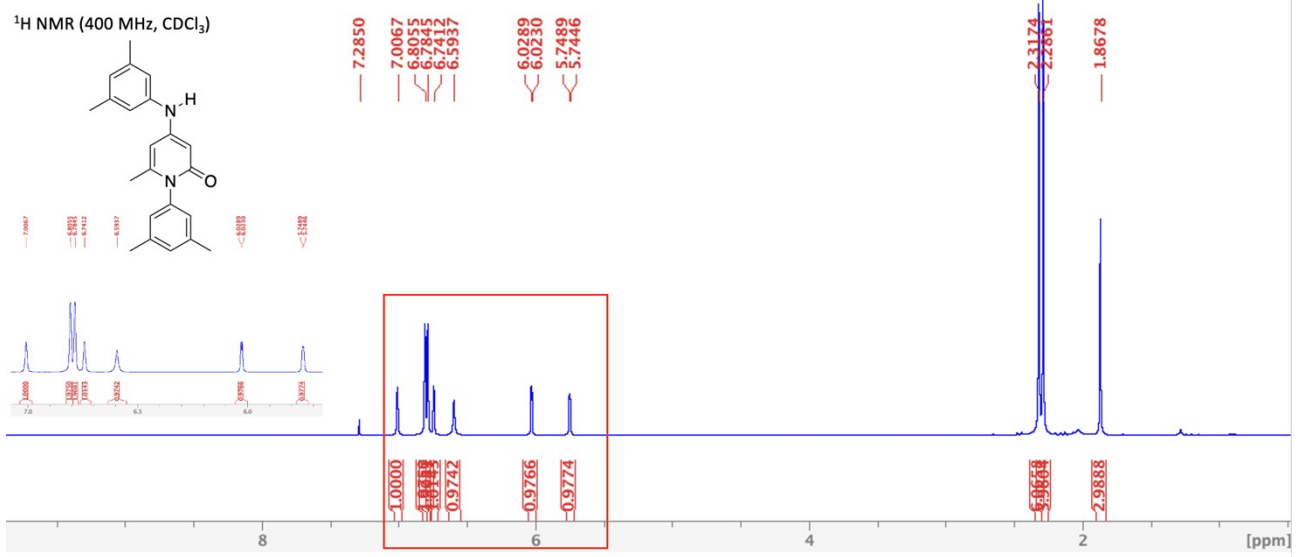

<sup>13</sup>C NMR (100.6 MHz, CDCl<sub>3</sub>)

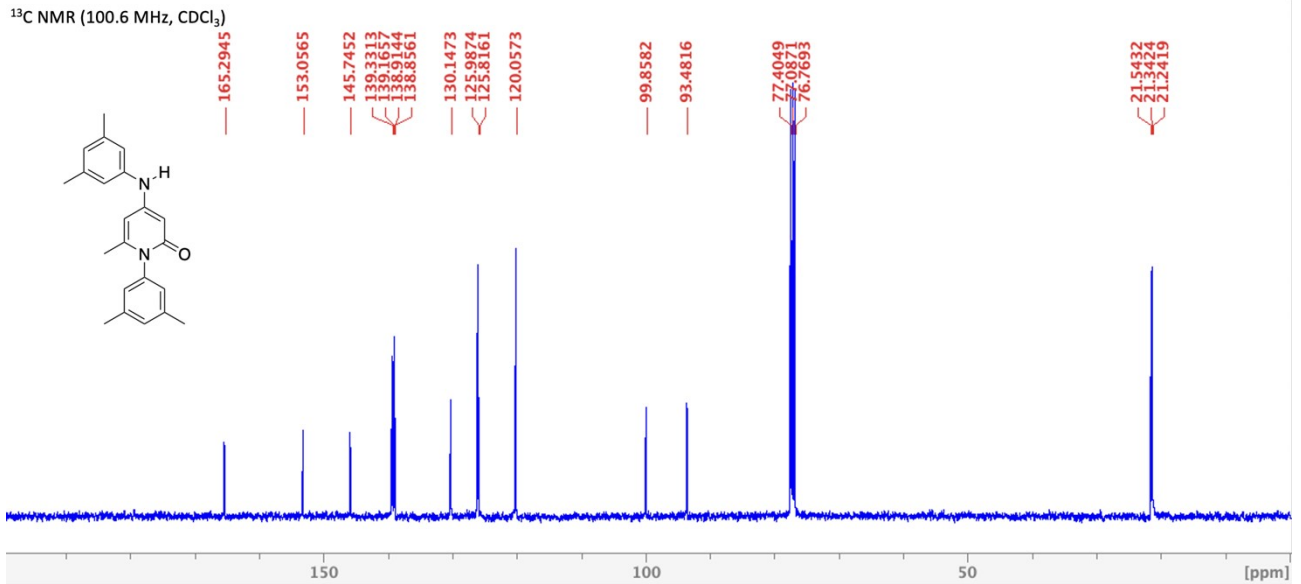

**e-LSF:**  
**Compound 6a**

<sup>1</sup>H NMR (400 MHz, CDCl<sub>3</sub>)

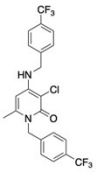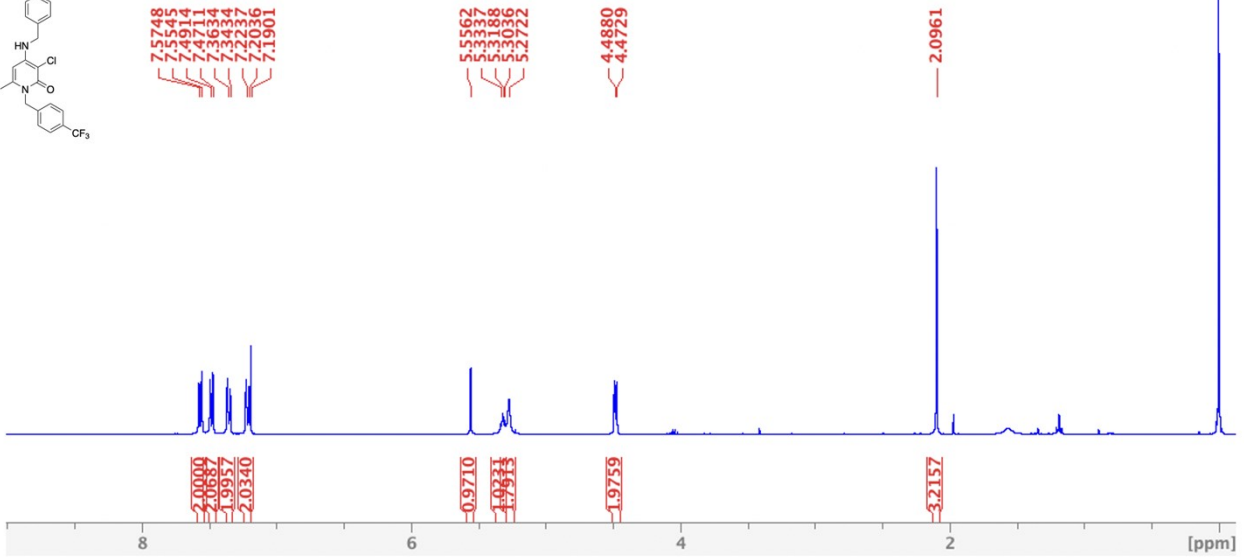

<sup>13</sup>C NMR (100.6 MHz, CDCl<sub>3</sub>)

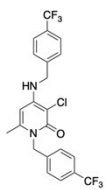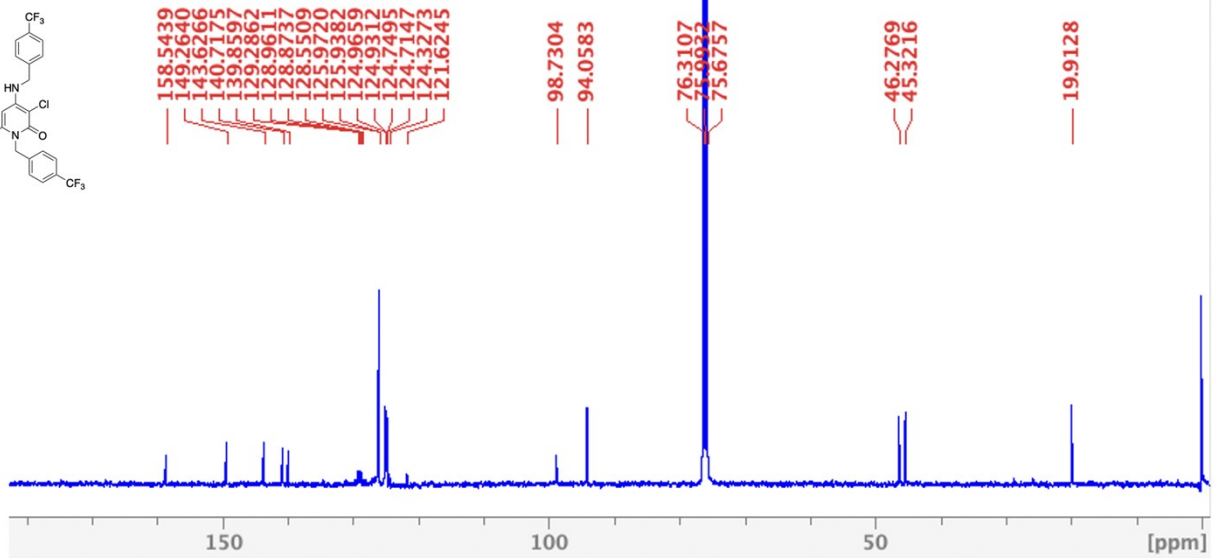

<sup>19</sup>F NMR (564 MHz, CDCl<sub>3</sub>)

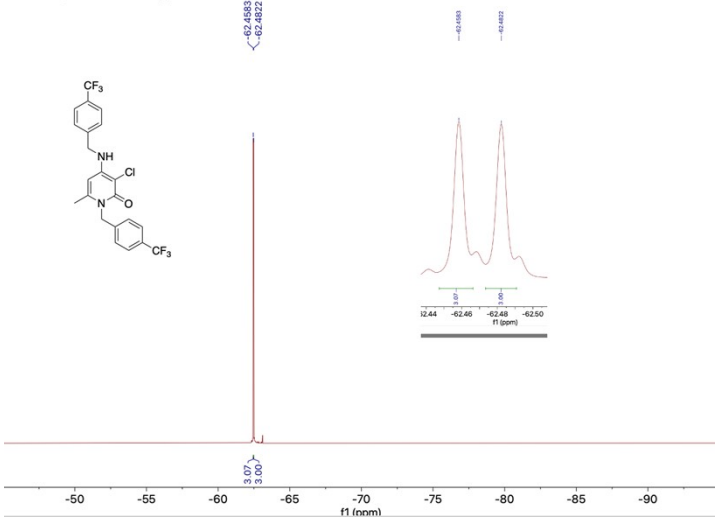

# Compound 6b

<sup>1</sup>H NMR (400 MHz, CDCl<sub>3</sub>)

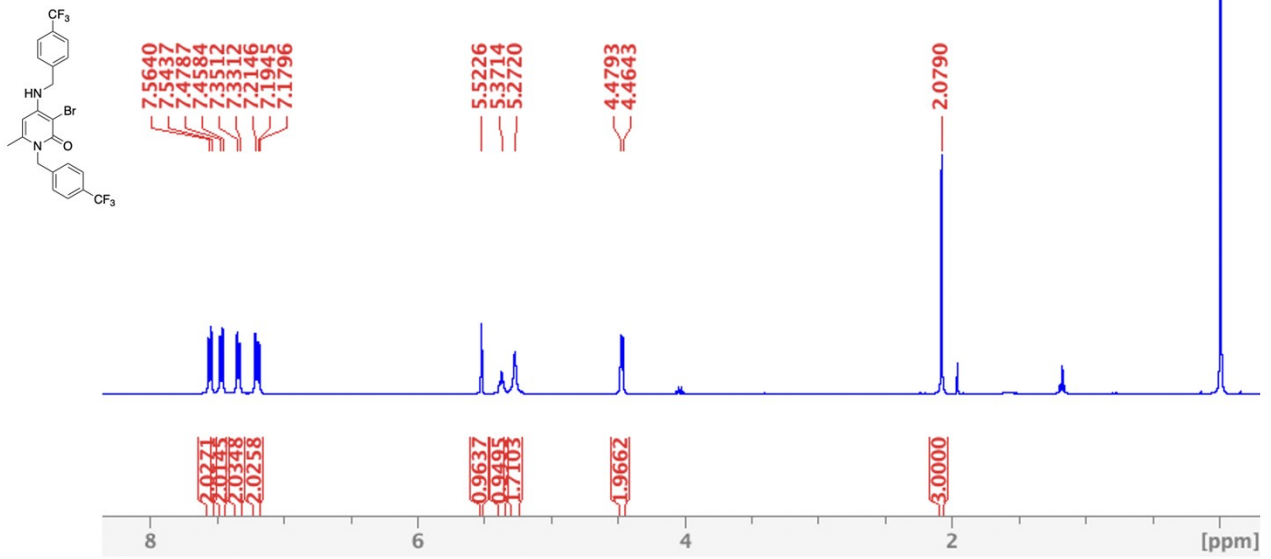

<sup>13</sup>C NMR (100.6 MHz, CDCl<sub>3</sub>)

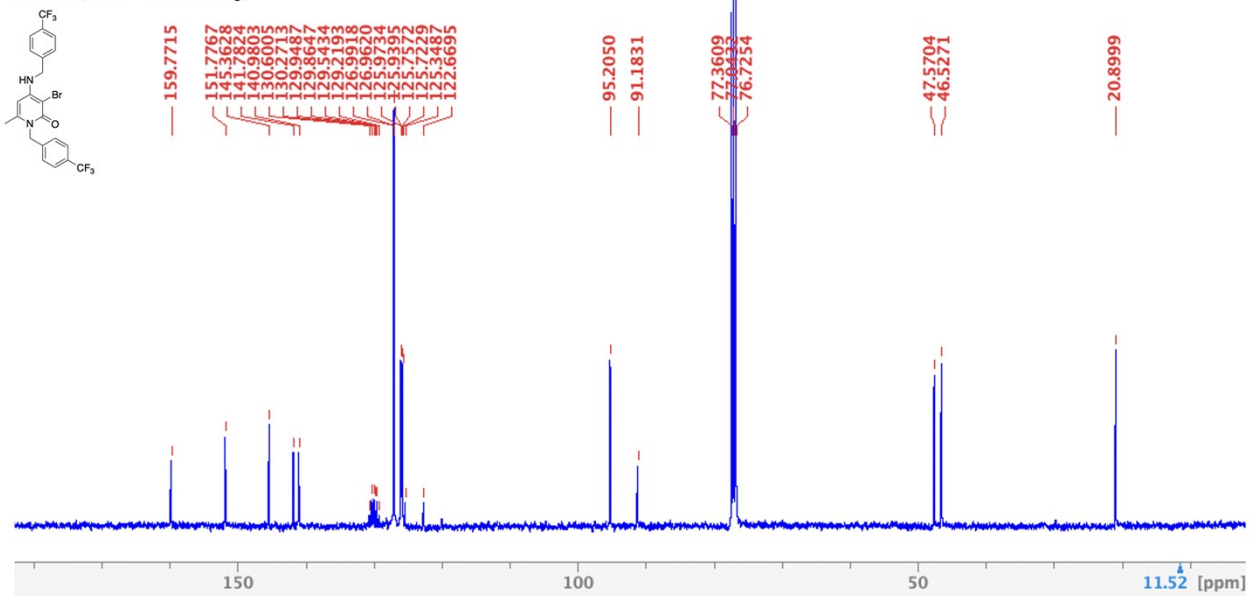

<sup>19</sup>F NMR (564 MHz, CDCl<sub>3</sub>)

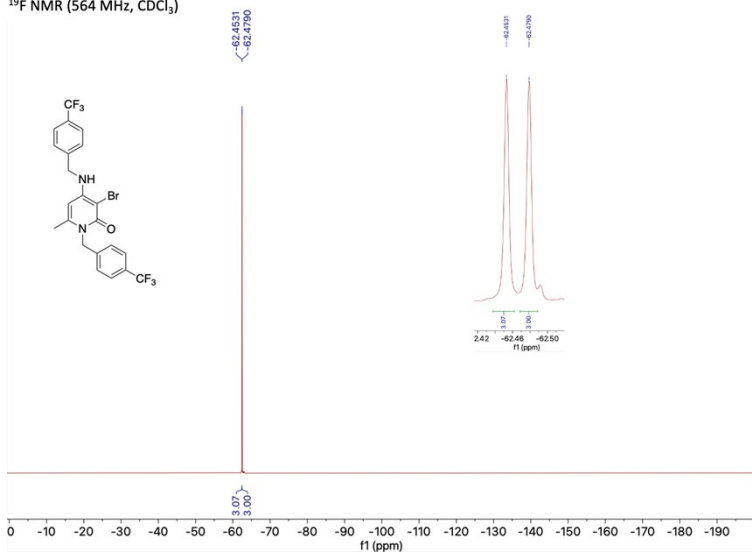

# Compound 6c

<sup>1</sup>H NMR (400 MHz, CDCl<sub>3</sub>)

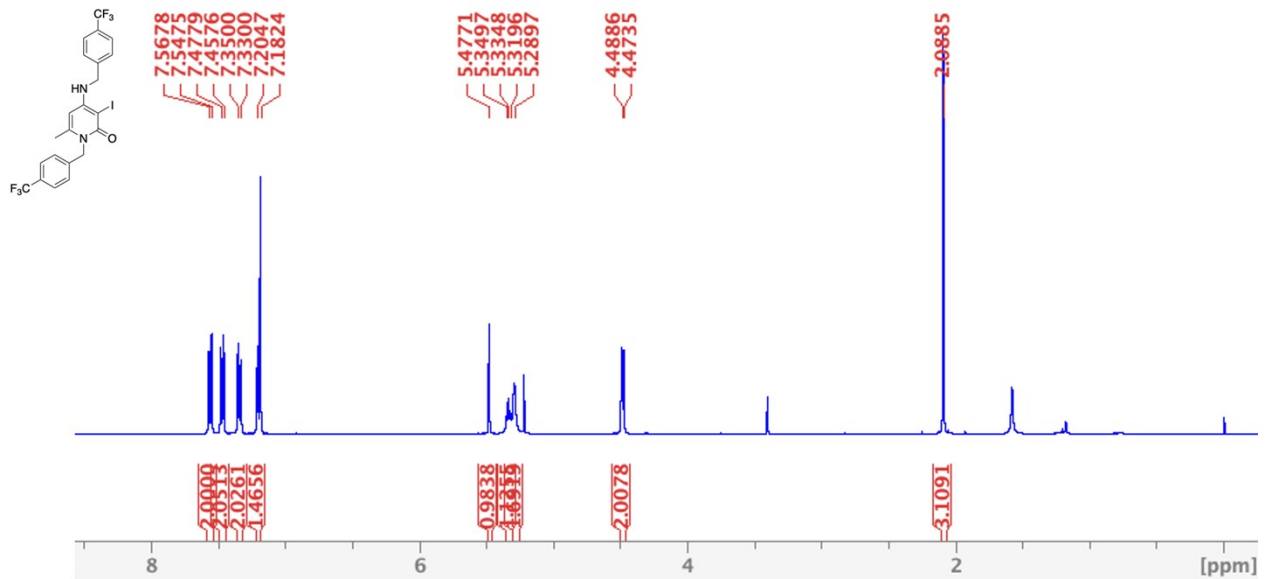

<sup>13</sup>C NMR (100.6 MHz, CDCl<sub>3</sub>)

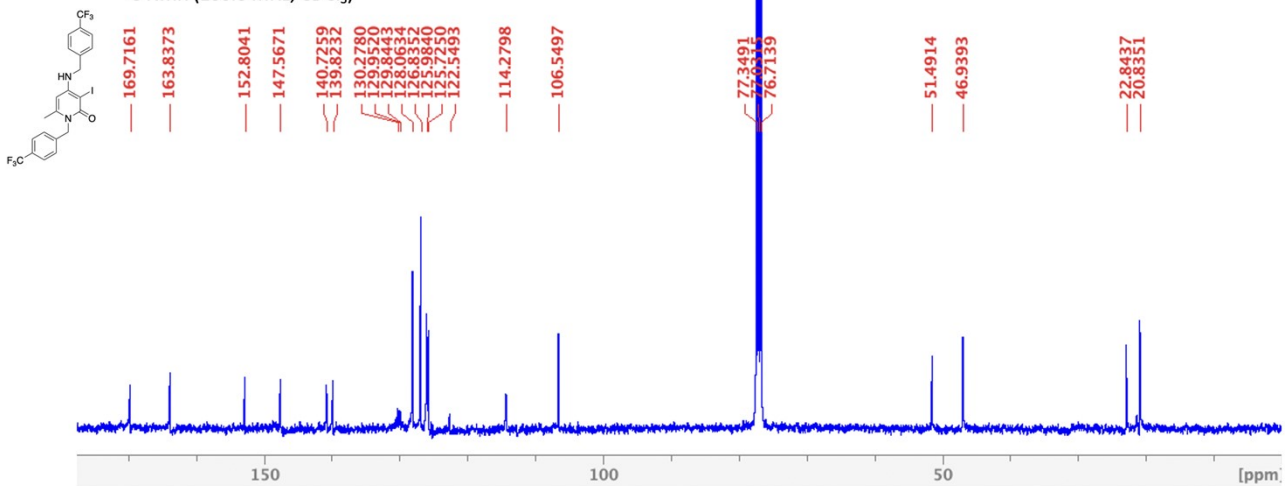

<sup>19</sup>F NMR (564 MHz, CDCl<sub>3</sub>)

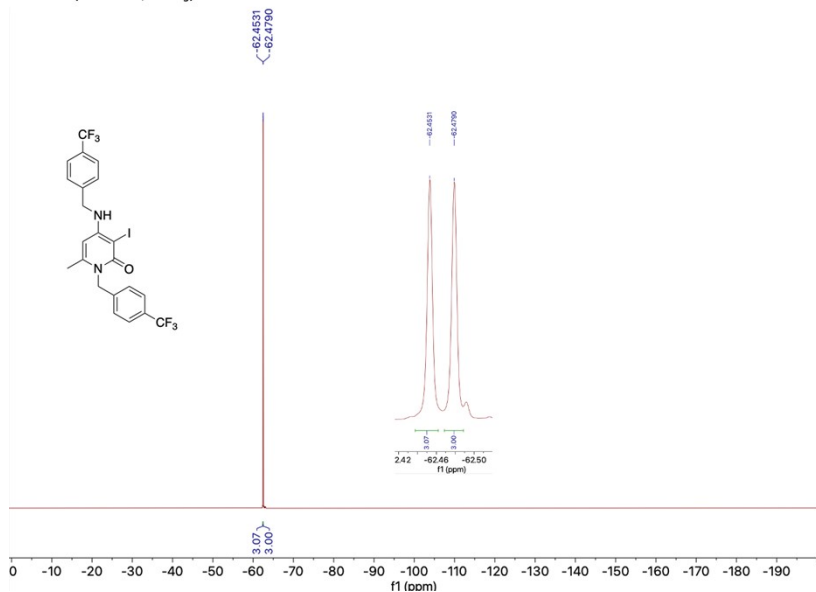

# Compound 13

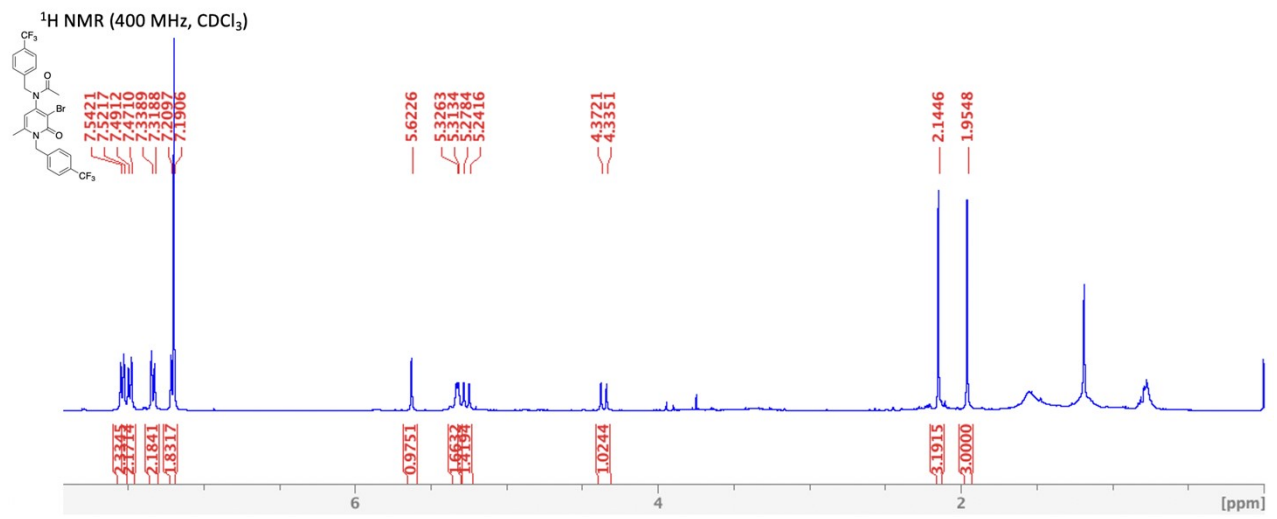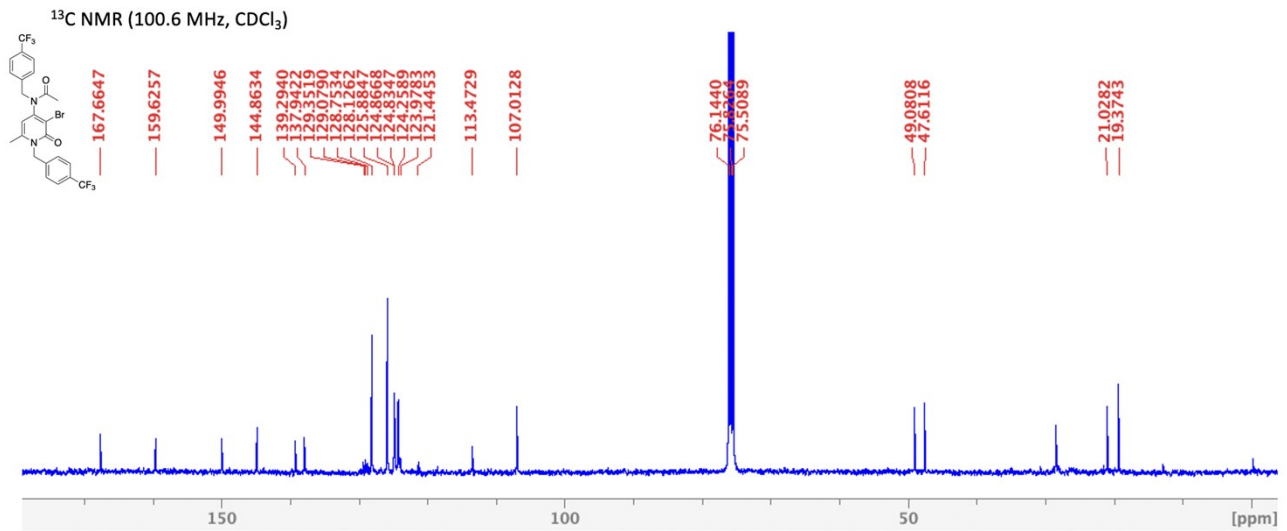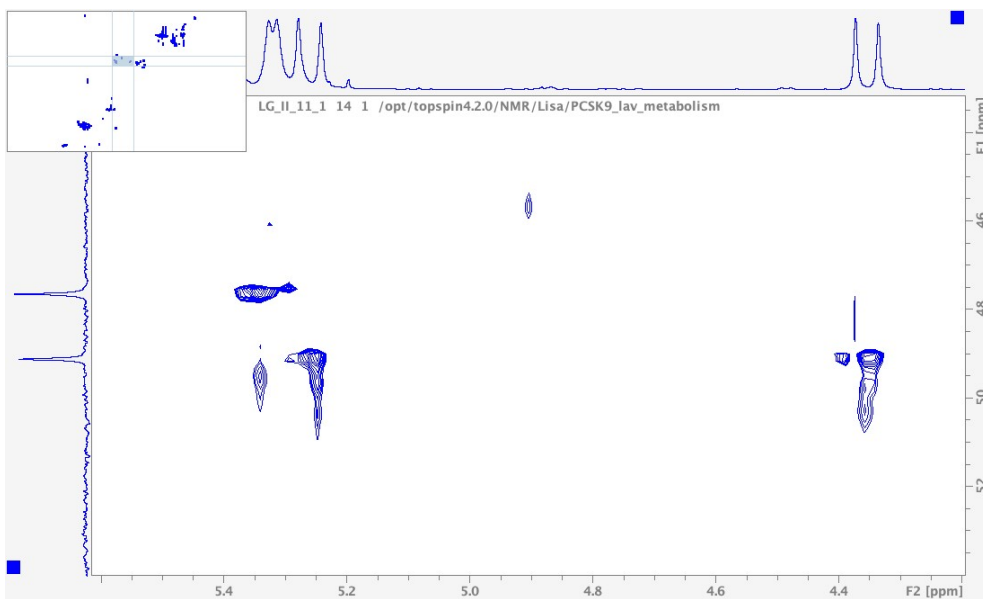

<sup>19</sup>F NMR (564 MHz, CDCl<sub>3</sub>)

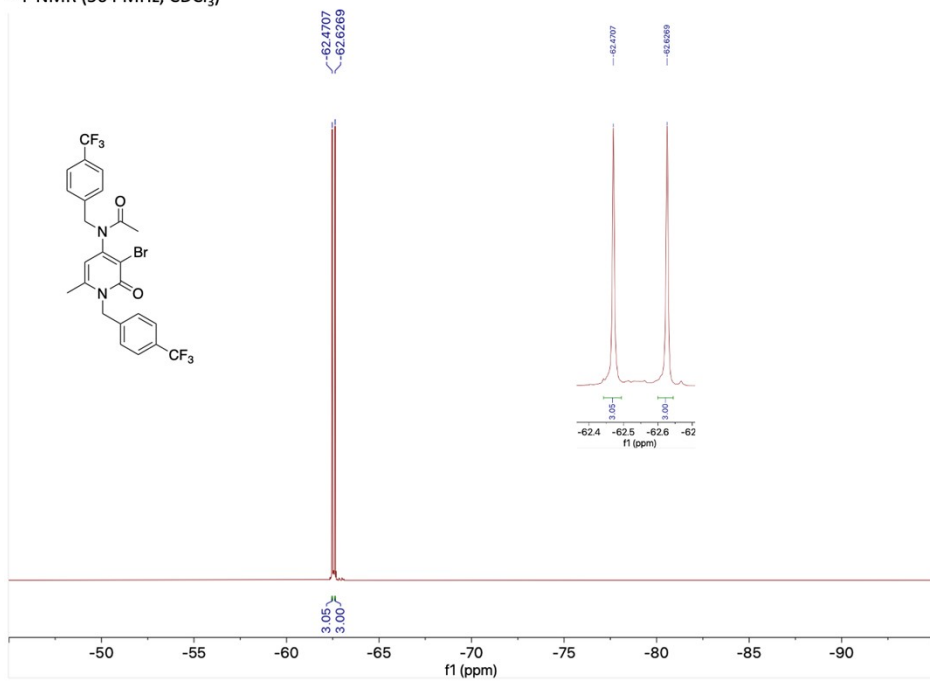

# Compound 20a

<sup>1</sup>H NMR (400 MHz, CDCl<sub>3</sub>)

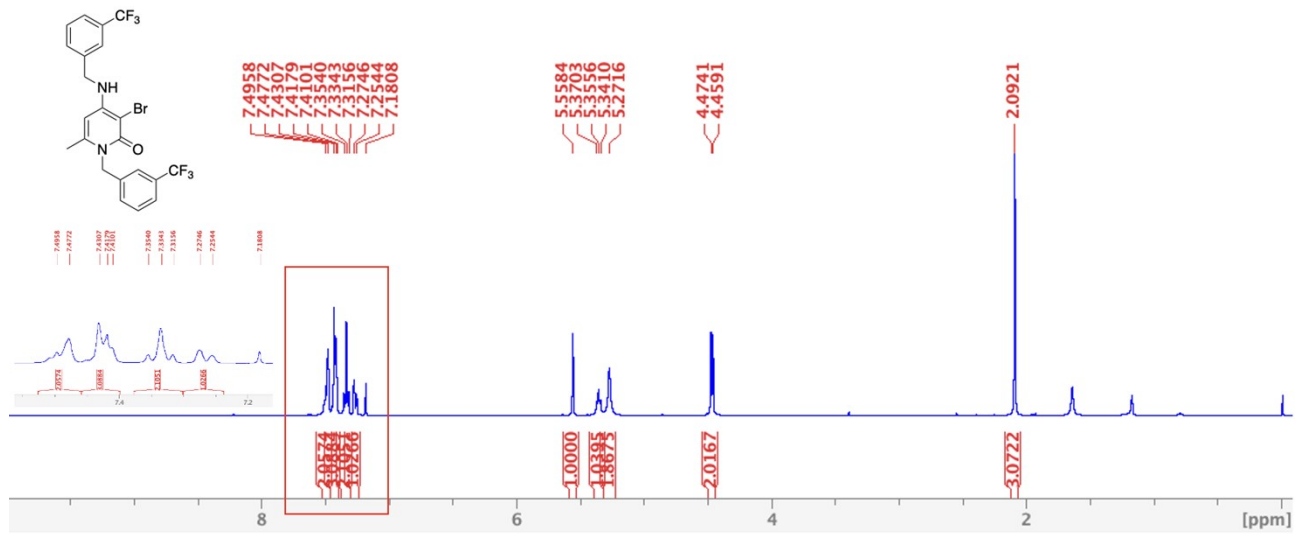

<sup>13</sup>C NMR (100.6 MHz, CDCl<sub>3</sub>)

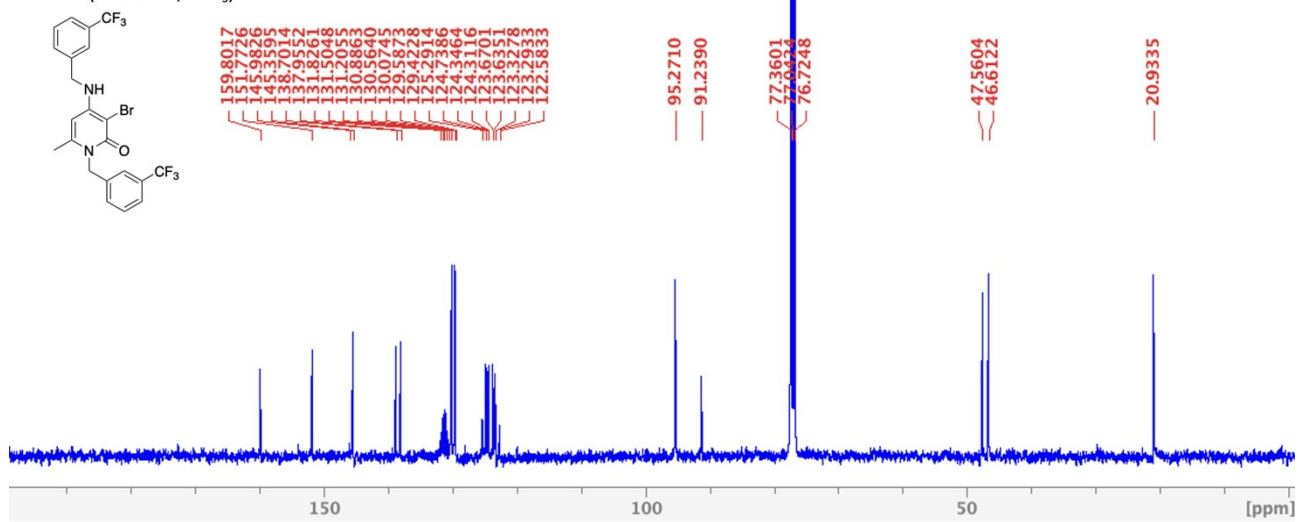

<sup>19</sup>F NMR (564 MHz, CDCl<sub>3</sub>)

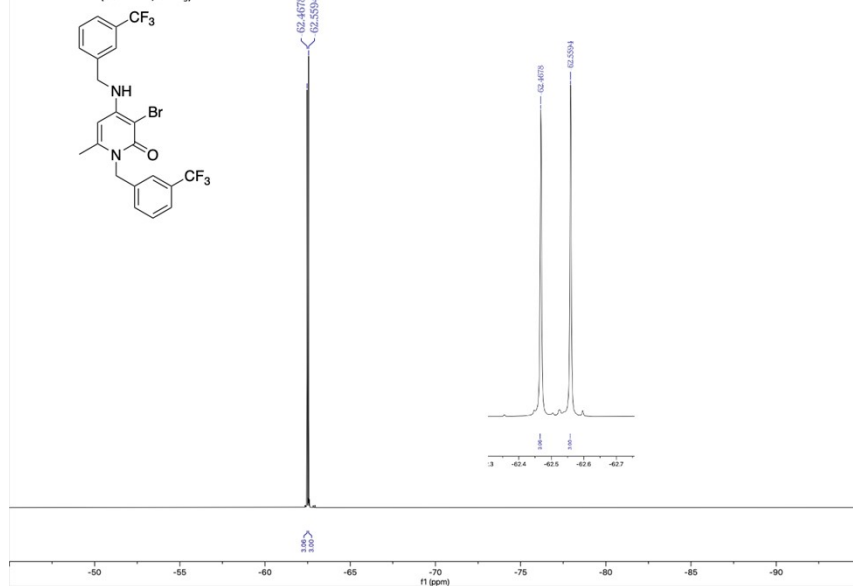

# Compound 20b

<sup>1</sup>H NMR (400 MHz, CDCl<sub>3</sub>)

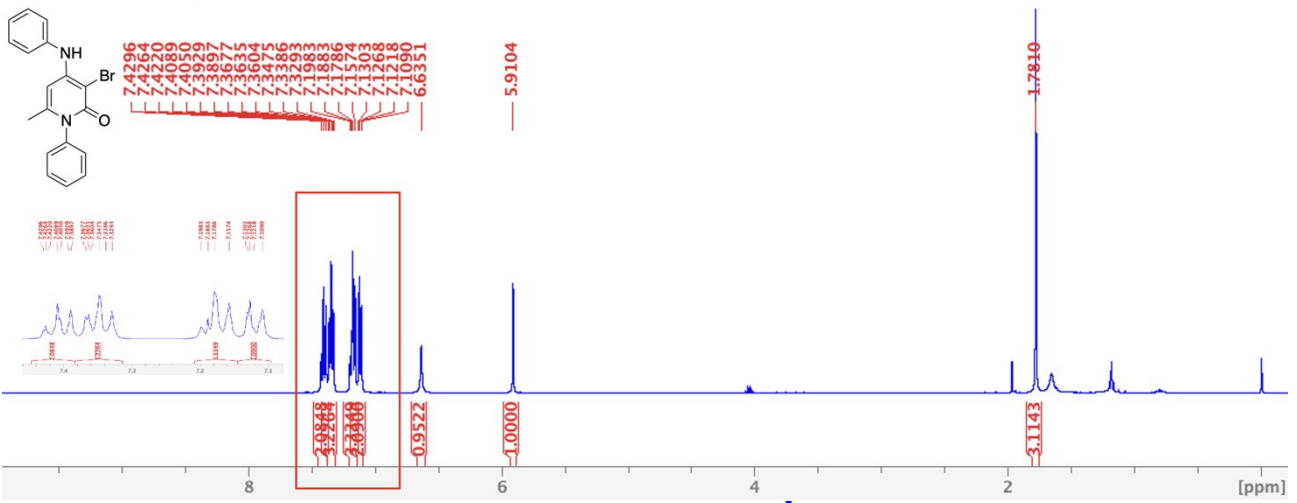

<sup>13</sup>C NMR (100.6 MHz, CDCl<sub>3</sub>)

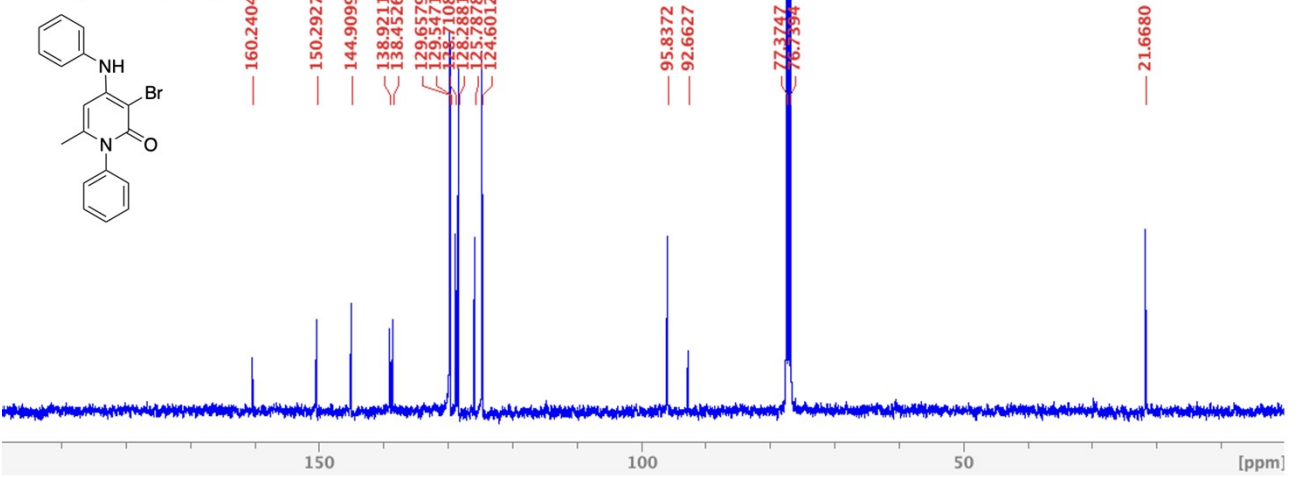



# Compound 20c

<sup>1</sup>H NMR (400 MHz, CDCl<sub>3</sub>)

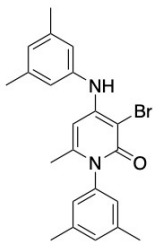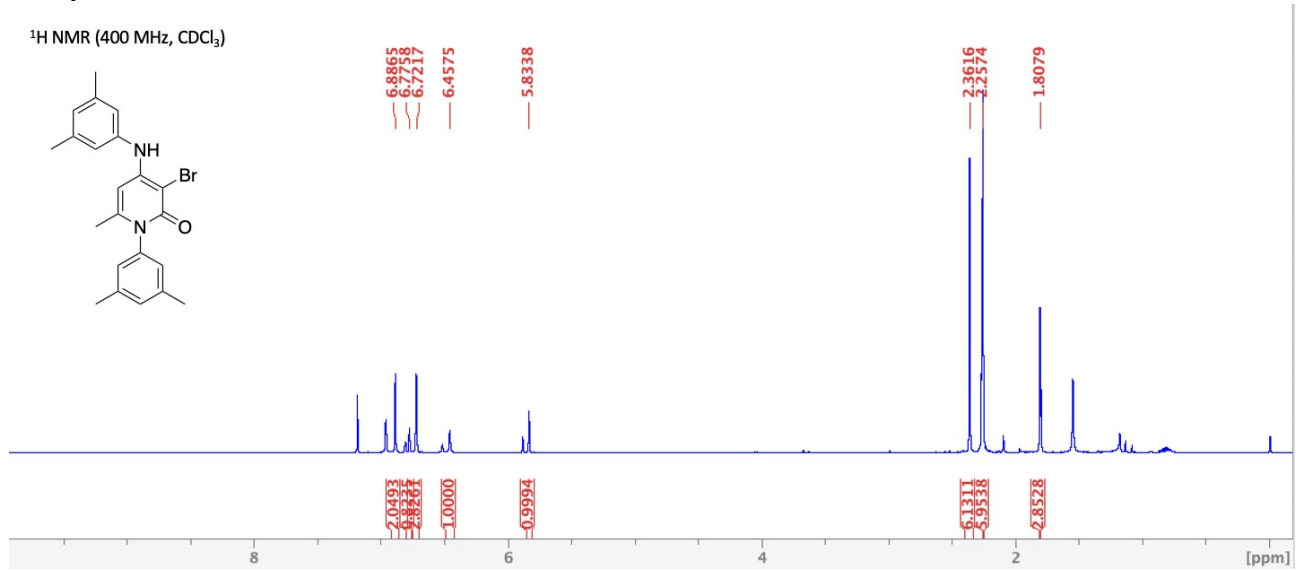

<sup>13</sup>C NMR (100.6 MHz, CDCl<sub>3</sub>)

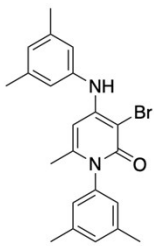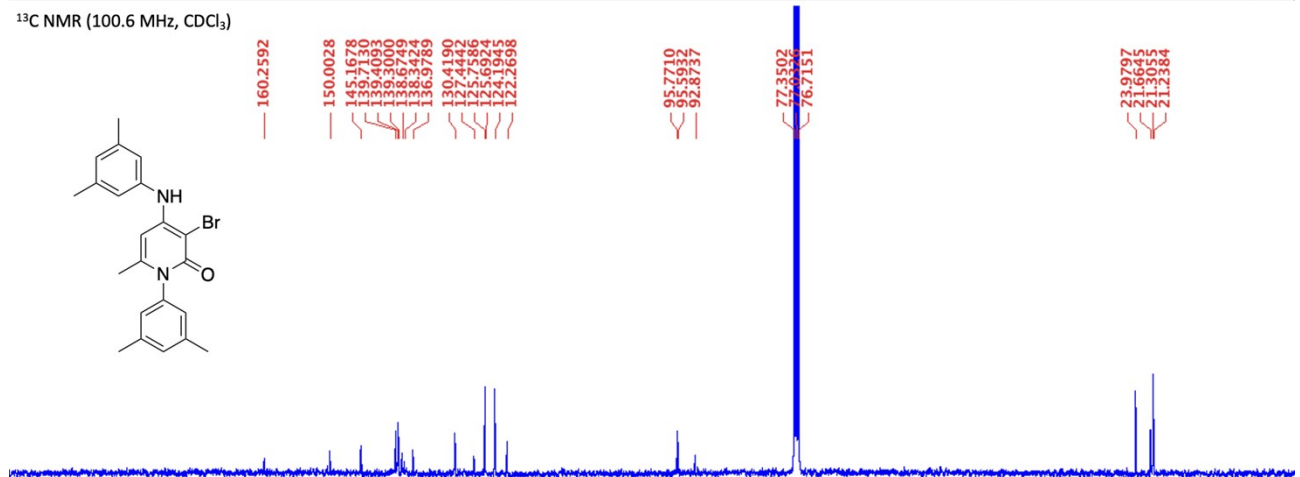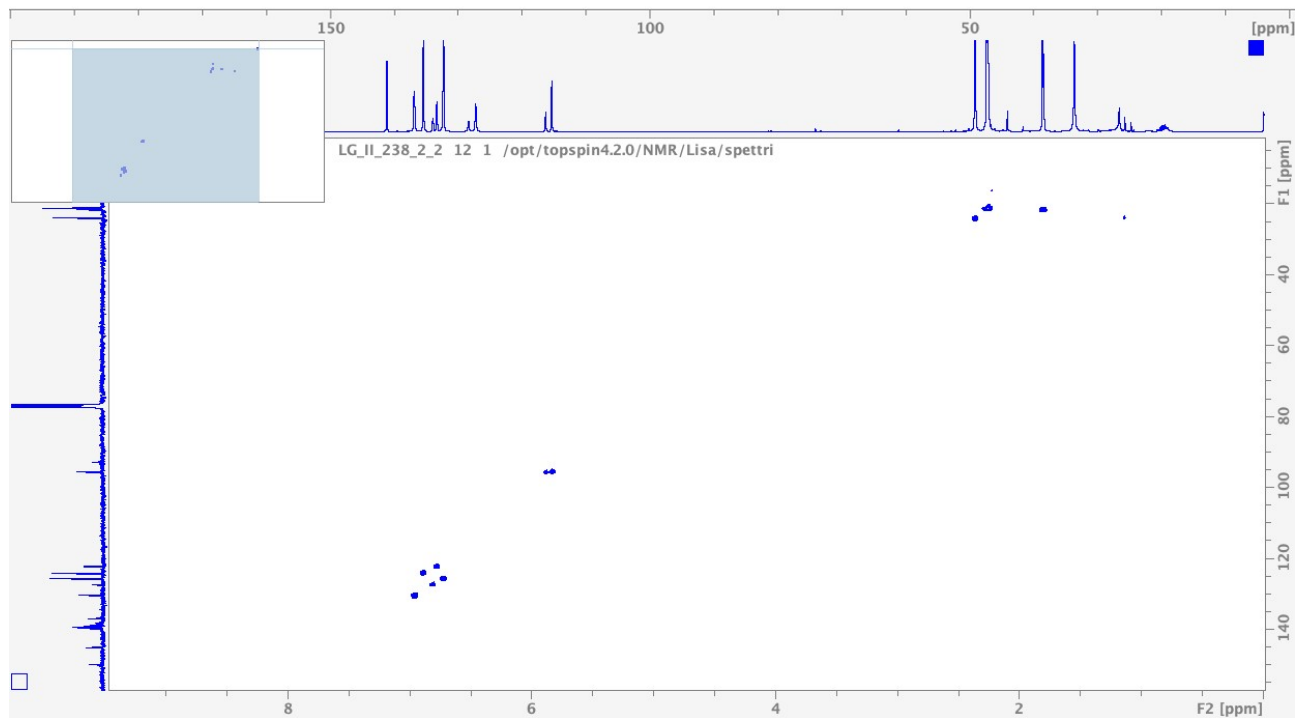

# Compound 7

<sup>1</sup>H NMR (400 MHz, CDCl<sub>3</sub>)

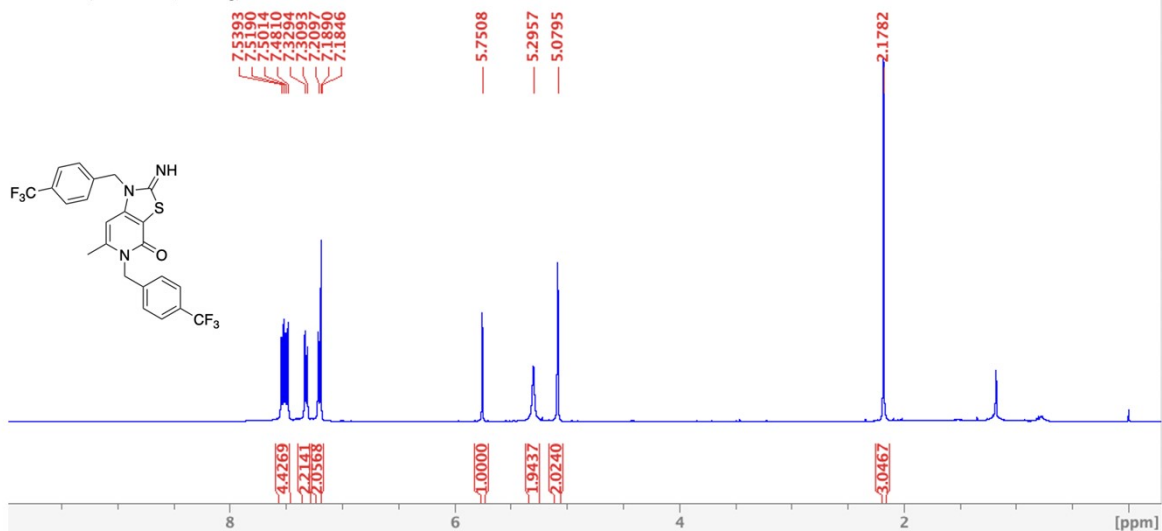

<sup>1</sup>H NMR (400 MHz, DMSO-d<sub>6</sub>)

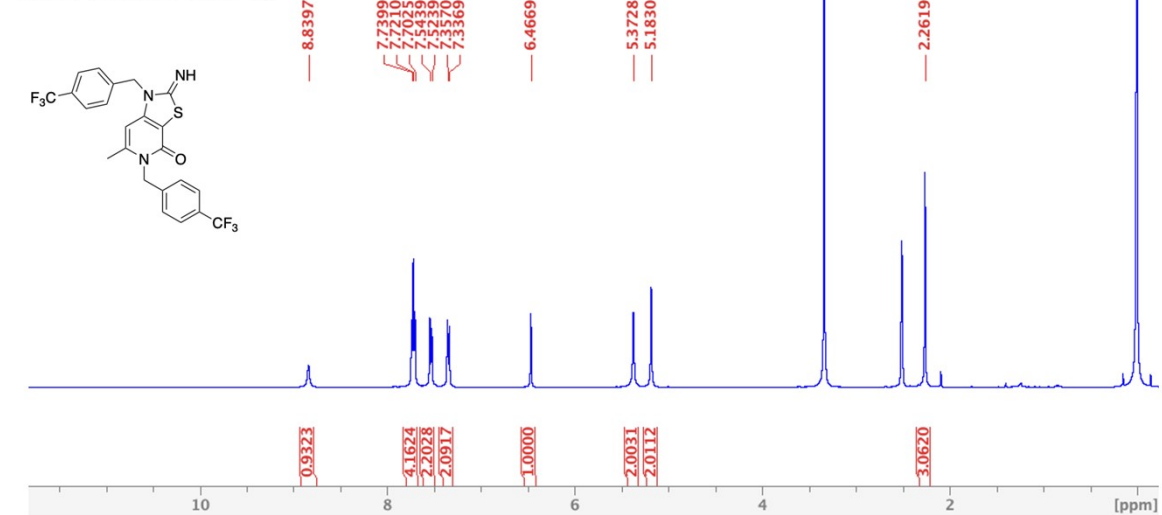

<sup>13</sup>C NMR (100.6 MHz, CDCl<sub>3</sub>)

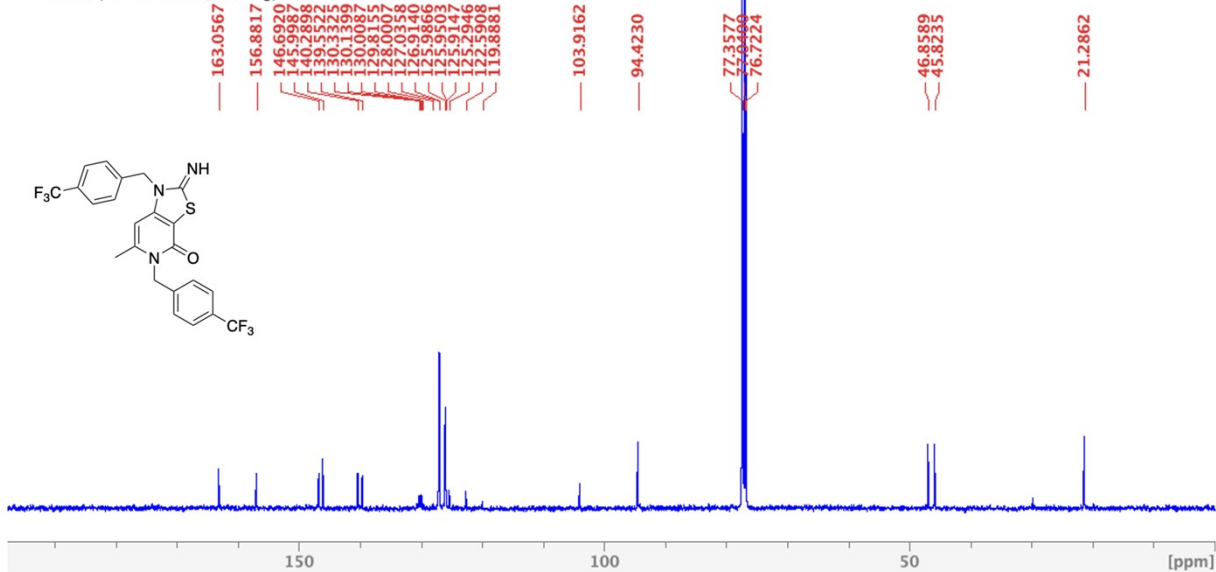

<sup>19</sup>F NMR (564 MHz, CDCl<sub>3</sub>)

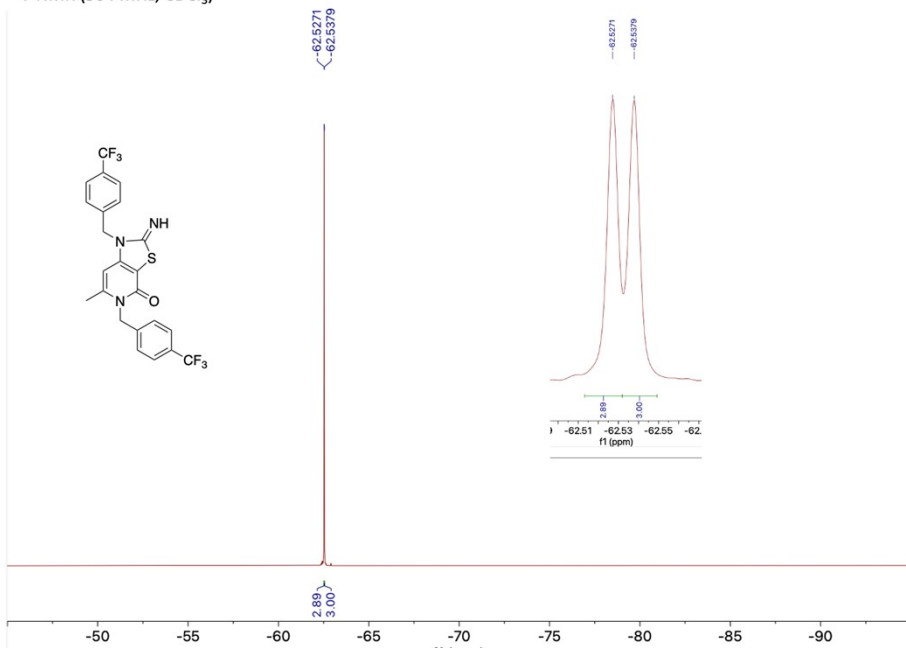

# Compound 21a

<sup>1</sup>H NMR (400 MHz, CDCl<sub>3</sub>)

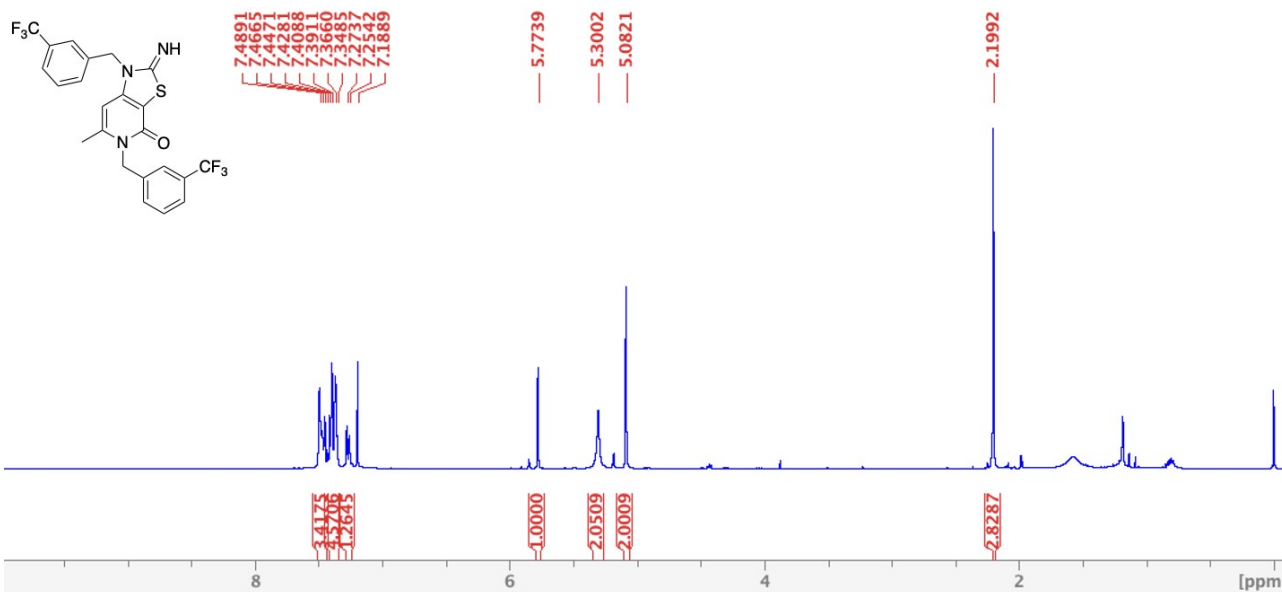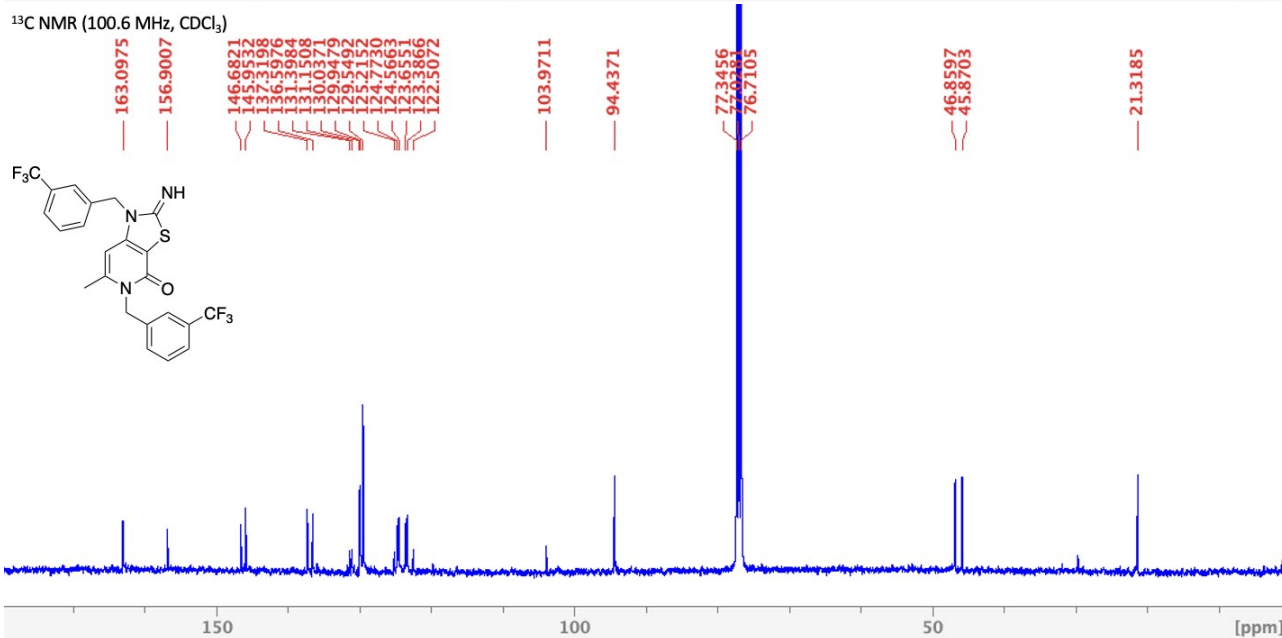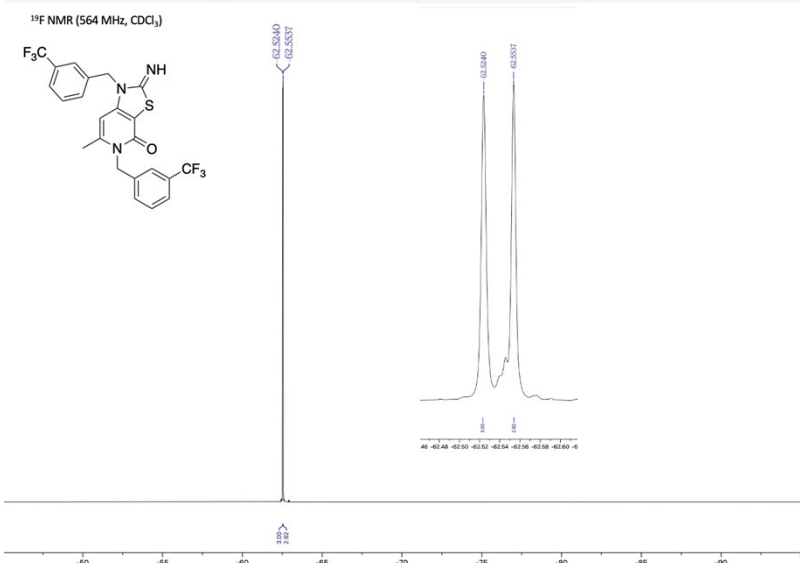

# Compound 21b

<sup>1</sup>H NMR (400 MHz, CDCl<sub>3</sub>)

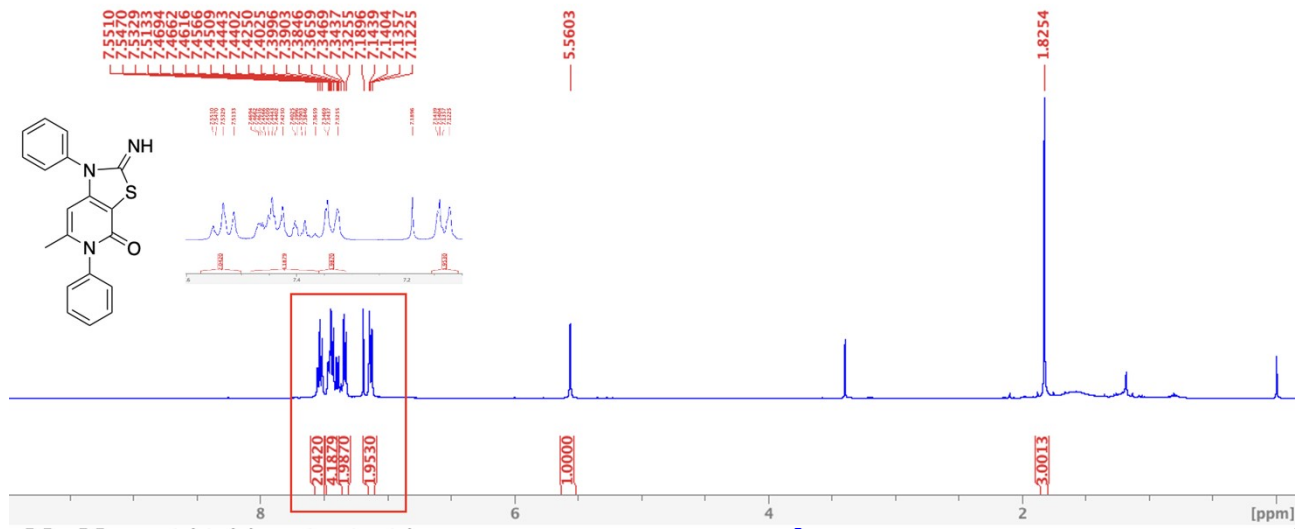

# Compound 21c

<sup>1</sup>H NMR (400 MHz, CDCl<sub>3</sub>)

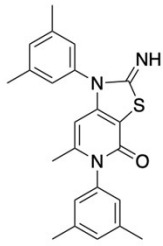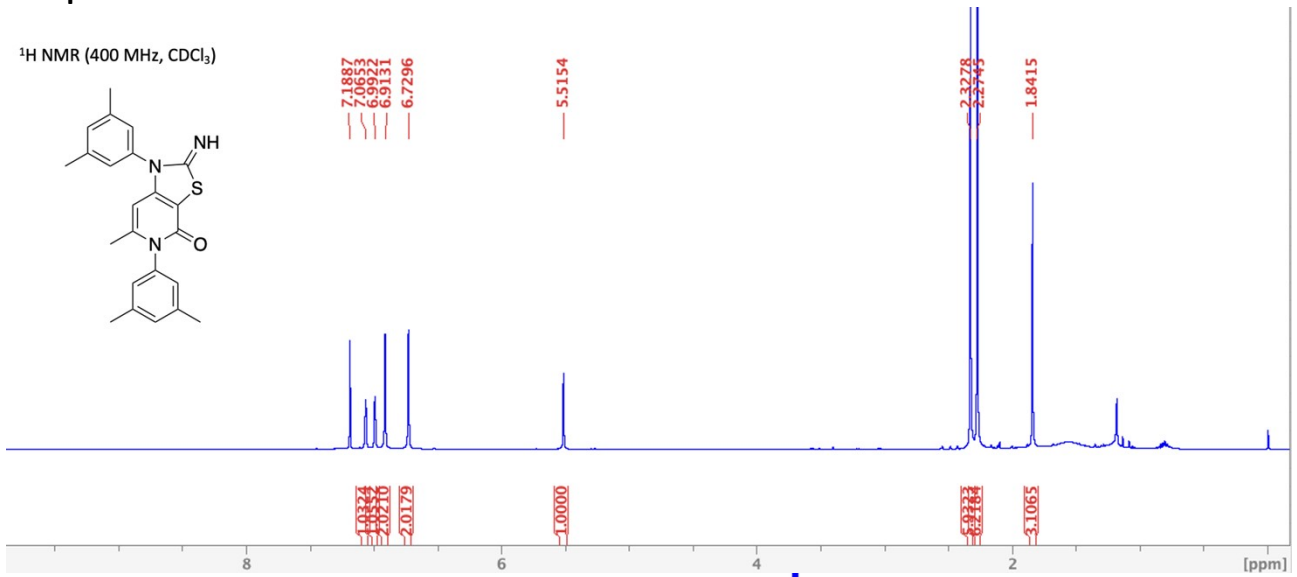

<sup>13</sup>C NMR (100.6 MHz, CDCl<sub>3</sub>)

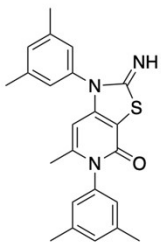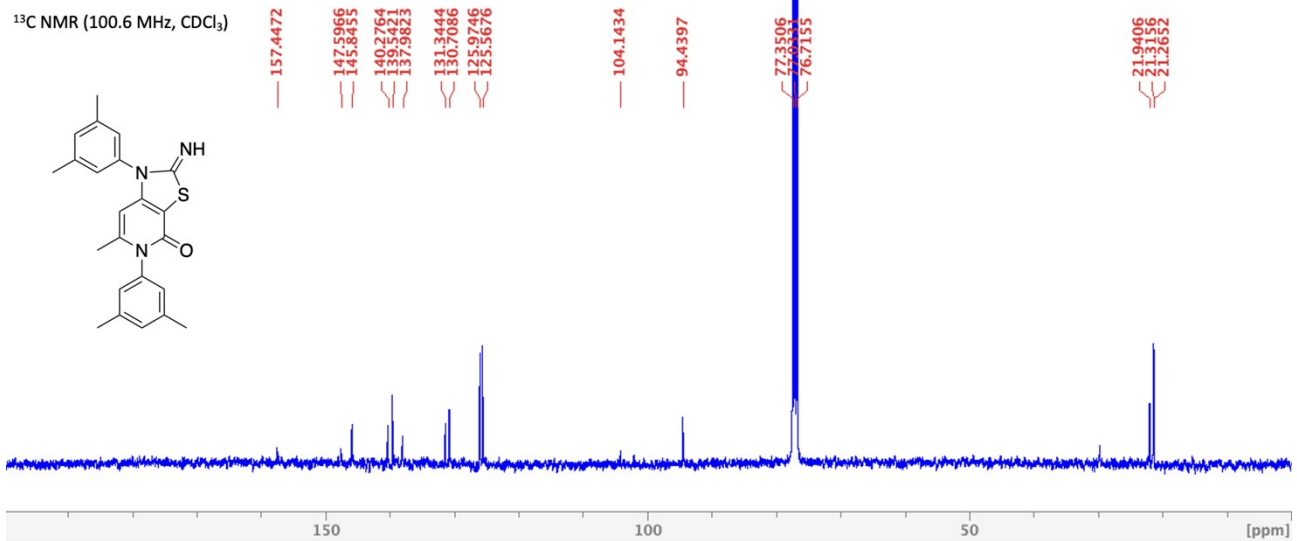

# Compound 17

<sup>1</sup>H NMR (400 MHz, CDCl<sub>3</sub>)

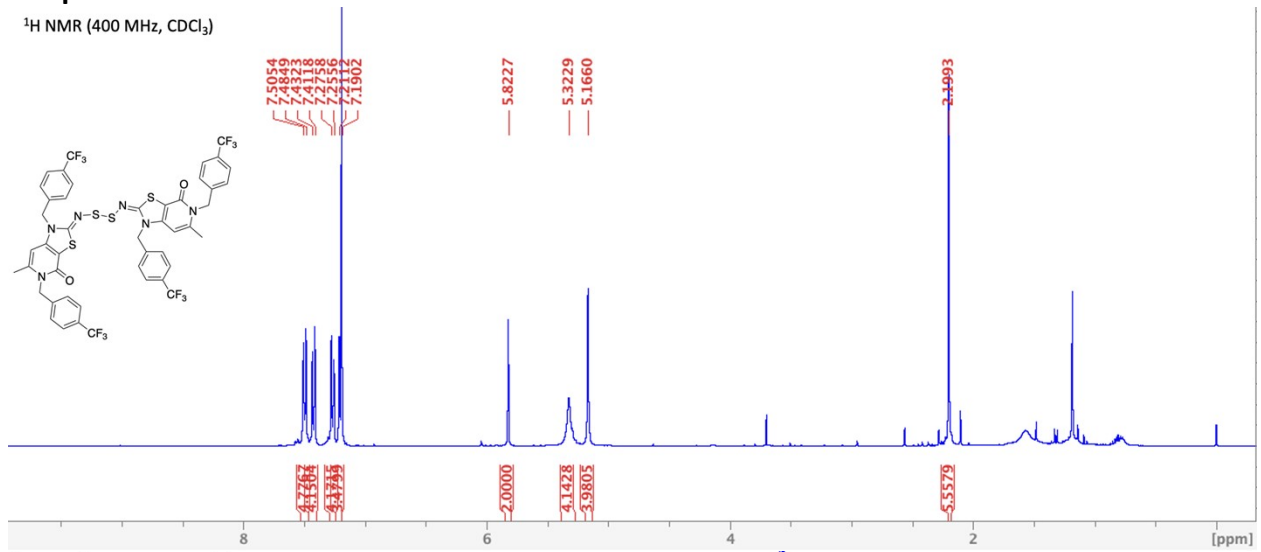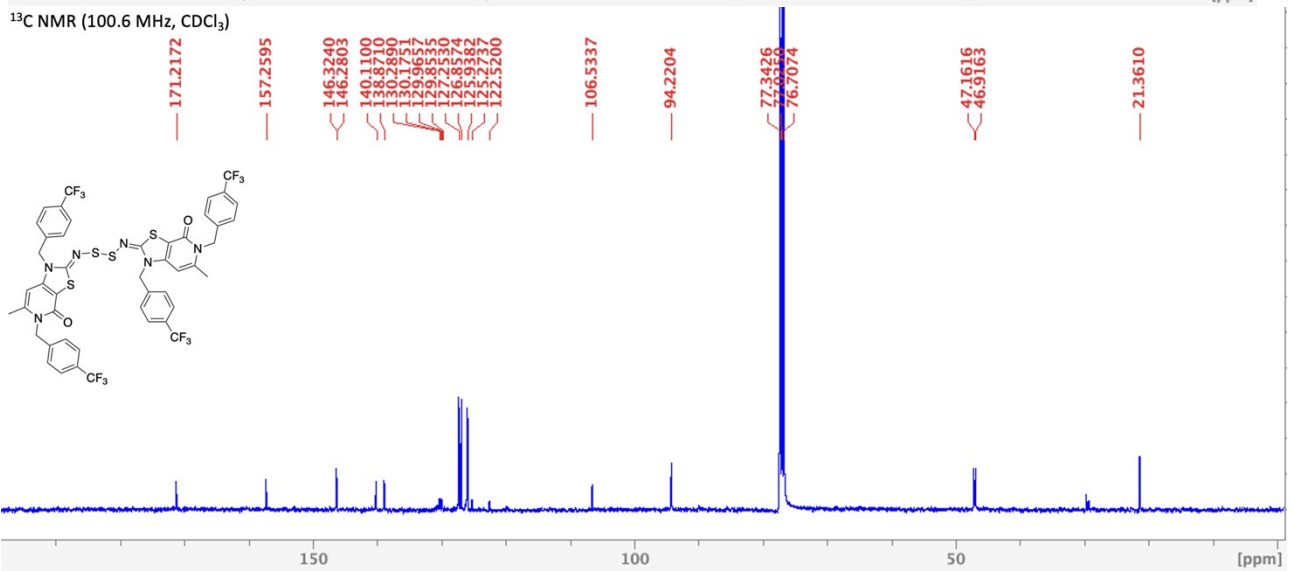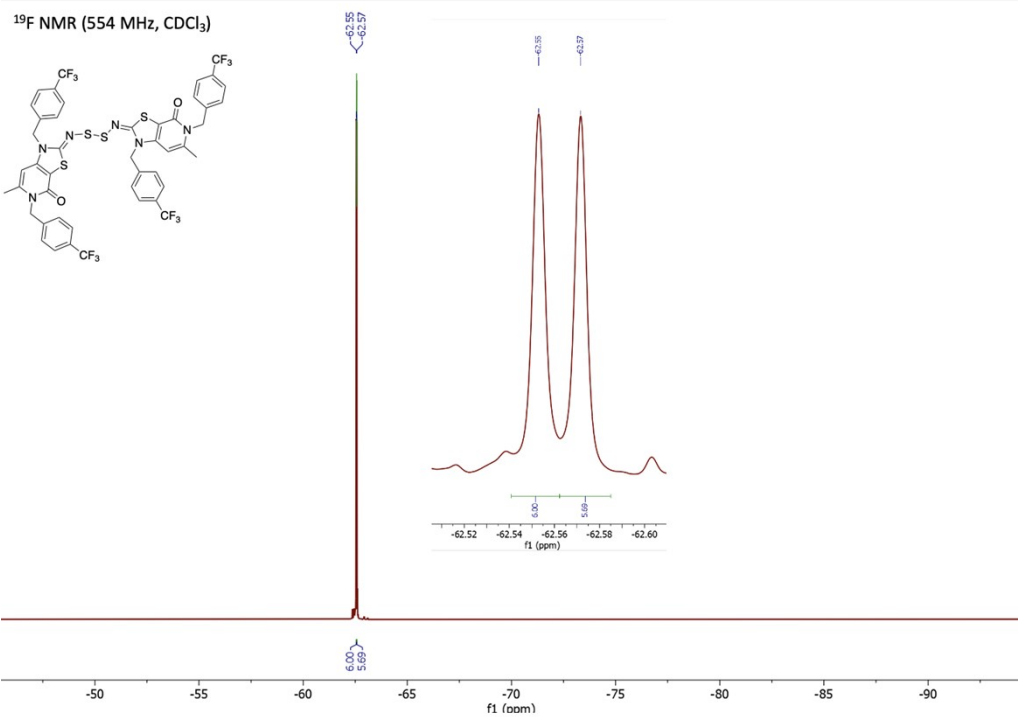





# Compound 22a

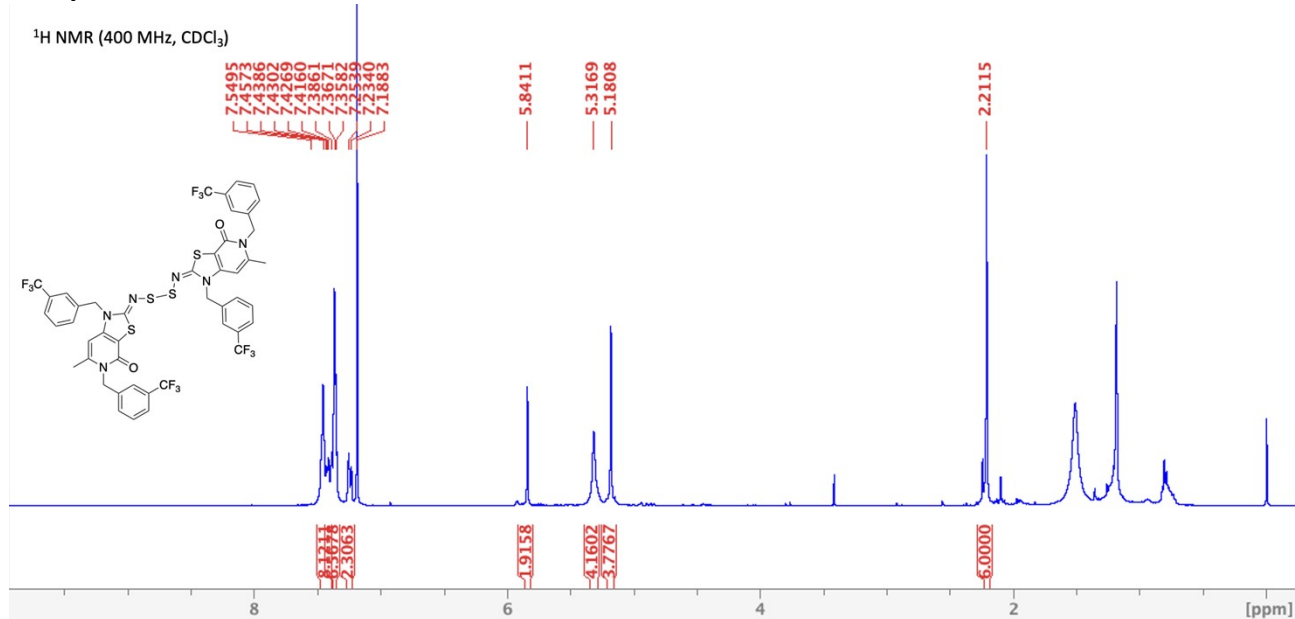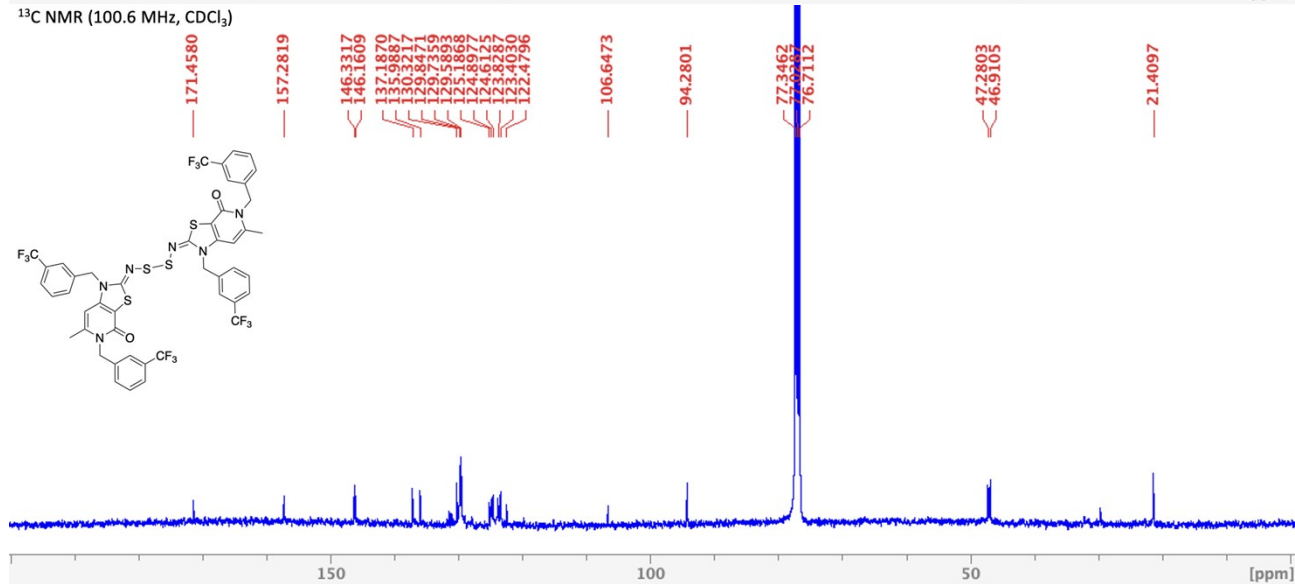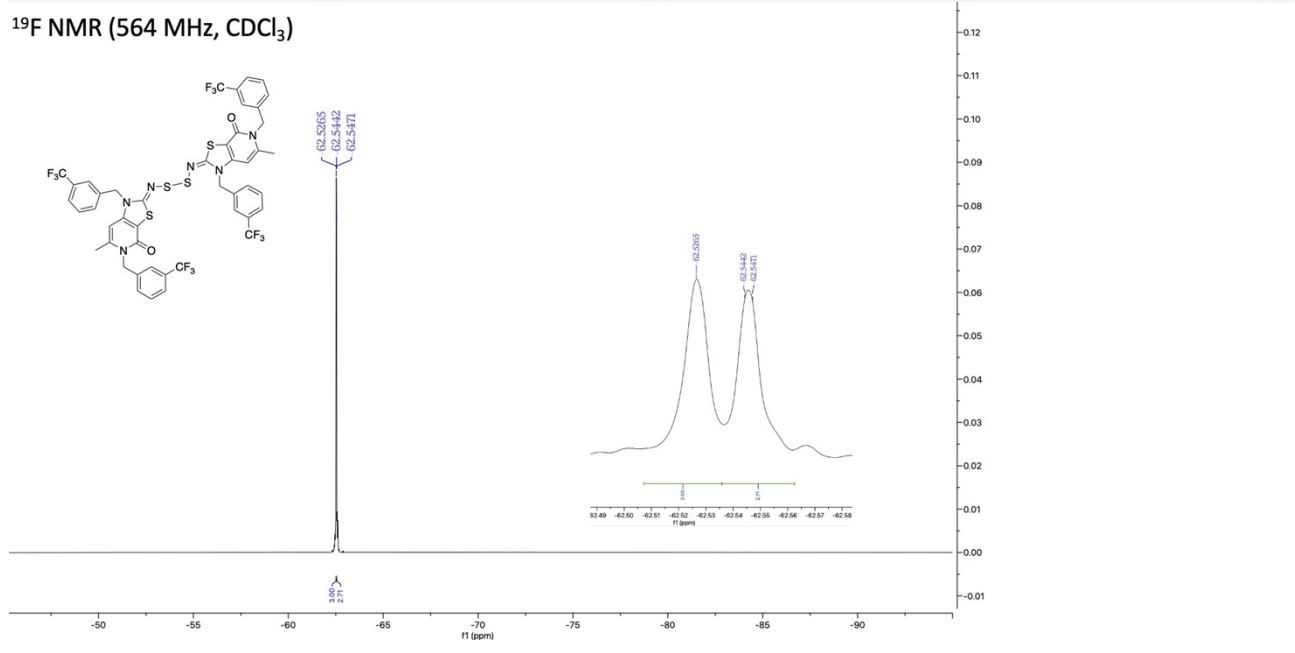

# Compound 22b

<sup>1</sup>H NMR (400 MHz, CDCl<sub>3</sub>)

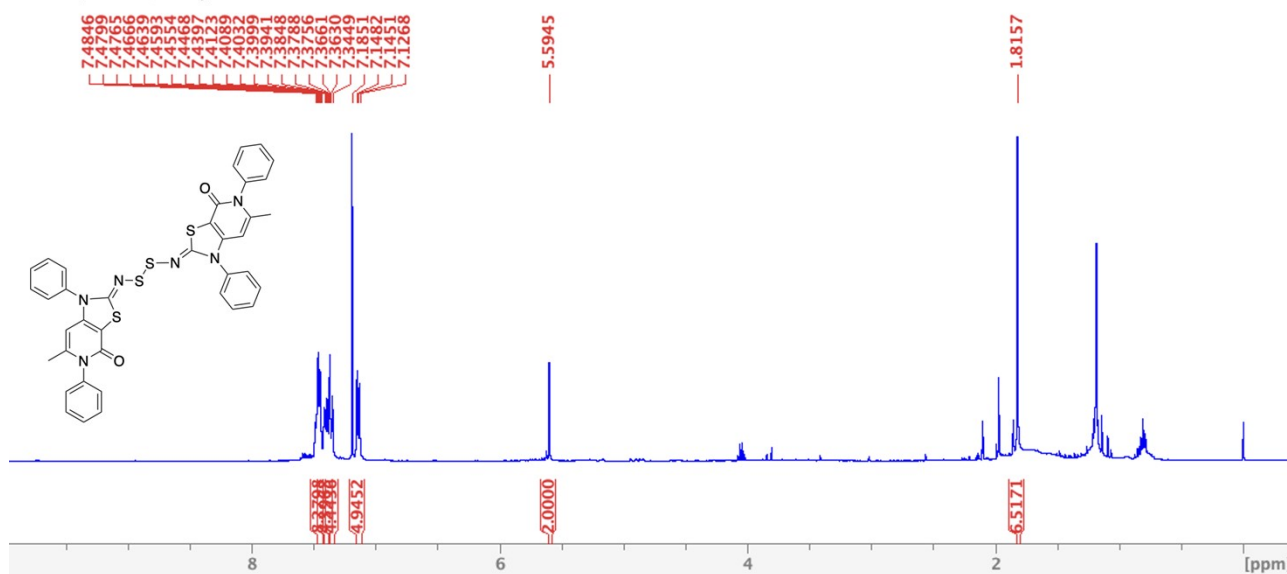

<sup>13</sup>C NMR (100.6 MHz, CDCl<sub>3</sub>)

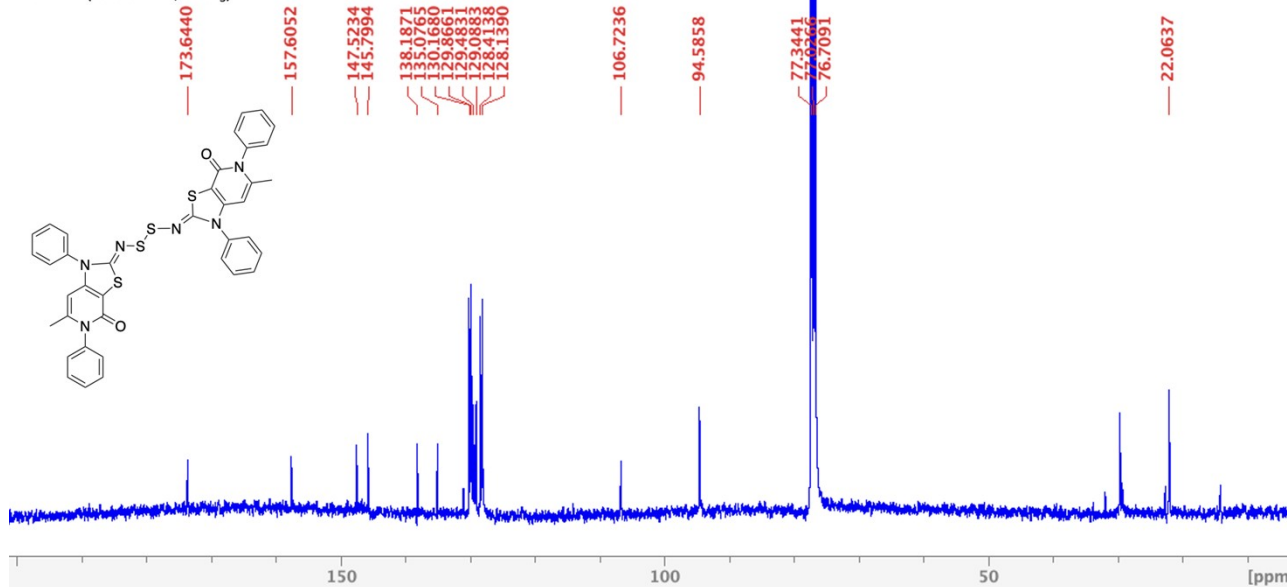

# Compound 22c

<sup>1</sup>H NMR (400 MHz, CDCl<sub>3</sub>)

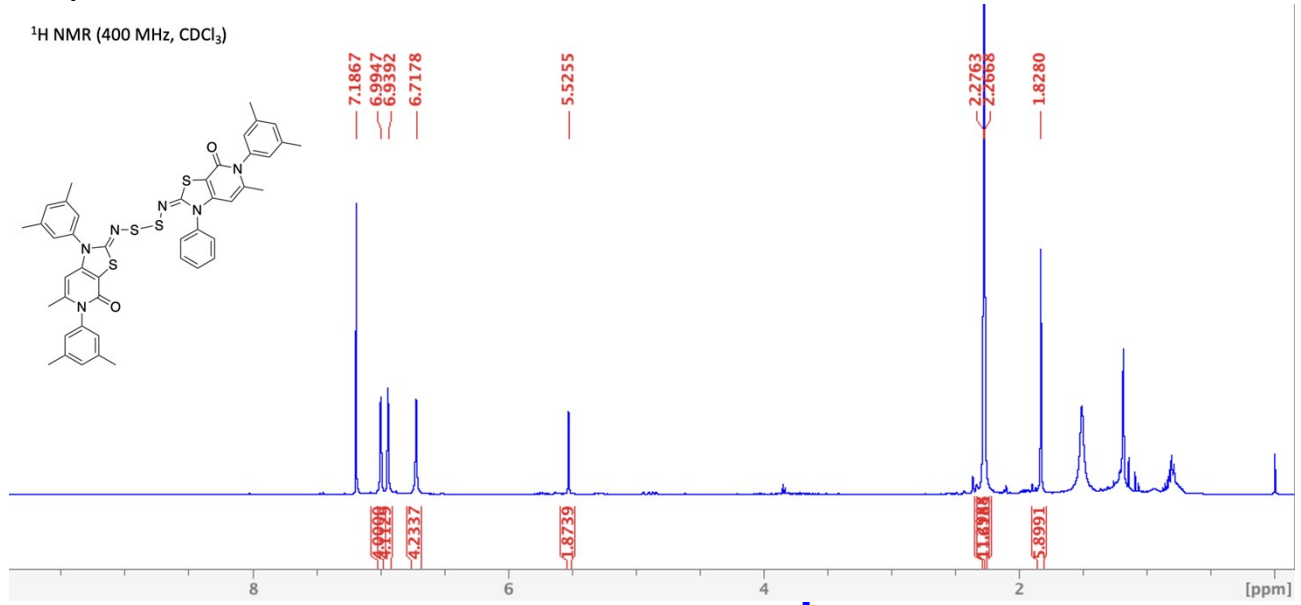

<sup>13</sup>C NMR (100.6 MHz, CDCl<sub>3</sub>)

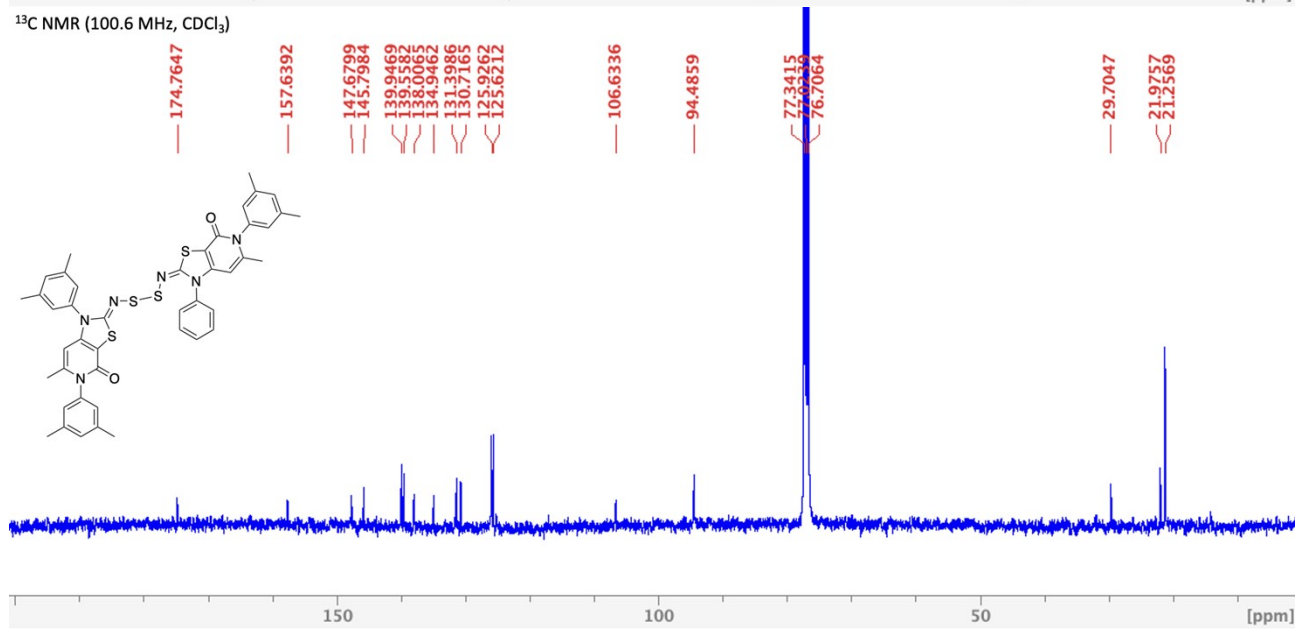

# Compound 8

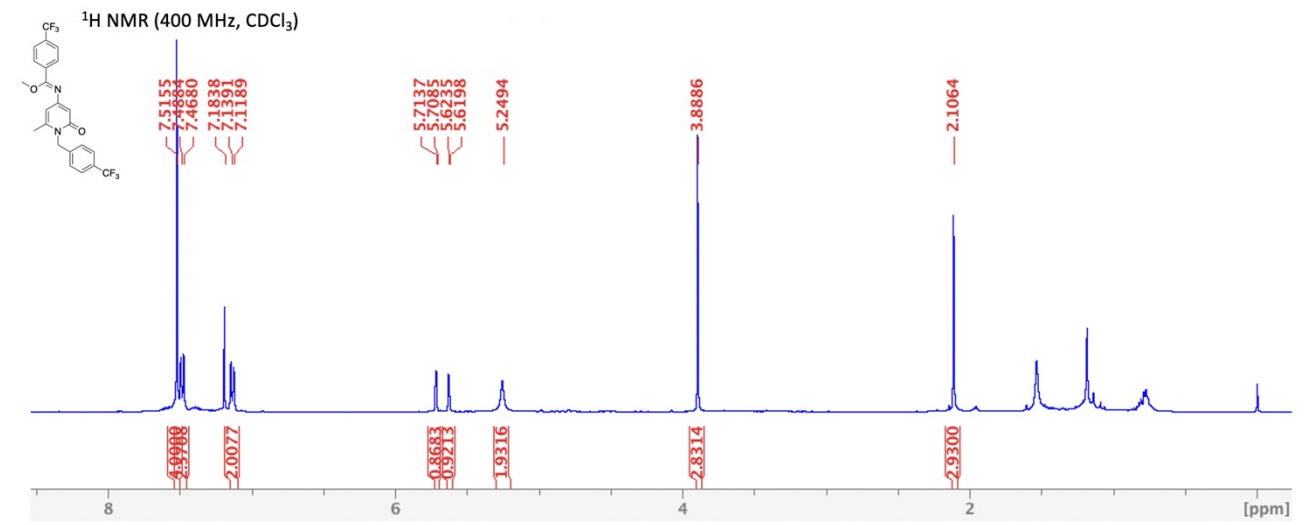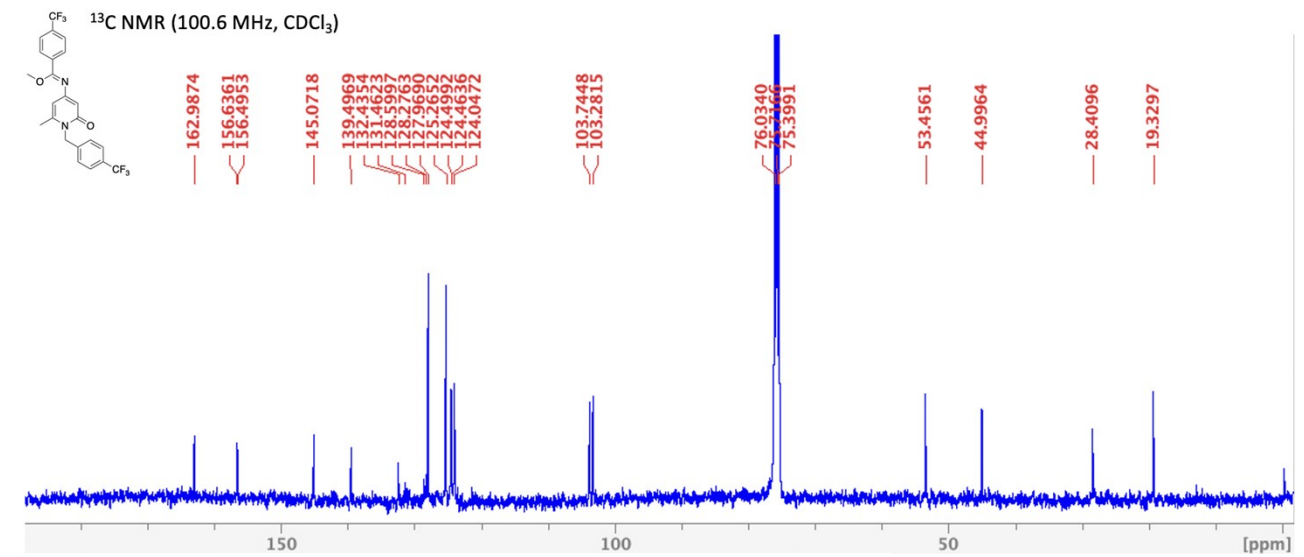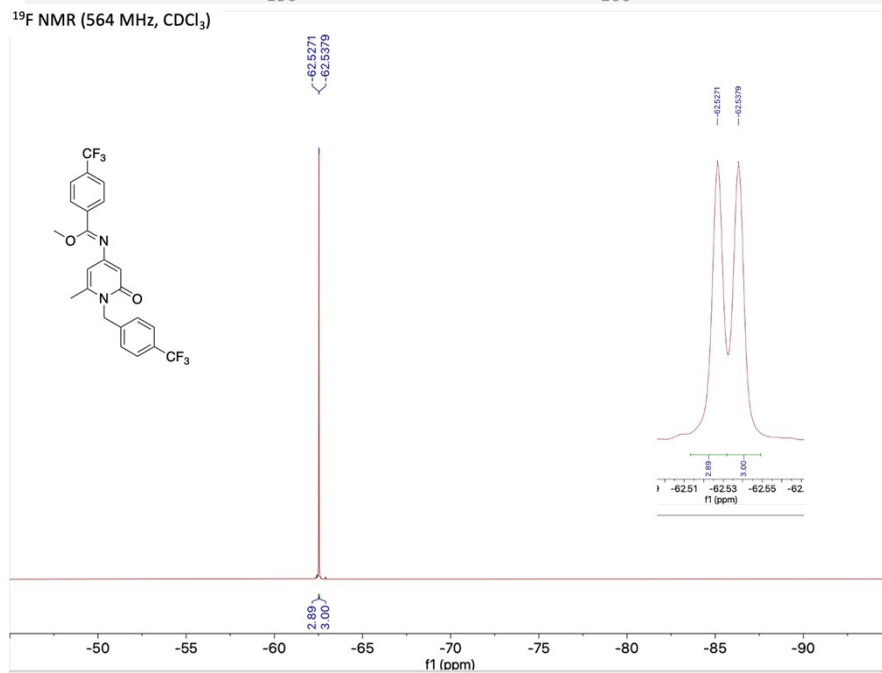

**MCR-LSF:**  
**Compound 9a**

<sup>1</sup>H NMR (400 MHz, CDCl<sub>3</sub>)

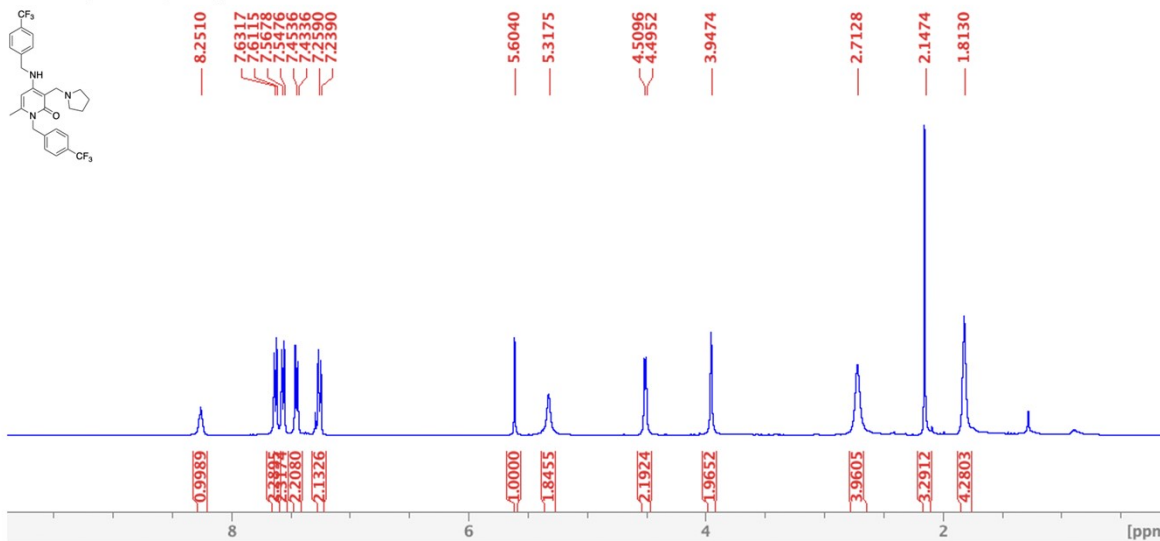

<sup>13</sup>C NMR (100.6 MHz, CDCl<sub>3</sub>)

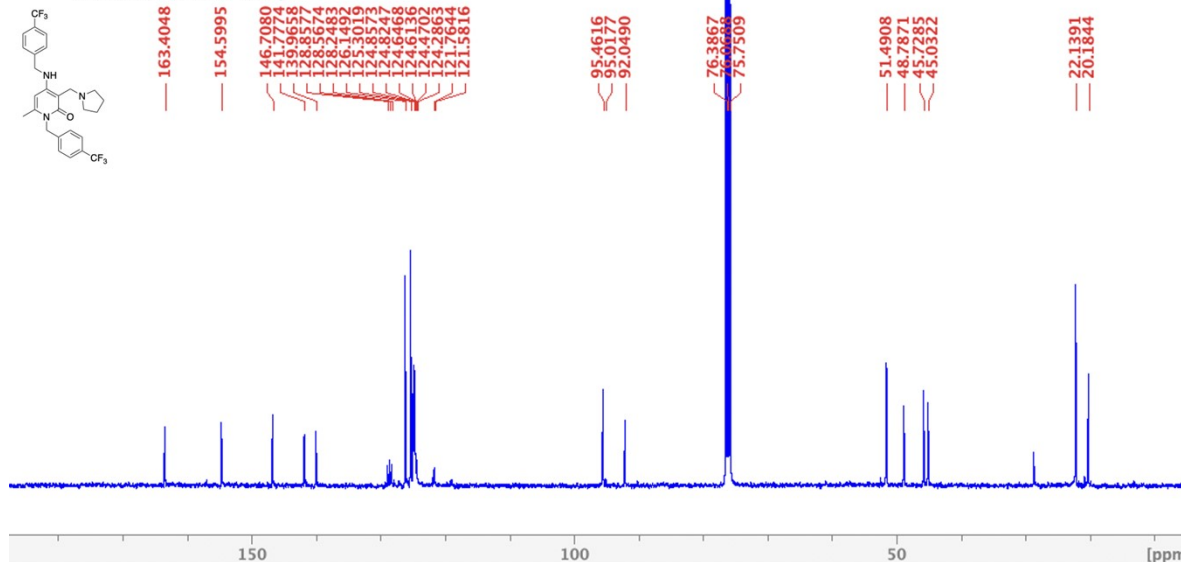

<sup>19</sup>F NMR (564 MHz, CDCl<sub>3</sub>)

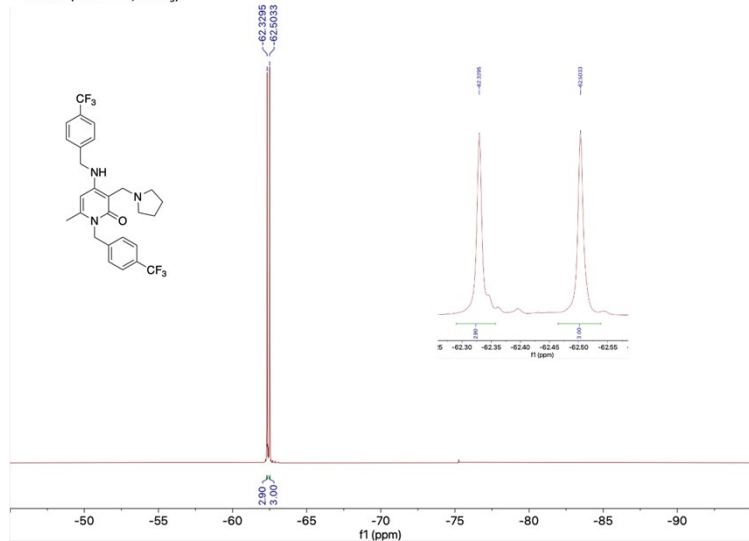

# Compound 9b

<sup>1</sup>H NMR (400 MHz, CDCl<sub>3</sub>)

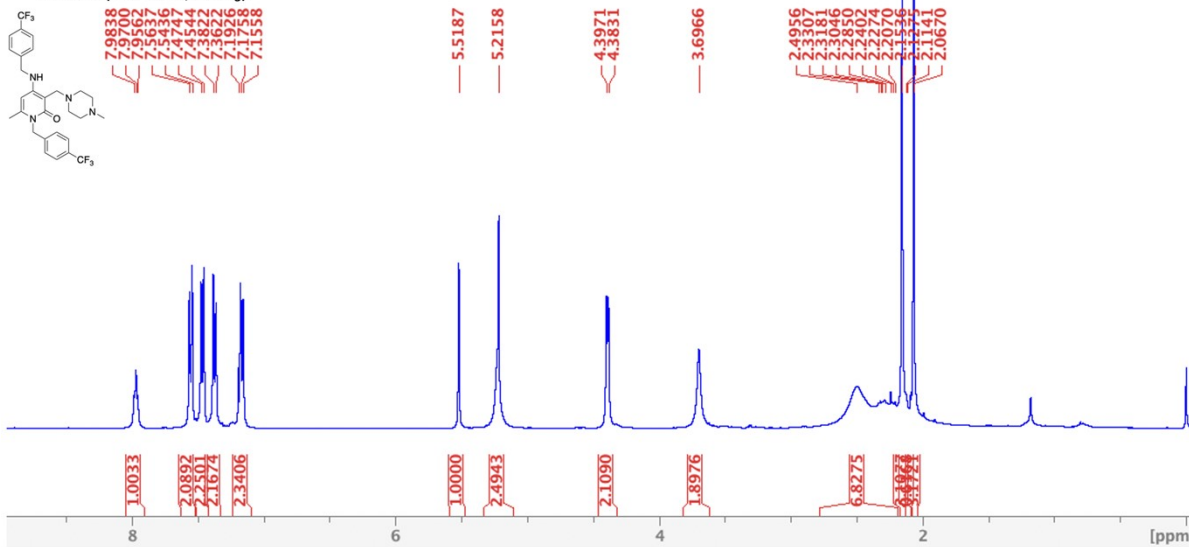

<sup>13</sup>C NMR (100.6 MHz, CDCl<sub>3</sub>)

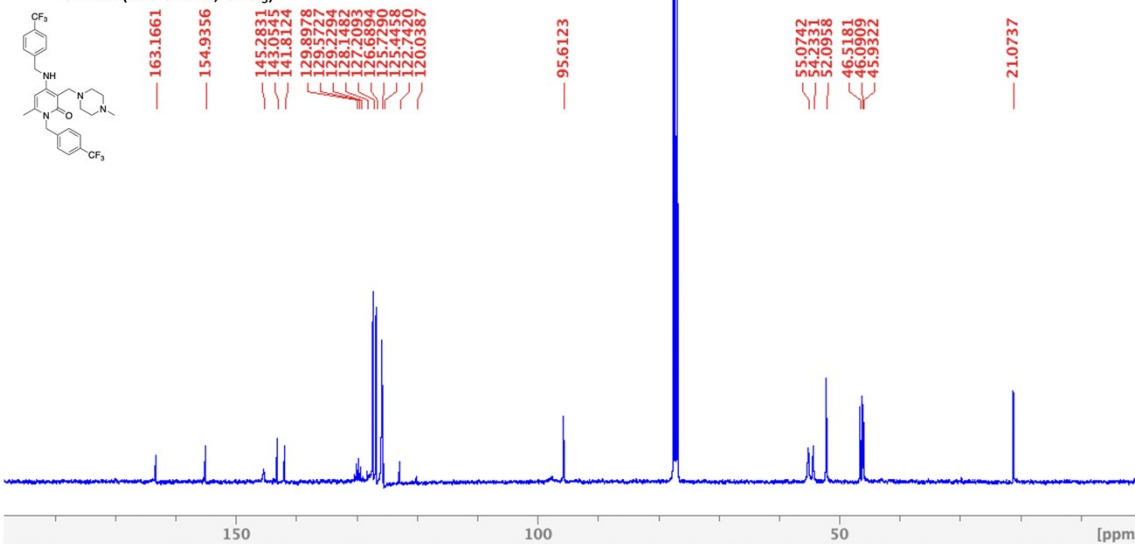

<sup>19</sup>F NMR (564 MHz, CDCl<sub>3</sub>)

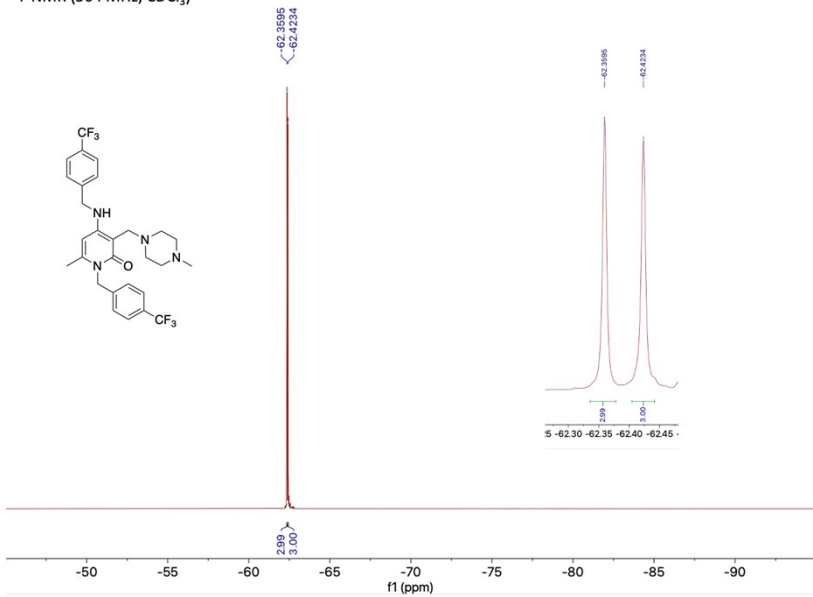

# Compound 25a

<sup>1</sup>H NMR (400 MHz, CDCl<sub>3</sub>)

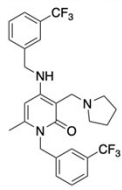

8.0898  
7.4763  
7.4609  
7.4176  
7.4078  
7.3982  
7.3574  
7.3334  
7.3140  
7.2838  
7.2689  
7.1886

5.5271

5.2196

4.4285

4.4142

3.9355

2.7468

2.0637

1.7665

0.8794

5.1190

1.9477

0.9385

1.0000

1.9454

1.9965

1.9309

3.6451

3.1283

3.9592

[ppm]

<sup>13</sup>C NMR (100.6 MHz, CDCl<sub>3</sub>)

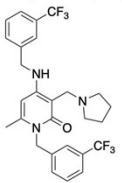

163.3531

154.9620

145.6709

140.0896

138.6173

137.1908

130.5569

130.1423

129.6489

129.3117

125.3387

124.1083

123.4545

122.8393

95.9701

77.3645

76.7292

52.9714

46.4947

46.0483

29.6922

23.4768

21.1001

[ppm]

<sup>19</sup>F NMR (564 MHz, CDCl<sub>3</sub>)

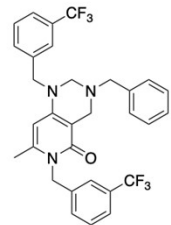

62.4273

62.5028

62.4273

62.5028

1.00

1.00

-70 -62.40 -62.42 -62.44 -62.46 -62.48 -62.50 -62.52

f1 (ppm)

f1 (ppm)

# Compound 25b

<sup>1</sup>H NMR (400 MHz, CDCl<sub>3</sub>)

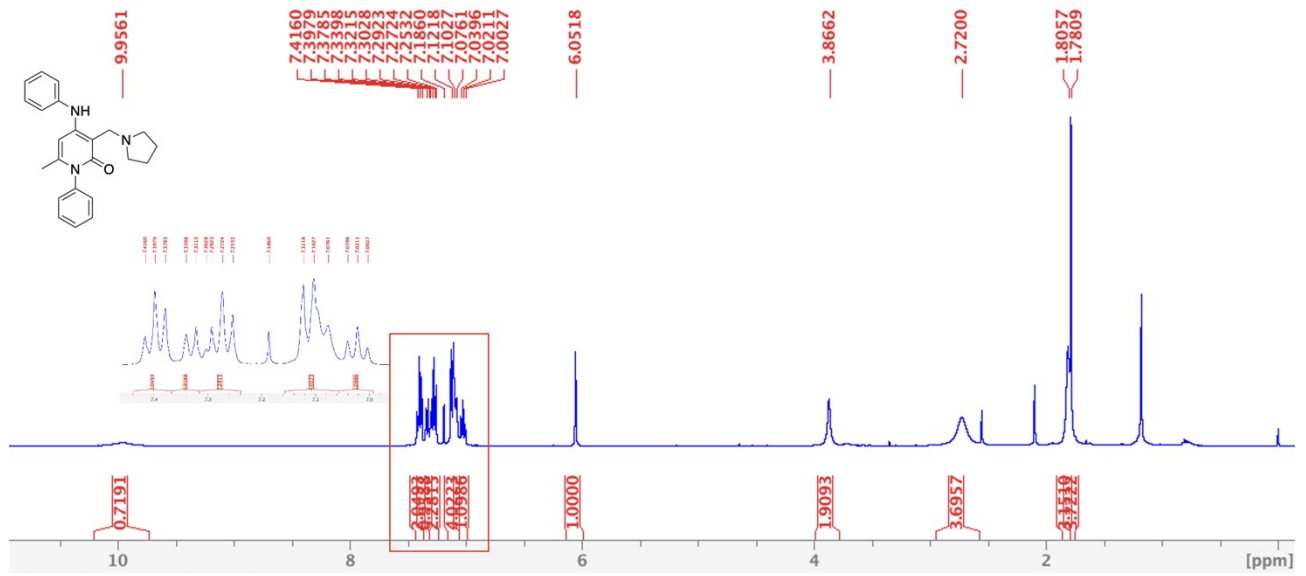

<sup>13</sup>C NMR (100.6 MHz, CDCl<sub>3</sub>)

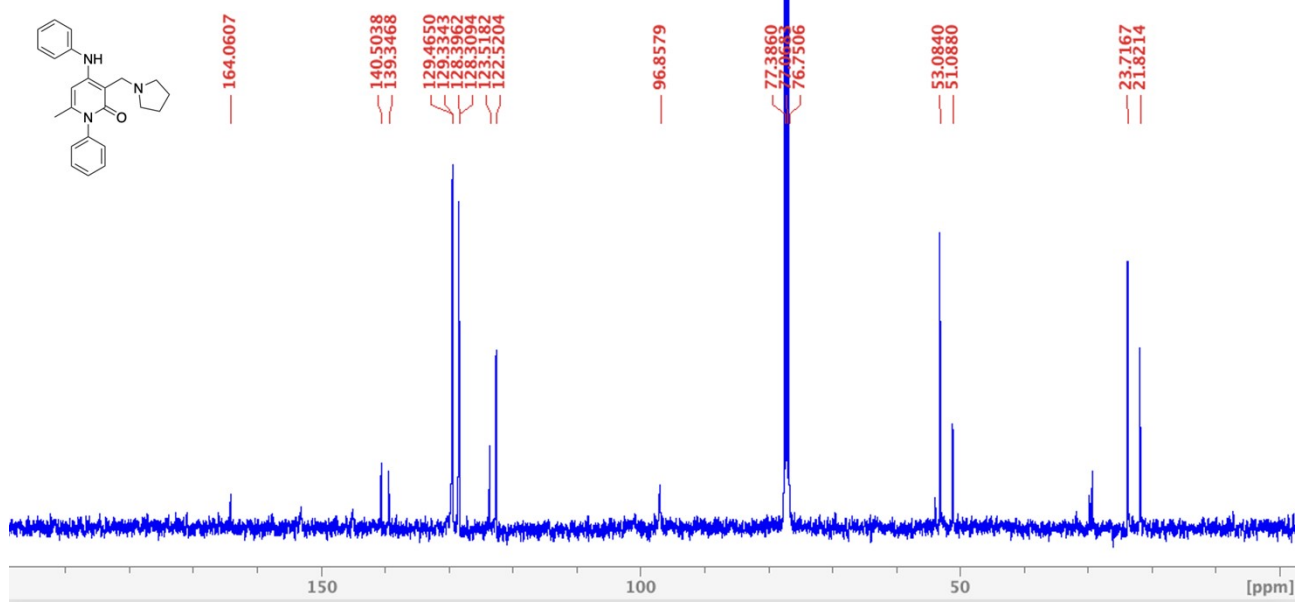



# Compound 25c

<sup>1</sup>H NMR (400 MHz, CDCl<sub>3</sub>)

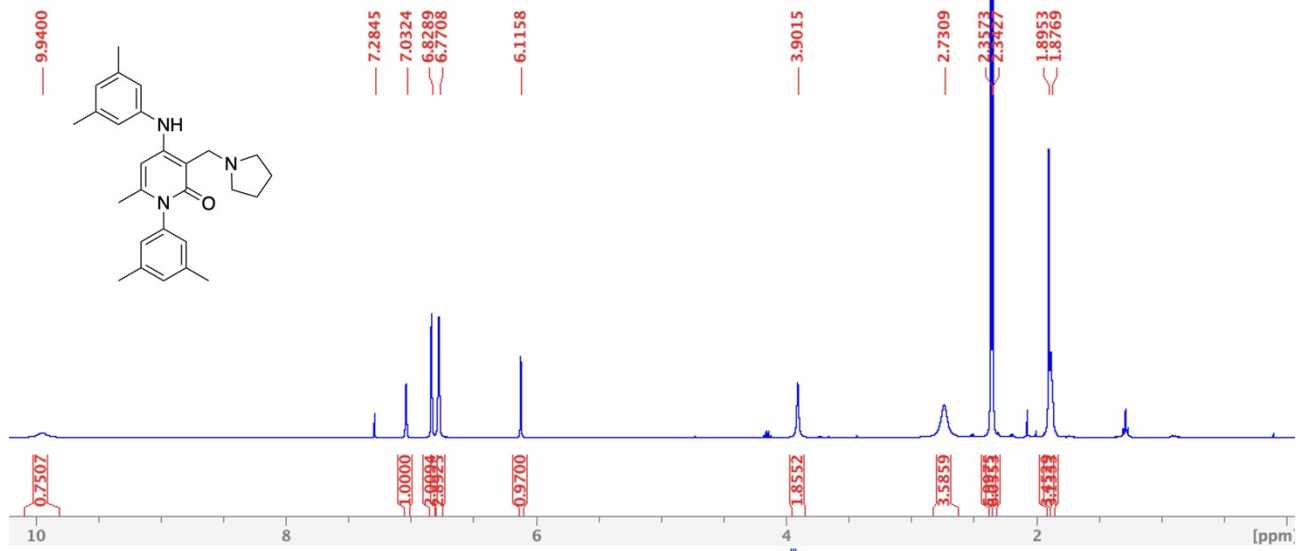

<sup>13</sup>C NMR (100.6 MHz, CDCl<sub>3</sub>)

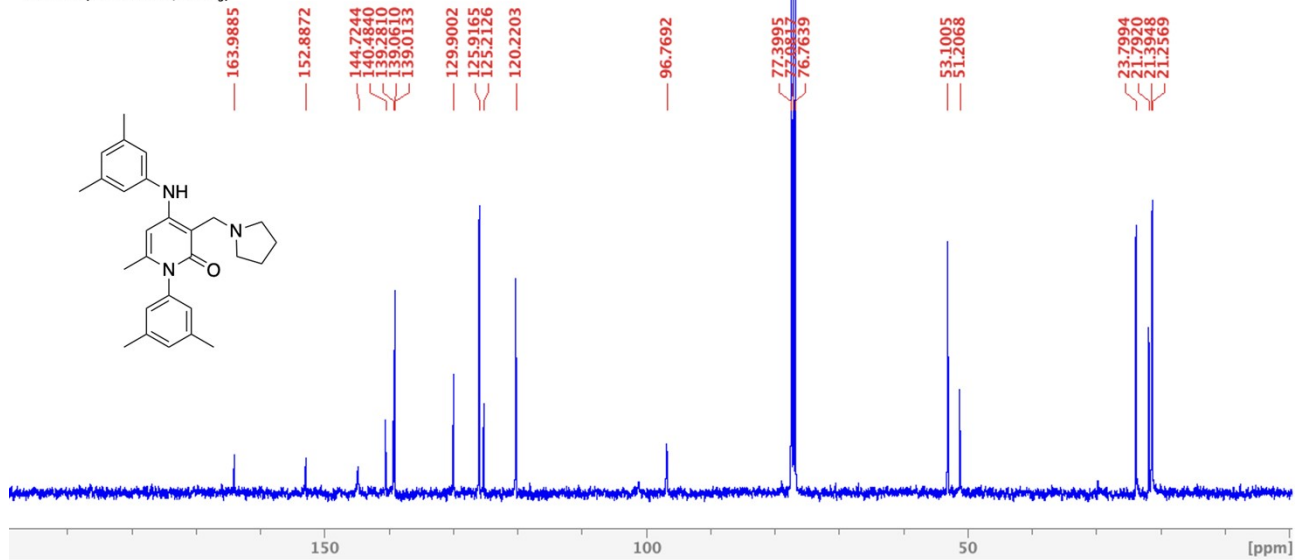

# Compound 10a

<sup>1</sup>H NMR (400 MHz, CDCl<sub>3</sub>)

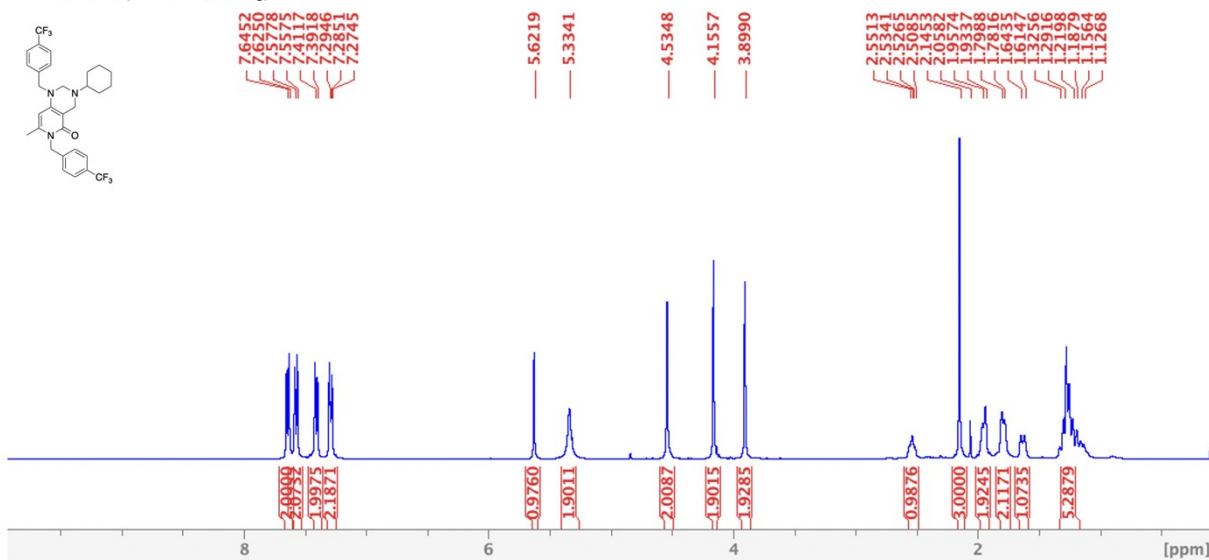

<sup>13</sup>C NMR (100.6 MHz, CDCl<sub>3</sub>)

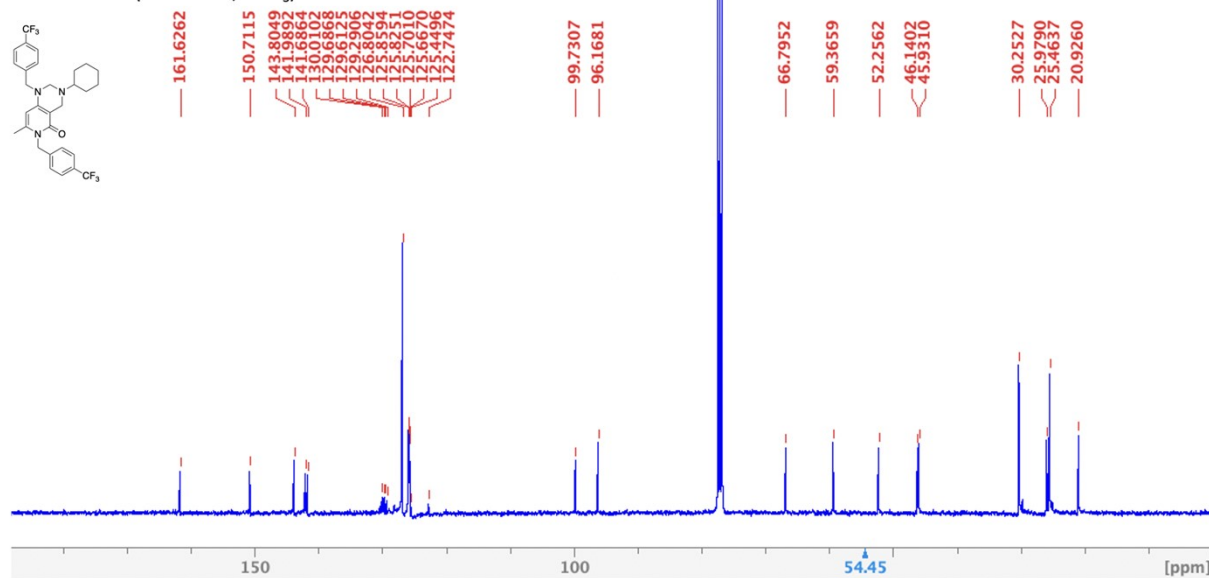

<sup>19</sup>F NMR (564 MHz, CDCl<sub>3</sub>)

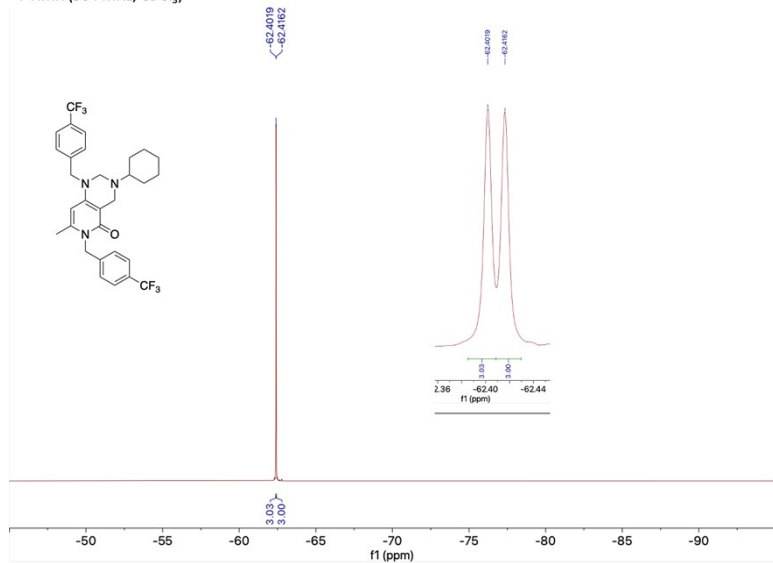

# Compound 10b

<sup>1</sup>H NMR (400 MHz, CDCl<sub>3</sub>)

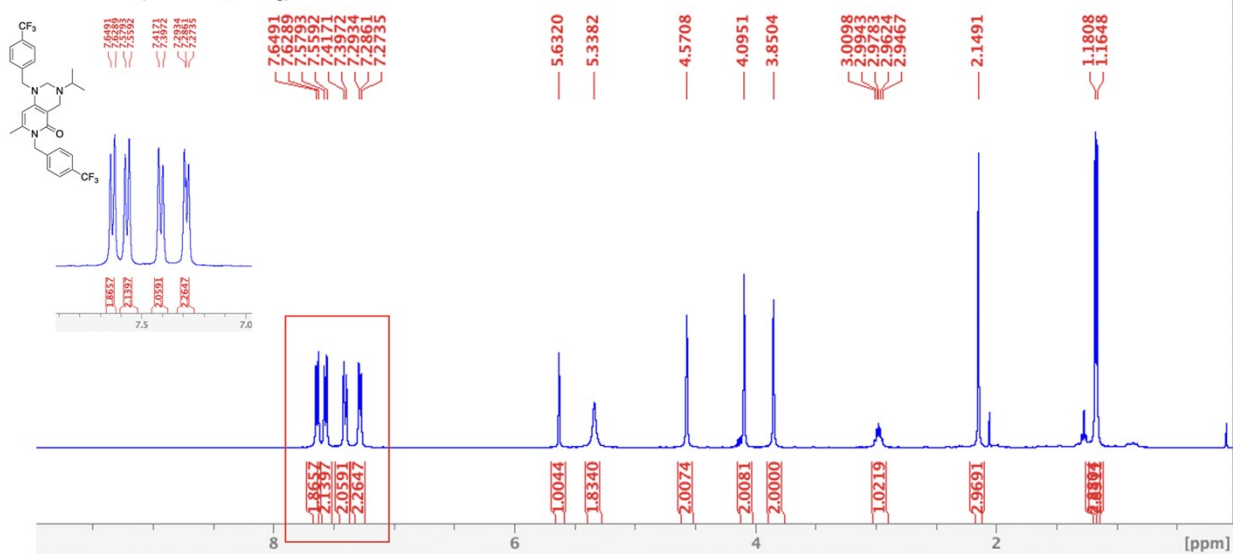

<sup>13</sup>C NMR (100.6 MHz, CDCl<sub>3</sub>)

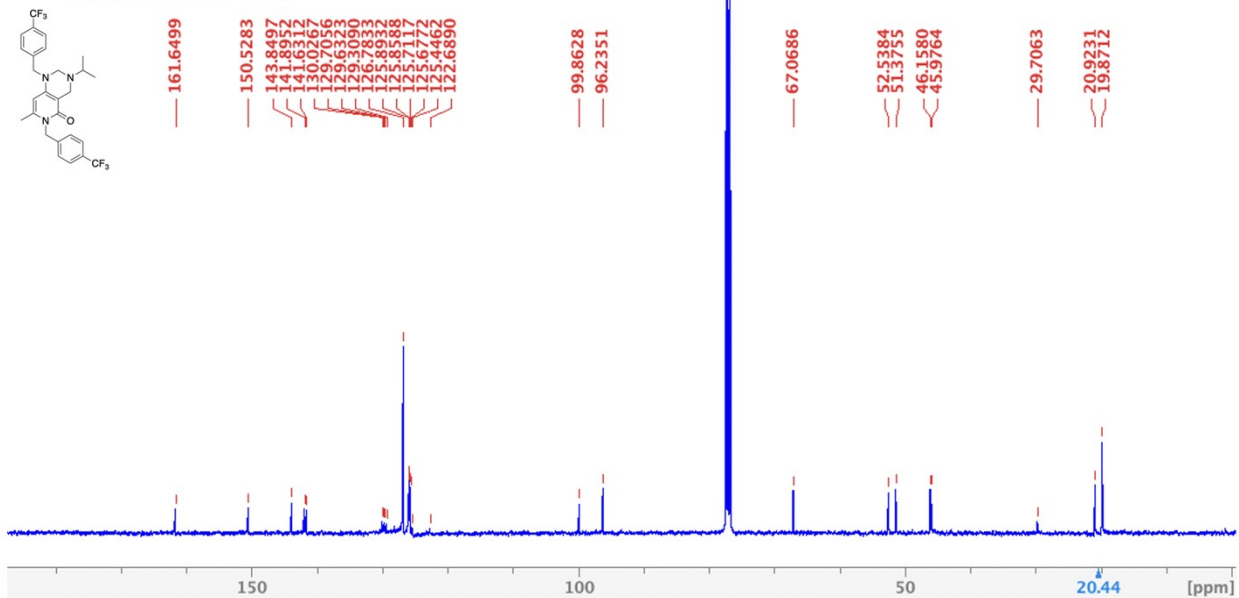

<sup>19</sup>F NMR (564 MHz, CDCl<sub>3</sub>)

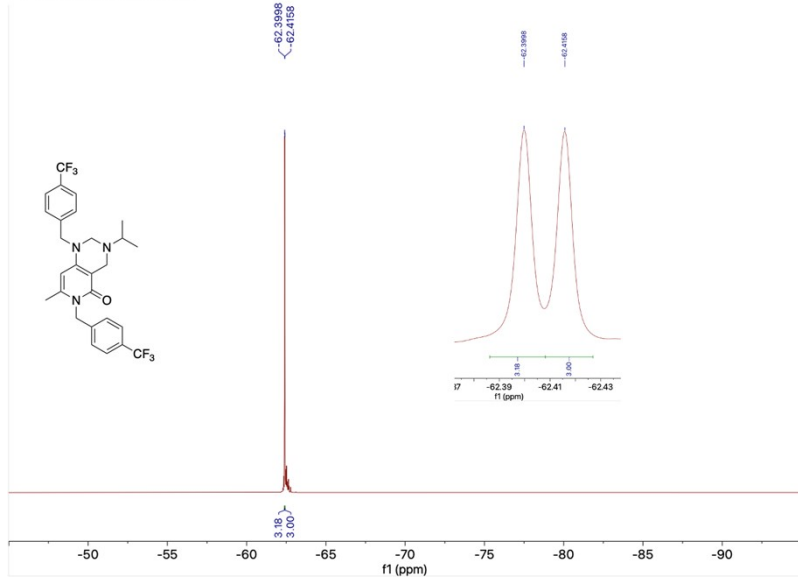

# Compound 10c

<sup>1</sup>H NMR (400 MHz, CDCl<sub>3</sub>)

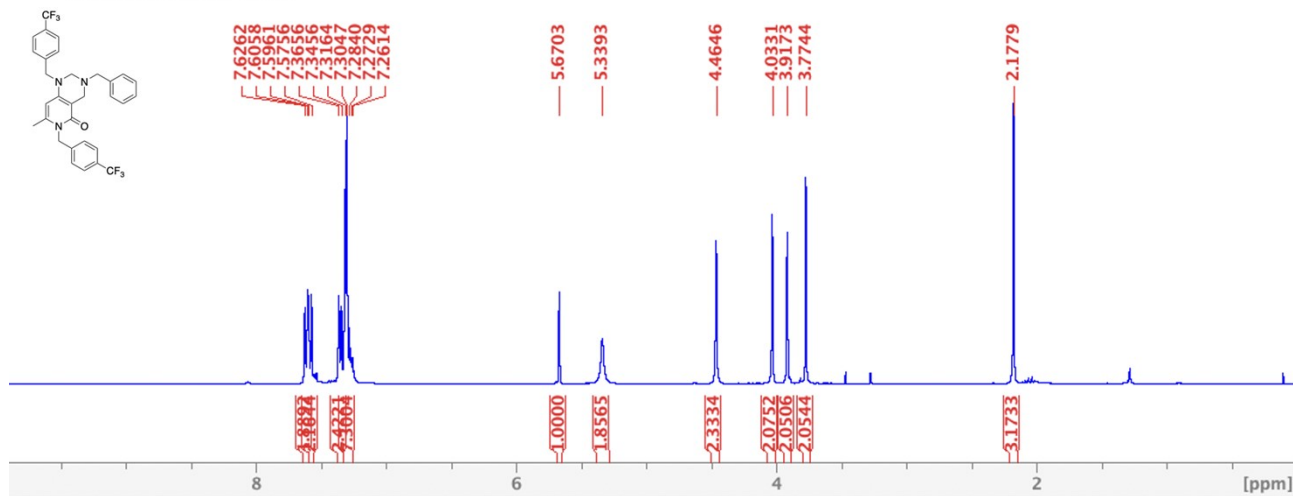

<sup>13</sup>C NMR (100.6 MHz, CDCl<sub>3</sub>)

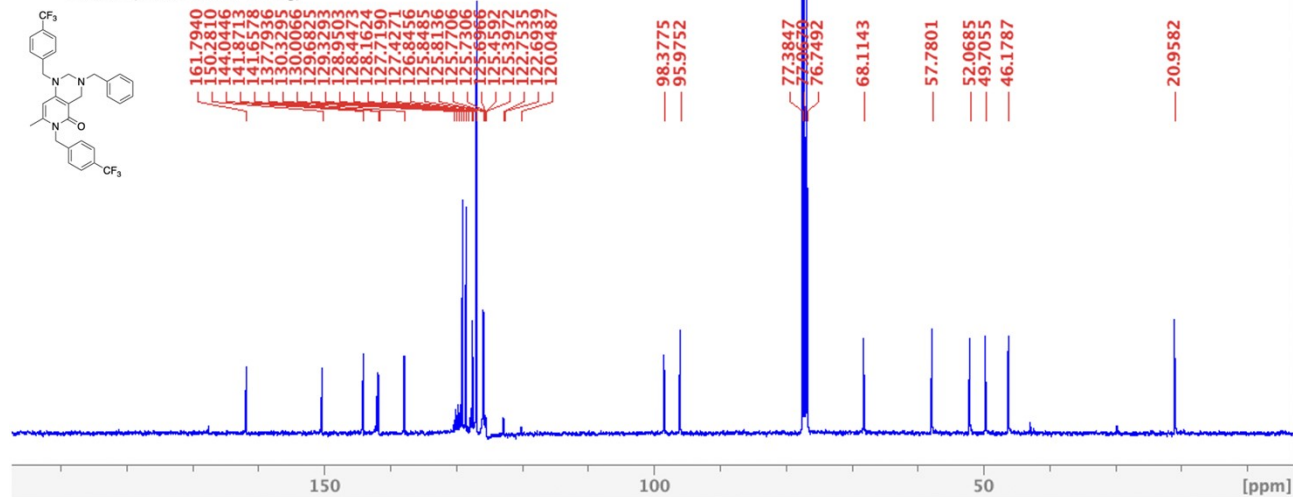

<sup>19</sup>F NMR (564 MHz, CDCl<sub>3</sub>)

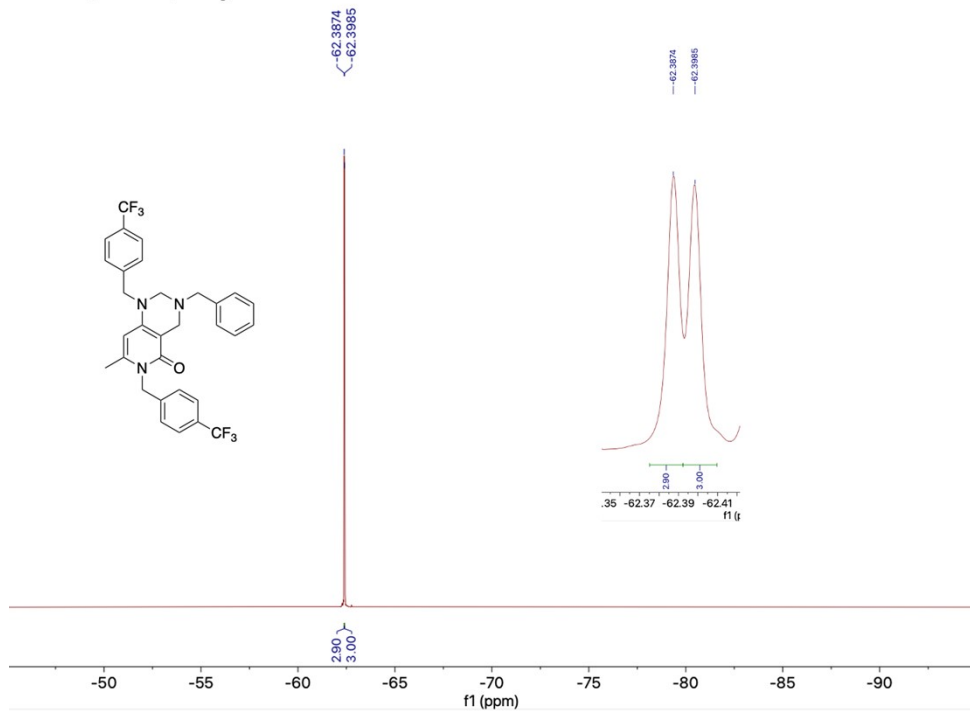

# Compound 10d

<sup>1</sup>H NMR (400 MHz, CDCl<sub>3</sub>)

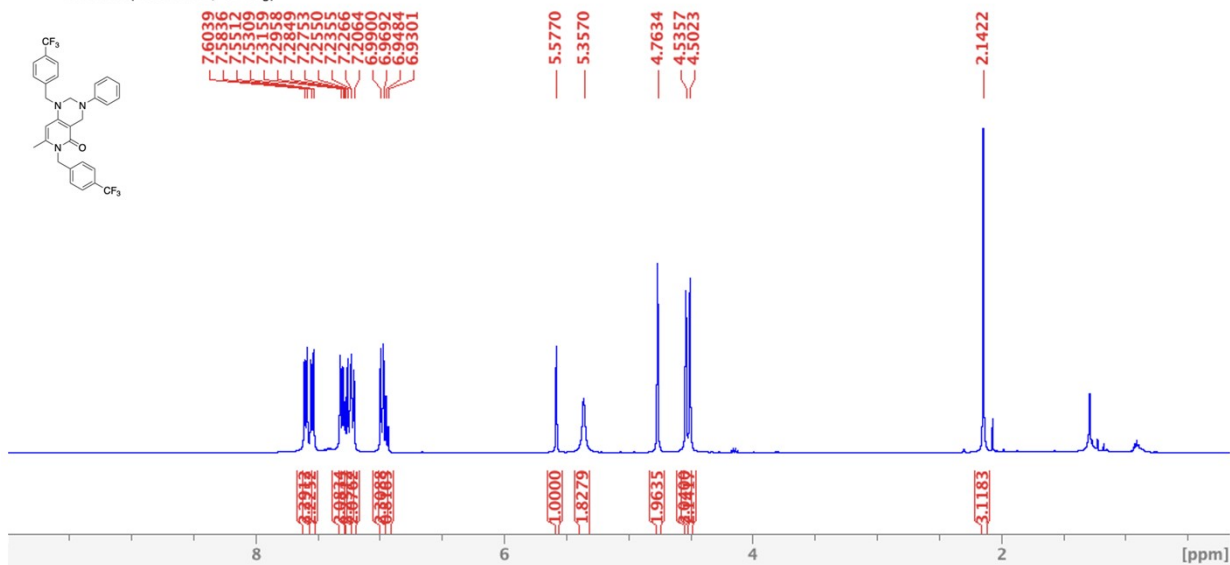

<sup>13</sup>C NMR (100.6 MHz, CDCl<sub>3</sub>)

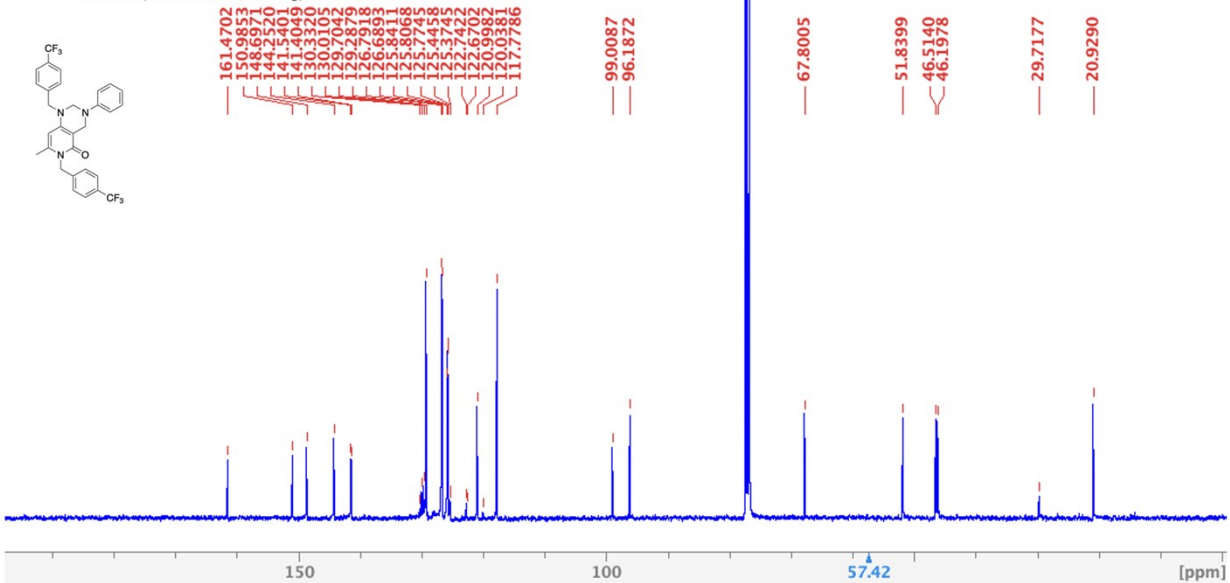

<sup>19</sup>F NMR (564 MHz, CDCl<sub>3</sub>)

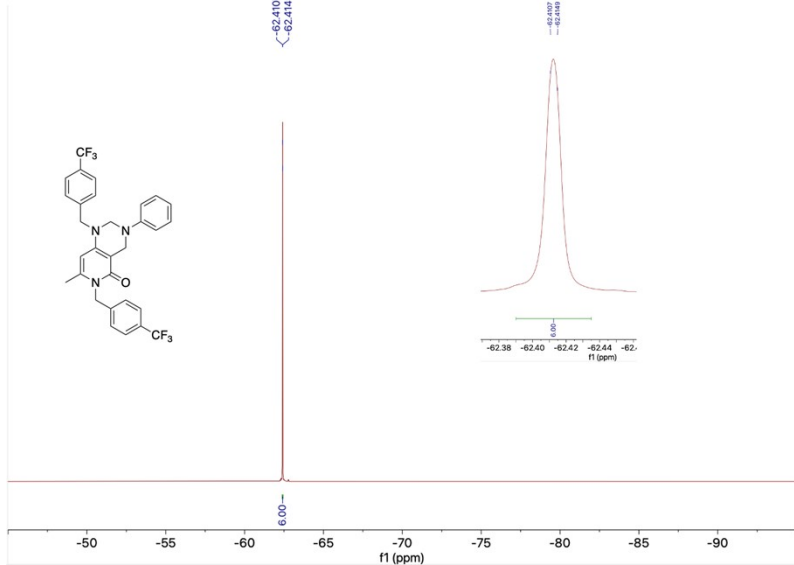

# Compound 26a

<sup>1</sup>H NMR (600 MHz, CDCl<sub>3</sub>)

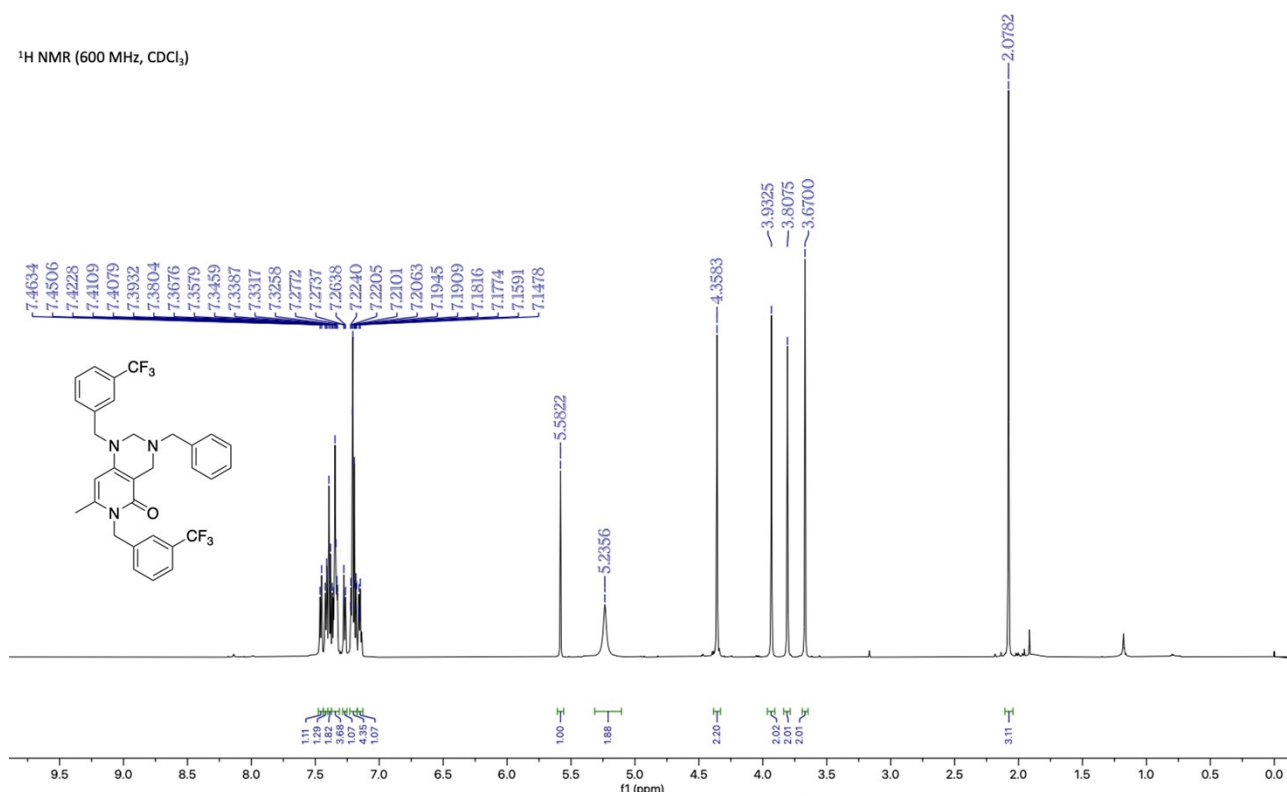

<sup>13</sup>C NMR (150 MHz, CDCl<sub>3</sub>)

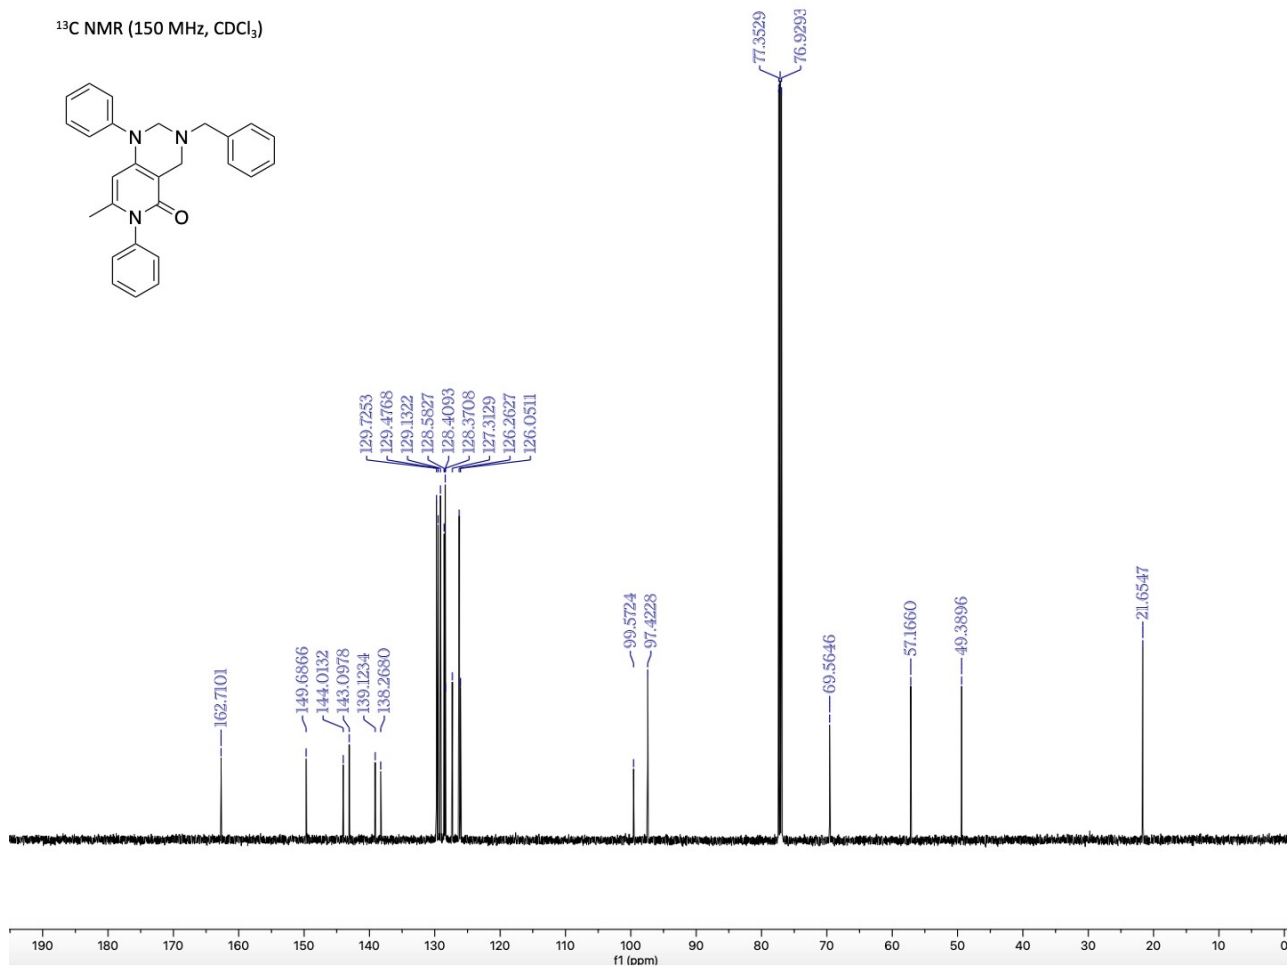

# Compound 26b

<sup>1</sup>H NMR (600 MHz, CDCl<sub>3</sub>)

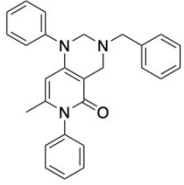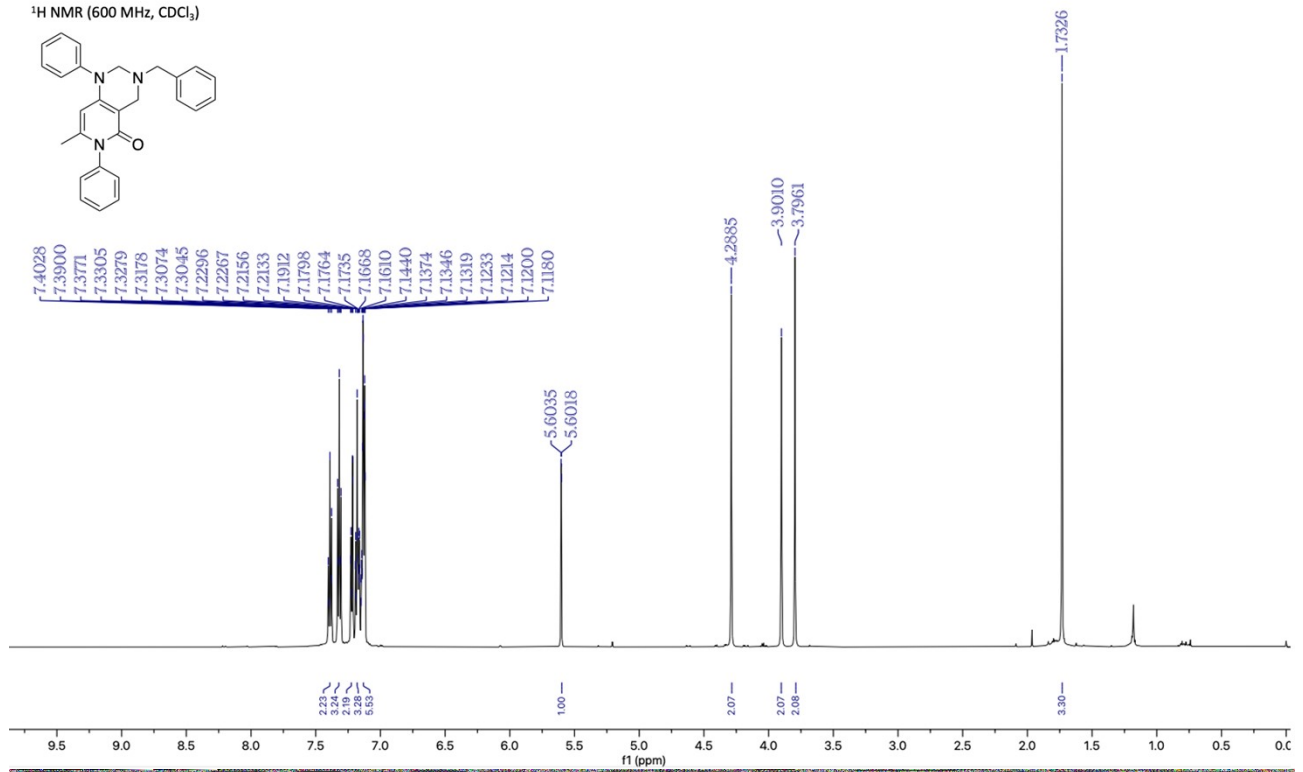

# Compound 26c

<sup>1</sup>H NMR (400 MHz, CDCl<sub>3</sub>)

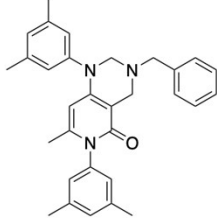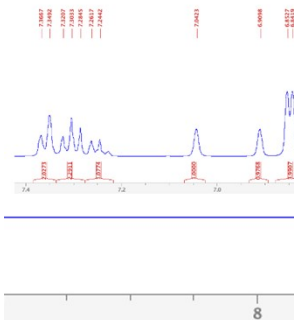

<sup>13</sup>C NMR (100.6 MHz, CDCl<sub>3</sub>)

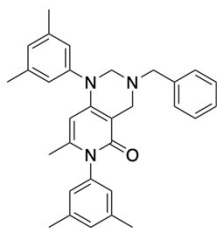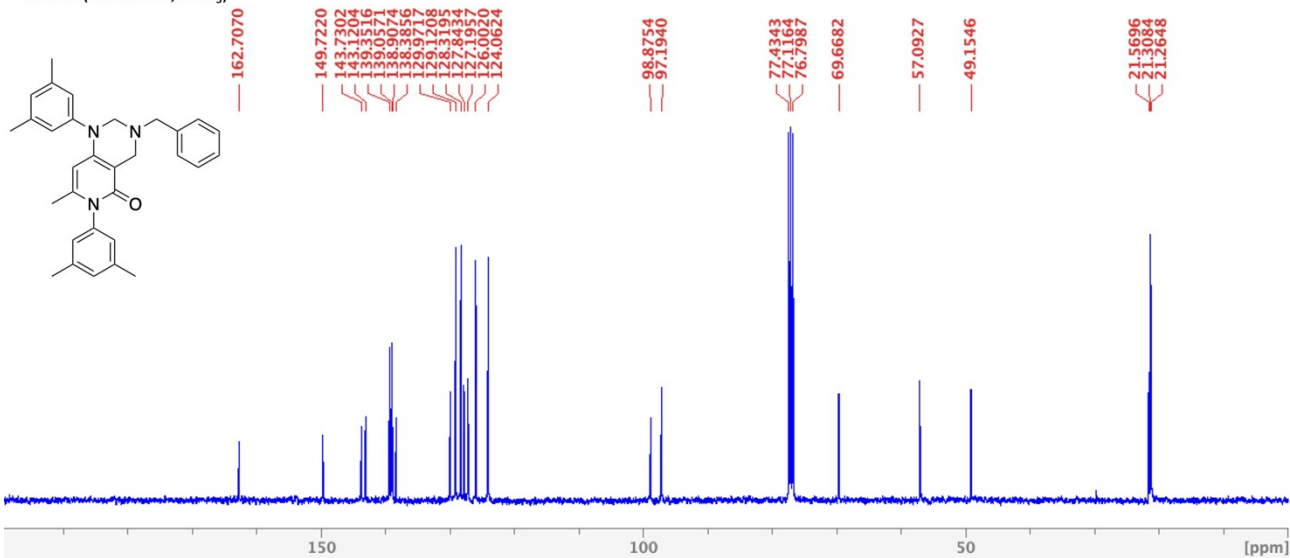



## 8. X-ray diffraction analysis

The crystal structures of compounds **7** and **17** were determined by X-ray diffraction on single crystals grown by slow evaporation of a solution of chloroform and hexane. Crystal data and experimental details for data collection and structure refinement are reported in Table 5. Intensity data and cell parameters were recorded at 200(2) K on a Bruker D8 Venture PhotonII diffractometer (CuK $\alpha$  radiation  $\lambda$  = 1.54178 Å). The raw frame data were processed using SAINT and SADABS to yield the reflection data files.<sup>A</sup> The structures were solved by Direct Methods using the SHELXT program<sup>B</sup> and refined on  $F_o^2$  by full-matrix least-squares procedures, using SHELXL-2018<sup>C</sup> in the WinGX suite v.2021.2.<sup>D</sup> All non-hydrogen atoms were refined with anisotropic atomic displacements. The hydrogen atoms were included in the refinement at idealized geometry and refined “riding” on the corresponding parent atoms. In view of the presence of disordered electron density which could not be properly modelled, the structures were subjected to the program SQUEEZE.<sup>E</sup> In both cases, the solvent contribution to the diffraction pattern (water for **7** and chloroform for **17**) was removed and modified  $F_o^2$  written to a new HKL file. The number of electrons corresponding to the solvent molecules were included in the formula, formula weight, calculated density,  $m$  and  $F(000)$ . The weighting schemes used in the last cycle of refinement were  $w = 1/[\sigma^2 F_o^2 + (0.0538P)^2 + 2.2826P]$  (**7**) and  $w = 1/[\sigma^2 F_o^2 + (0.3806P)^2]$  (**17**), where  $P = (F_o^2 + 2F_c^2)/3$ . The crystallographic data have been deposited with the Cambridge Crystallographic Data Centre as supplementary publication no. 2351138-2351139 and can be obtained free of charge on application to the CCDC, 12 Union Road, Cambridge, CB2 1EZ, UK (e-mail deposit@ccdc.cam.ac.uk or <http://www.ccdc.cam.ac.uk>).

- A. SADABS 2016/2, Krause, L.; Herbst-Irmer, R.; Sheldrick, G. M.; Stalke, D. Comparison of silver and molybdenum microfocus X-ray sources for single-crystal structure determination. *J. Appl. Cryst.* **2015**, *48*, 3-10.
- B. Sheldrick, G. M. SHELXT – Integrated space-group and crystal-structure determination. *Acta Cryst.* **2015**, *A71*, 3-8.
- C. Sheldrick, G. M. Crystal structure refinement with SHELXL. *Acta Cryst.* **2008**, *A64*, 112-122.
- D. Farrugia, L. J. WinGX suite for small-molecule single-crystal crystallography. *J. Appl. Crystallogr.* **1999**, *32*, 837-838.
- E. Spek, A. L. PLATON SQUEEZE: a tool for the calculation of the disordered solvent contribution to the calculated structure factors. *Acta Cryst.* **2015**, *C71*, 9-18.

**Table 6.** Crystal data and structure refinement information for compounds **7** and **17**.

| Compound                                                                                                                           | <b>7</b>                                                                               | <b>17</b>                                                                                                            |
|------------------------------------------------------------------------------------------------------------------------------------|----------------------------------------------------------------------------------------|----------------------------------------------------------------------------------------------------------------------|
| empirical formula                                                                                                                  | C <sub>23</sub> H <sub>17</sub> F <sub>6</sub> N <sub>3</sub> OS 0.5(H <sub>2</sub> O) | C <sub>46</sub> H <sub>32</sub> F <sub>12</sub> N <sub>6</sub> O <sub>2</sub> S <sub>4</sub> 2.5(CHCl <sub>3</sub> ) |
| <i>M</i>                                                                                                                           | 506.46                                                                                 | 1355.43                                                                                                              |
| cryst syst                                                                                                                         | Orthorhombic                                                                           | Triclinic                                                                                                            |
| space group                                                                                                                        | <i>Fdd2</i>                                                                            | <i>P</i> -1                                                                                                          |
| <i>a</i> /Å                                                                                                                        | 13.8237(7)                                                                             | 10.9640(7)                                                                                                           |
| <i>b</i> /Å                                                                                                                        | 50.8400(10)                                                                            | 14.7925(9)                                                                                                           |
| <i>c</i> /Å                                                                                                                        | 12.4078(5)                                                                             | 19.0470(9)                                                                                                           |
| <i>a</i> /°                                                                                                                        | 90                                                                                     | 79.382(2)                                                                                                            |
| <i>β</i> /°                                                                                                                        | 90                                                                                     | 87.727(2)                                                                                                            |
| <i>γ</i> /°                                                                                                                        | 90                                                                                     | 73.299(2)                                                                                                            |
| <i>V</i> /Å <sup>3</sup>                                                                                                           | 8720.2(6)                                                                              | 2907.9(3)                                                                                                            |
| <i>Z</i>                                                                                                                           | 16                                                                                     | 2                                                                                                                    |
| <i>ρ</i> /g cm <sup>-3</sup>                                                                                                       | 1.543                                                                                  | 1.548                                                                                                                |
| <i>D<sub>x</sub></i> /mm <sup>-1</sup>                                                                                             | 2.021                                                                                  | 5.412                                                                                                                |
| <i>F</i> (000)                                                                                                                     | 4144                                                                                   | 1366                                                                                                                 |
| total reflections                                                                                                                  | 35778                                                                                  | 106552                                                                                                               |
| unique reflections ( <i>R</i> <sub>int</sub> )                                                                                     | 4157 (0.0834)                                                                          | 11517 (0.0685)                                                                                                       |
| observed reflections [ <i>F</i> <sub>o</sub> >4σ( <i>F</i> <sub>o</sub> )]                                                         | 3509                                                                                   | 10602                                                                                                                |
| GOF on <i>F</i> <sup>2σ</sup>                                                                                                      | 1.014                                                                                  | 1.017                                                                                                                |
| <i>R</i> indices [ <i>F</i> <sub>o</sub> >4σ( <i>F</i> <sub>o</sub> )] <sup>b</sup> <i>R</i> <sub>1</sub> , <i>wR</i> <sub>2</sub> | 0.0371, 0.927                                                                          | 0.0989, 11517                                                                                                        |
| largest diff. peak and hole (eÅ <sup>-3</sup> )                                                                                    | 0.156, -0.139                                                                          | 1.213, -1.000                                                                                                        |

<sup>a</sup>Goodness-of-fit  $S = [\sum w(F_o^2 - F_c^2)^2 / (n-p)]^{1/2}$ , where *n* is the number of reflections and *p* the number of parameters. <sup>b</sup> $R_1 = \sum ||F_o| - |F_c|| / \sum |F_o|$ ,  $wR_2 = [\sum [w(F_o^2 - F_c^2)^2] / \sum [w(F_o^2)^2]]^{1/2}$ .

Compound **7** crystallizes in the space group *Fdd2* with one independent molecule in the unit cell (Figure Sx). It consists of a planar bicyclic fragment comprising the atoms C1-C8/C16/N1-N3/S1/O1, and two trifluorotoluene moieties bonded to C8 and C16, that protrude in the same direction from the mean plane of the core, forming an angle of 70.05(3)° and 87.43(2)°, respectively. The molecules form a supramolecular ribbon along the direction of the crystallographic axis *c* through N-H...O hydrogen bonds [N3-H3N...O1(-*x*+3/2, -*y*+1, *z*+1/2). N3...O1=2.9876(2) Å; N3-H3N...O1=166.9(3)°].

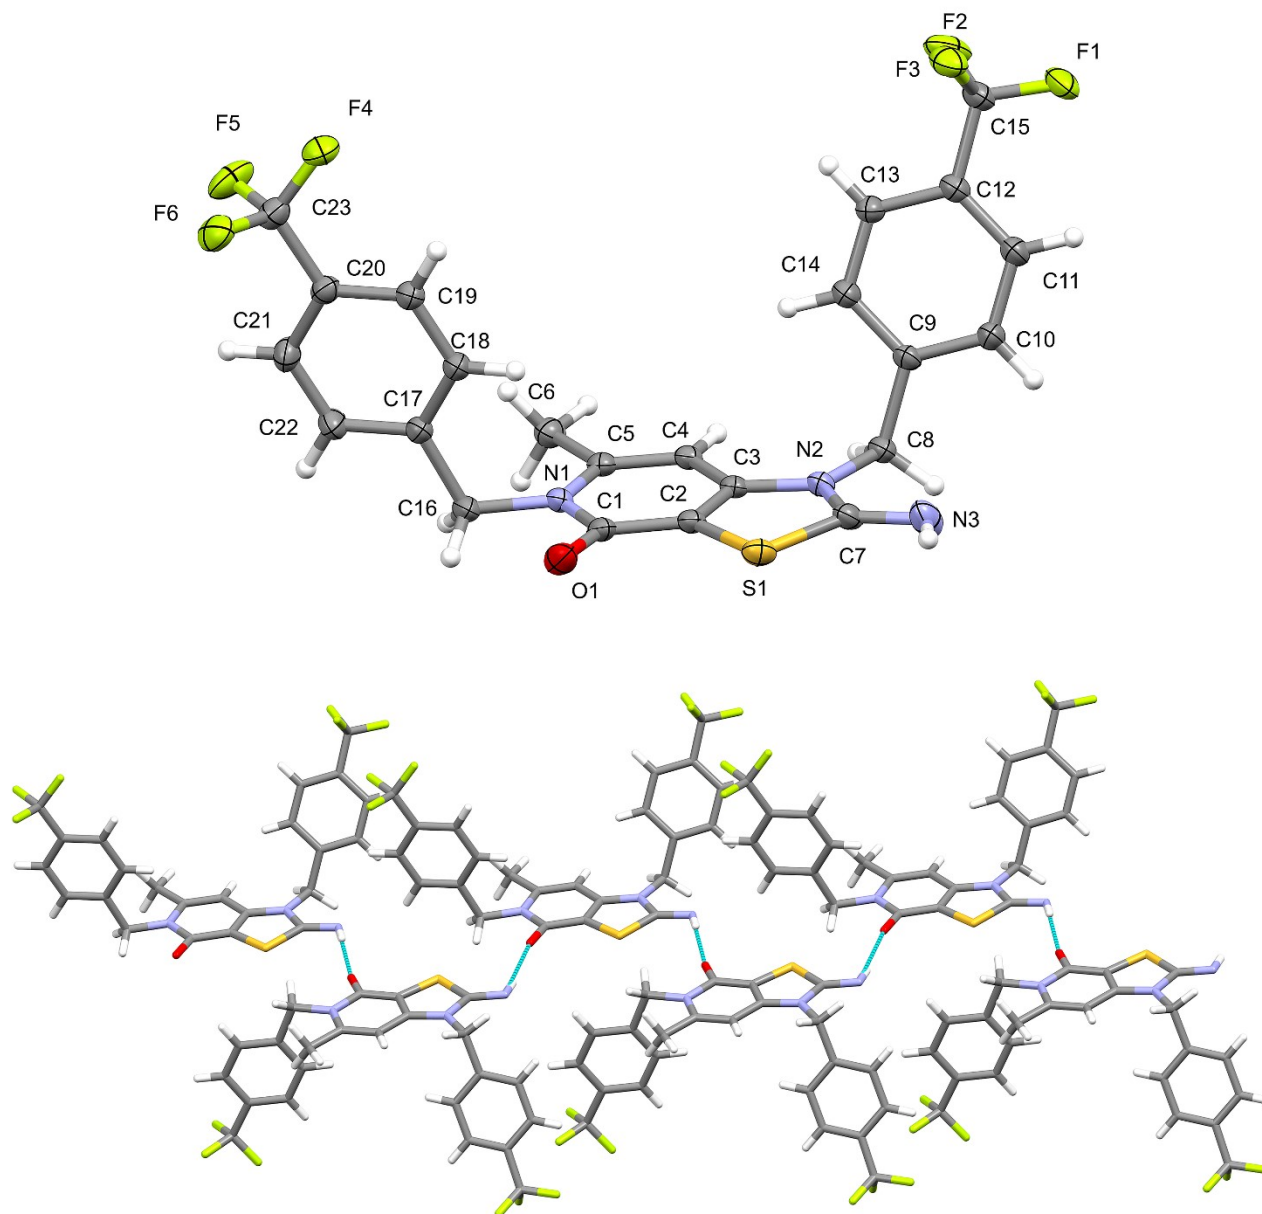

**Figure S4.** Top: ortep view of **7** with labelling scheme and ellipsoids at the 20% probability level. Bottom: supramolecular ribbon along the *c*-axis direction of the unit cell. H bonds are represented as cyan dotted lines.

Compound **17** crystallizes in the space group *P-1* with one independent molecule in the unit cell (Figure Sy and Figure 2 in the main text). It can be described as a dimeric form of **7**, in which the -C=NH fragment (-C7=N3-H3N) is replaced by a -C=N-S- moiety that generates a dimer through a -C=N-S-S=N-C- bridge. Also in this case, the bicyclic moieties are planar and the trifluorotoluene fragments protrude from the main planes passing through the planar core forming angles of

83.04(3)°, 80.77(3)°, 82.63(2)° and 80.99(4)°. Since the -C=NH fragment is not present in the molecule, no classic N-H...O hydrogen bonds are formed, and the crystal packing is mainly consolidated by dispersion interactions.

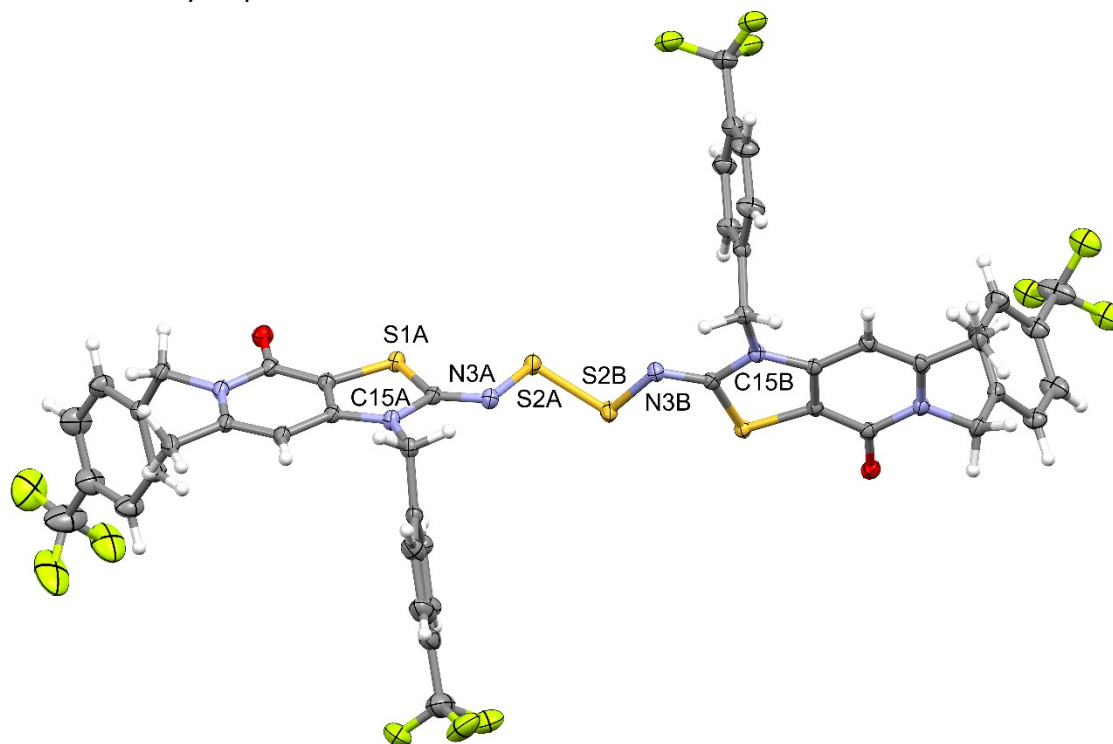

**Figure S5.** Top: ortep view of **17** with partial labelling scheme and ellipsoids at the 20% probability level. Solvent molecules have been omitted for clarity. The fluorine atoms in the trifluorotoluene rings are disordered over two geometrical positions, but only the major component is shown in the figure.
